# Supplementary material
Source: publisher figshare collection journal article supplement (https://acs.figshare.com/ndownloader/files/3991318)
Supplement: Supplementary file 1 [file 3991318]

# Highly-Substituted Enantioenriched Cyclopentane Derivatives by Palladium-Catalyzed [3+2] Trimethylenemethane Cycloadditions with Disubstituted Nitroalkenes

Barry M. Trost,\* Dustin A. Bringley and B. Michael O’Keefe  
*Department of Chemistry, Stanford University, Stanford, CA 94305-5080*

## Supporting Information

### A. General Methods

All TMM reactions were carried out under an argon atmosphere. Solvents were dried by passing through an Alumina column. All compounds were purchased from commercial sources and used directly unless listed. *m*-chloroperoxybenzoic acid was purified by the known method.<sup>i</sup> Diaza(1,3)bicyclo[5.4.0]undene (DBU) and 3-buten-2-one were purified by distillation prior to use. Solutions of potassium *tert*-butoxide were prepared by combining equimolar amounts of distilled *tert*-butanol and potassium hydride (from a 30-35% mineral oil dispersion thrice rinsed with hexanes and dried under vacuum) in THF; after stirring 30 minutes the suspension was allowed to settle and the supernatant was used directly. The following compounds were prepared according to known literature procedures: Pd(dba)<sub>2</sub>,<sup>ii</sup> 3-acetoxy-2-trimethylsilylmethyl-1-propene **1a**,<sup>iii</sup> 1-cyano-2-((trimethylsilyl)methyl)-allyl acetate **1b**,<sup>iv</sup> **L1**,<sup>v</sup> and **L2-L3**.<sup>vi</sup>

Flash chromatography was performed with 0.040-0.063  $\mu$ m Silica Gel. <sup>1</sup>H and <sup>13</sup>C NMR spectroscopy was performed on a Mercury NMR at 400 (<sup>1</sup>H) or 100 (<sup>13</sup>C) MHz and Unity NMR at 500 (<sup>1</sup>H) or 125 (<sup>13</sup>C) MHz. Chemical shifts are reported in ppm relative to tetramethylsilane or residual protiated solvent. All <sup>13</sup>C NMR spectra were proton decoupled. Infrared spectroscopic data was recorded on sodium chloride plates as thin films on a Perkin-Elmer Paragon 500 FT-IR spectrometer. Chiral HPLC analysis was performed on a Thermo Separation Products Spectra Series P-100 and on an Agilent Technologies 1200 Series using Chiralcel® columns. Optical rotations were measured on a Jasco DIP-1000 digital polarimeter using 5 cm glass cells with a Na 589 nm filter.

## B. Absolute Stereochemistry

The absolute sense of chirality for *trans*-**3a** was determined preparing mandelamides **31** and **32** from cyclopentylamine **30**.<sup>vii</sup> The downfield shift of Me<sub>a</sub> ( $\delta$  1.38) in **31** compared to Me<sub>a</sub> ( $\delta$  1.29) in **32**, and the reverse for H<sub>b</sub> ( $\delta$  2.83, 2.20 for **31** vs  $\delta$  2.90, 2.30 for **32**) is consistent with the absolute stereochemistry as depicted.

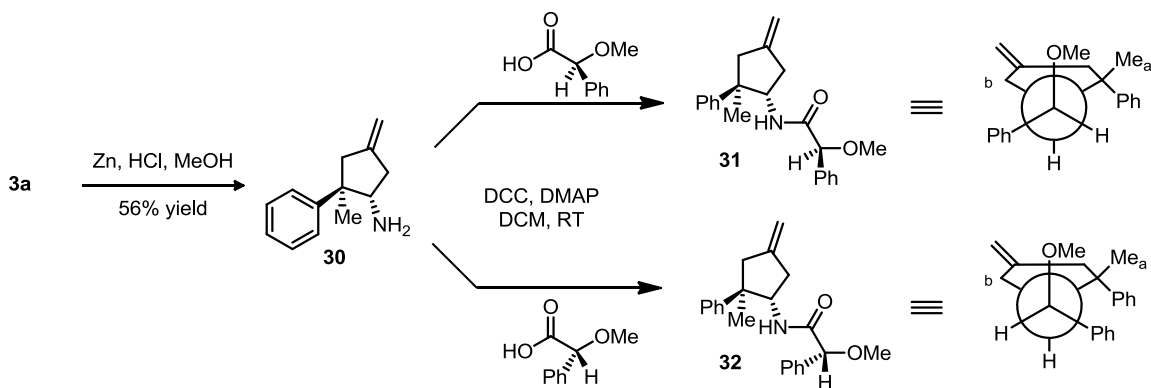

**Scheme S1.** Preparation of diastereomeric mandelamides **31** and **32**.

The absolute sense of chirality for **21** was determined by x-ray crystal analysis.

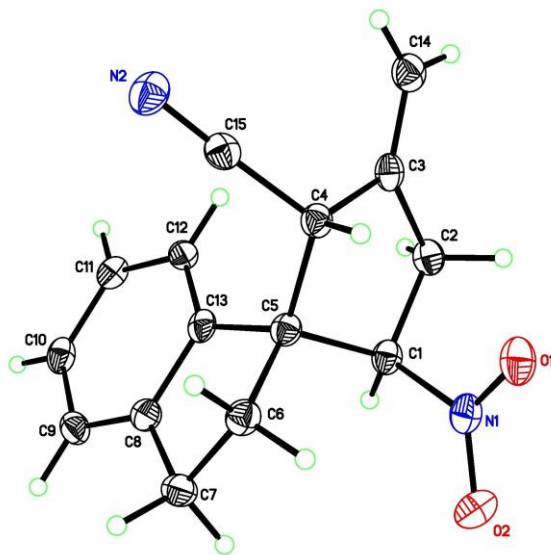

**Figure S1.** X-ray crystal structure of cyano donor adduct **21**.

## C. General Procedures

**General procedure A for the synthesis of nitroalkenes:** nitroalkenes were prepared according to the procedure of Stephens:<sup>viii</sup> a mixture of 1,1-disubstituted olefin (10 mmol), sodium nitrite (100 mmol), ceric ammonium nitrate (10 mmol) and acetic acid (120 mmol) in chloroform (100 mL) was sonicated for up to 6 hours in a sealed flask connected to a bubbler. Upon completion, the mixture was filtered and the cake was washed with diethyl ether (100 mL). The solution was quenched with sat. NaHCO<sub>3</sub> (75 mL), the aqueous layer was back-extracted with diethyl ether (75 mL), and the combined organic layers were washed with water (50 mL), brine (50 mL), dried over MgSO<sub>4</sub>, concentrated and purified by chromatography.

**General procedure B for cycloadditions with donor 1a:** To an argon-purged vial of substrate (0.076 mmol), ligand **L3** (0.0075 mmol) and Pd(dba)<sub>2</sub> (2.2 mg, 0.0038 mmol) was added either dioxane (0.5 mL) or toluene (0.15 mL) and the solution stirred for 2 minutes before 2-((trimethylsilyl)methyl)allyl acetate (25  $\mu$ L, 0.12 mmol) was added. After stirring for 4 hours at 50 °C, the solution was concentrated and purified by flash chromatography.

**General procedure C for cycloadditions with cyano donor 1b:** To an argon-purged vial of substrate (0.076 mmol), ligand **L3** (0.0075 mmol) and Pd(dba)<sub>2</sub> (2.2 mg, 0.0038 mmol) was added toluene (0.5 mL) and the solution moved to a cold room at 4°C. After 3 minutes, 1-cyano-2-((trimethylsilyl)methyl)allyl acetate (30  $\mu$ L, 0.12 mmol) was added and the reaction was allowed to stir for 1 hour at 4°C, after which it was immediately purified by flash chromatography.

## D. Nitroalkenes

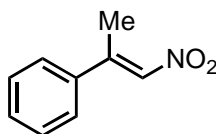

**(E)-(1-Nitroprop-1-en-2-yl)benzene (2):** The reaction was performed according to general procedure A with 5 mL (40 mmol) of  $\alpha$ -methylstyrene and purified by chromatography (2% diethyl ether in pet ether) to give the product as a pale yellow oil (2.75 g, 44% yield). Spectral properties matched known characterization.<sup>viii</sup>  $^1\text{H}$  NMR (500 MHz,  $\text{CDCl}_3$ ):  $\delta$  7.48-7.43 (m, 5H), 7.33-7.31 (m, 1H), 2.65 (d,  $J$  = 1.6 Hz, 3H).

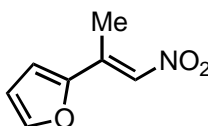

**(E)-2-(1-Nitroprop-1-en-2-yl)furan:** Adapted from the procedure of List and coworkers.<sup>ix</sup> A solution of 2-acetylfuran (6.7 g, 60 mmol), nitromethane (13 mL, 240 mmol) and *n*-butylamine (2.4 mL, 24 mmol) in toluene (43 mL) was heated at reflux using a Dean-Stark apparatus. After 17 hours, the solution was cooled, diluted with ethyl acetate (100 mL) and quenched with 1 M  $\text{NaHSO}_4$  (50 mL). The organic layer was dried over  $\text{MgSO}_4$ , concentrated and submitted to chromatography (1% diethyl ether in pet ether), then crystallized from diethyl ether/heptane (16 mL, 6:10) at  $-10^\circ\text{C}$  to provide the pure product as pale yellow crystals (1.4 g, 15% yield). Spectral properties matched known characterization.<sup>ix</sup>  $^1\text{H}$  NMR (400 MHz,  $\text{CDCl}_3$ ):  $\delta$  7.66 (br d,  $J$  = 1.2 Hz, 1H), 7.52 (d,  $J$  = 1.4 Hz, 1H), 6.88 (d,  $J$  = 3.9 Hz, 1H), 6.53 (dm,  $J$  = 3.9 Hz, 1H), 2.53 (d,  $J$  = 1.3 Hz, 3H).

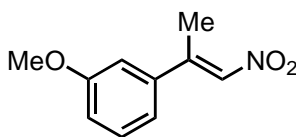

**(E)-1-Methoxy-3-(1-nitroprop-1-en-2-yl)benzene:** The reaction was performed according to general procedure A with 2.58 g (20 mmol) of 3-methoxy- $\alpha$ -methylstyrene and purified by chromatography (5% diethyl ether in pet ether) to give the product as a pale yellow solid (1.71 g, 47% yield). Spectral properties matched known characterization.<sup>viii</sup>  $^1\text{H}$  NMR (400 MHz,  $\text{CDCl}_3$ ):  $\delta$  7.37-7.30 (m, 2H), 7.05-6.94 (m, 3H), 3.85 (s, 3H), 2.63 (s, 3H).

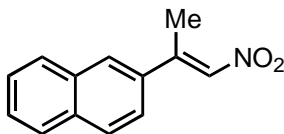

**(E)-2-(1-Nitroprop-1-en-2-yl)naphthalene:** The reaction was performed according to general procedure A with 3.2 g (19.3 mmol) of 2-(2-naphthyl)-1-propene and purified by flash chromatography (1% ether in pet ether) to give the product as a pale yellow solid (1.99 g, 48% yield). Spectral properties matched known characterization.<sup>ix</sup> <sup>1</sup>H NMR (500 MHz, CDCl<sub>3</sub>): δ 7.94-7.84 (m, 4H), 7.57-7.53 (m, 2H), 7.50 (dd, *J* = 2.0, 9.0 Hz, 1H), 7.44 (quartet, *J* = 1.3 Hz, 1H), 2.73 (d, *J* = 1.3 Hz, 3H).

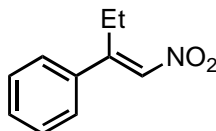

**(E)-(1-Nitrobut-1-en-2-yl)benzene:** The reaction was performed according to general procedure A with 3.2 g (24.4 mmol) of α-ethylstyrene and purified by flash chromatography (2% diethyl ether in pet ether) to give the product as a pale yellow oil (1.74 g, 40% yield). Spectral properties matched known characterization.<sup>ix</sup> <sup>1</sup>H NMR (400 MHz, CDCl<sub>3</sub>): δ 7.47-7.42 (m, 5H), 7.19 (s, 1H), 3.09 (q, *J* = 7.6 Hz, 2H), 1.16 (t, *J* = 7.6 Hz, 3H).

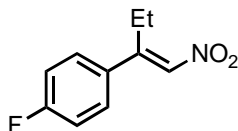

**(E)-1-Fluoro-4-(1-nitrobut-1-en-2-yl)benzene:** The reaction was performed according to general procedure A with 4.4 g (29.0 mmol) of 4-fluoro-α-methylstyrene and purified by flash chromatography (2% diethyl ether in pet ether) to give the product as a pale yellow oil (1.66 g, 29% yield). <sup>1</sup>H NMR (400 MHz, CDCl<sub>3</sub>): δ 7.44-7.38 (m, 2H), 7.15-7.08 (m, 3H), 3.04 (q, *J* = 7.5 Hz, 2H), 1.13 (t, *J* = 7.5 Hz, 3H). <sup>13</sup>C NMR (100 MHz, CDCl<sub>3</sub>): δ 165.3 (d, *J* = 250 Hz), 154.9, 136.0, 133.3 (d, *J* = 3.7 Hz), 129.5 (d, *J* = 8.2 Hz), 116.5 (d, *J* = 21.6 Hz), 25.2, 13.1. IR (thin film): 3104, 2978, 2878, 1602, 1510, 1643, 1340 cm<sup>-1</sup>.

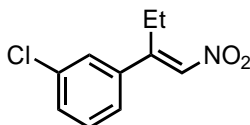

**(E)-1-Chloro-3-(1-nitrobut-1-en-2-yl)benzene:** The reaction was performed according to general procedure A with 4.1 g (24.4 mmol) of 4-chloro- $\alpha$ -methylstyrene and purified by flash chromatography (3% diethyl ether in pet ether) to give the product as a pale yellow oil (1.77 g, 34% yield).  $^1\text{H}$  NMR (400 MHz,  $\text{CDCl}_3$ ):  $\delta$  7.43-7.24 (m, 4H), 7.13 (s, 1H), 3.02 (q,  $J = 7.6$  Hz, 2H), 1.13 (t,  $J = 7.6$  Hz, 3H).  $^{13}\text{C}$  NMR (100 MHz,  $\text{CDCl}_3$ ):  $\delta$  154.3, 139.2, 136.6, 135.4, 130.7, 130.5, 127.6, 125.6, 25.1, 13.0. IR (thin film): 3102, 2977, 2938, 1620, 1564, 1519, 1462, 1342  $\text{cm}^{-1}$ .

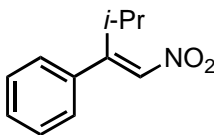

**(E)-(3-Methyl-1-nitrobut-1-en-2-yl)benzene:** The reaction was performed according to general procedure A with 2.1 g (14.6 mmol) of  $\alpha$ -isopropylstyrene and purified by flash chromatography (pet ether) to give the product as a pale yellow oil (600 mg, 21% yield). Spectral properties matched known characterization.<sup>x</sup>  $^1\text{H}$  NMR (400 MHz,  $\text{CDCl}_3$ ):  $\delta$  7.42-7.37 (m, 3H), 7.24-7.20 (m, 2H), 6.89 (s, 1H), 3.96 (septet,  $J = 6.9$  Hz, 1H), 1.13 (d,  $J = 6.9$  Hz, 6H).

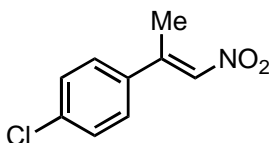

**(E)-1-Chloro-4-(1-nitroprop-1-en-2-yl)benzene:** The reaction was performed according to general procedure A with 3.0 g (20 mmol) of 4-chloro- $\alpha$ -methylstyrene and purified by chromatography (1% diethyl ether in pet ether) to give the product as a pale yellow oil (2.17 g, 56% yield). Spectral properties matched known characterization.<sup>viii</sup>  $^1\text{H}$  NMR (400 MHz,  $\text{CDCl}_3$ ):  $\delta$  7.44-7.38 (m, 4H), 7.29-7.28 (m, 1H), 2.62 (s, 3H).

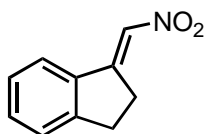

**(E)-1-(Nitromethylene)-2,3-dihydro-1H-indene:** The reaction was performed according to general procedure A with 2.2 g (16.9 mmol) of 1-methylene-2,3-dihydro-1H-indene and purified by flash chromatography (10% ethyl acetate in hexanes) to give the product as a pale yellow solid (380 mg, 13% yield), mp 80-81 °C. <sup>1</sup>H NMR (500 MHz, CDCl<sub>3</sub>): δ 7.70 (t, *J* = 2.2 Hz, 1H), 7.59 (d, *J* = 7.9 Hz, 1H), 7.48 (t, *J* = 7.3 Hz, 1H), 7.43 (d, *J* = 7.9 Hz, 1H), 7.32 (t, *J* = 7.3 Hz, 1H), 3.53-3.49 (m, 2H), 3.16 (t, *J* = 5.6 Hz, 2H). <sup>13</sup>C NMR (125 MHz, CDCl<sub>3</sub>): δ 159.2, 151.4, 136.9, 133.2, 130.0, 127.7, 126.3, 122.6, 32.2, 31.0. IR (thin film): 3091, 2919, 1619, 1597, 1499, 1329 cm<sup>-1</sup>.

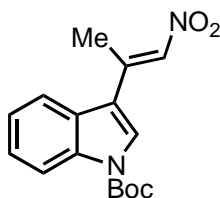

**(E)-tert-butyl 3-(1-nitroprop-1-en-2-yl)-1H-indole-1-carboxylate:** The reaction was performed according to general procedure A with 0.8 g (3.11 mmol) of *tert*-butyl 3-(prop-1-en-2-yl)-1H-indole-1-carboxylate and purified by flash chromatography (5% ethyl acetate in hexanes) to give the product as a bright yellow solid (183 mg, 19% yield), mp 105 °C. <sup>1</sup>H NMR (500 MHz, CDCl<sub>3</sub>): δ 8.21 (d, *J* = 8.3 Hz, 1 H), 7.93 (s, 1 H), 7.75 (d, *J* = 8.0 Hz, 1 H), 7.66 (m, 1 H), 7.42-7.33 (comp, 2 H), 2.72 (d, *J* = 1.2 Hz, 3 H), 1.71 (s, 9 H). <sup>13</sup>C NMR (125 MHz, CDCl<sub>3</sub>): δ 148.9, 143.6, 136.1, 135.4, 127.8, 126.6, 123.8, 120.2, 118.9, 115.8, 85.2, 28.1, 18.5. IR (thin film): 2878, 1716, 1587, 1317, 1133 cm<sup>-1</sup>.

## E. TMM Cycloadducts

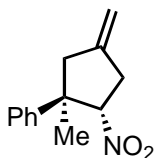

**((1R,2S)-1-Methyl-4-methylene-2-nitrocyclopentyl)benzene (3a):** A mixture of

Pd(dba)<sub>2</sub> (4.4 mg, 0.0076 mmol) and ligand **L3** (9.6 mg, 0.015 mmol) was purged with argon for 15 minutes. Dioxane (1.0 mL) was added followed by nitroalkene (24.8 mg, 21.5  $\mu$ L, 0.15 mmol) and the solution was stirred for 2 minutes before 2-((trimethylsilyl)methyl)allyl acetate (50  $\mu$ L, 0.24 mmol) was added. The solution was immersed in a 50 °C oil bath and stirred for 4 hours. It was then cooled, concentrated and purified by flash chromatography (4% to 7% diethyl ether in pet ether). The diastereomers thus separated could be independently characterized, but in this case they were recombined to give a clear, colorless oil (24.7 mg, 75% yield, dr 2:1 as determined by <sup>1</sup>H NMR, 92% ee and 43% ee, respectively). <sup>1</sup>H NMR (400 MHz, CDCl<sub>3</sub>):  $\delta$  7.44-7.23 (m, 5H), 5.14 (quintet, *J* = 2.3 Hz, 1H), 5.10 (dd, *J* = 3.2, 7.0 Hz, 1H), 5.03 (quintet, *J* = 2.3 Hz, 1H), 3.07-3.00 (m, 2H), 2.82-2.76 (m, 1H), 2.72-2.63 (m, 1H), 1.42 (s, 3H). <sup>13</sup>C NMR (100 MHz, CDCl<sub>3</sub>):  $\delta$  146.3, 144.5, 129.1, 127.5, 126.4, 108.5, 95.6, 51.1, 44.9, 36.1, 23.9. IR (thin film): 3061, 2974, 1664, 1548, 1497, 1448, 1366, 1309 cm<sup>-1</sup>. [ $\alpha$ ]<sub>24</sub><sup>D</sup> = +55.6 (c 0.76, CHCl<sub>3</sub>). Chiral HPLC: Chiralpak IA, 0.8 mL/min, 0.33% *i*-PrOH in heptane,  $\lambda$  = 220 nm, *t*<sub>R, minor</sub> = 11.0 min, *t*<sub>R, major</sub> = 12.1 min. HRMS: calcd for (M+Na<sup>+</sup>) C<sub>13</sub>H<sub>15</sub>NO<sub>2</sub>Na 240.1001; found 240.1005. R<sub>f</sub> 0.45 (10% diethyl ether in pet ether).

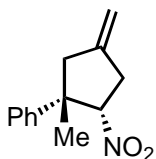

**((1S,2S)-1-Methyl-4-methylene-2-nitrocyclopentyl)benzene (3b)**: <sup>1</sup>H NMR (400 MHz, CDCl<sub>3</sub>):  $\delta$  7.33-7.20 (m, 5H), 5.21-5.18 (m, 1H), 5.13 (dd, *J* = 3.6, 5.9 Hz, 1H), 5.10-5.08 (m, 1H), 3.55 (d, *J* = 15.8 Hz, 1H), 3.05-3.01 (m, 2H), 2.56 (d, *J* = 15.8 Hz, 1H), 1.37 (s, 3H). <sup>13</sup>C NMR (100 MHz, CDCl<sub>3</sub>):  $\delta$  146.1, 142.8, 128.9, 127.5, 126.3, 109.7, 95.2, 52.4, 43.0, 37.2, 29.5. IR (thin film): 3062, 2969, 2929, 1665, 1549, 1497, 1447, 1369, 1307 cm<sup>-1</sup>. [ $\alpha$ ]<sub>24</sub><sup>D</sup> = +48.9 (c 0.31, CHCl<sub>3</sub>). Chiral HPLC: Chiralpak IB, 0.8 mL/min, 1% *i*-PrOH in heptane,  $\lambda$  = 220 nm, *t*<sub>R, major</sub> = 9.9 min, *t*<sub>R, minor</sub> = 11.5 min. R<sub>f</sub> 0.26 (10% diethyl ether in pet ether).

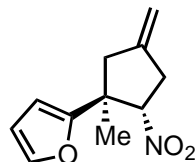

**2-((1S,2S)-1-Methyl-4-methylene-2-nitrocyclopentyl)furan (5a):** The reaction was performed with 11.6 mg (0.076 mmol) of nitroalkene according to general procedure B in dioxane at 50 °C and purified by flash chromatography (5% diethyl ether in pet ether) to give the diastereomeric products as clear, colorless oils (9.3 mg and 2.9 mg, 77% combined yield, 80% ee and 81% ee, respectively). <sup>1</sup>H NMR (400 MHz, CDCl<sub>3</sub>): δ 7.38 (dd, *J* = 0.9, 1.9 Hz, 1H), 6.31 (dd, *J* = 1.9, 3.3 Hz, 1H), 6.16 (dd, *J* = 0.9, 3.3 Hz, 1H), 5.21 (dd, *J* = 5.3, 7.7 Hz, 1H), 5.07 (quintet, *J* = 2.1 Hz, 1H), 5.02 (quintet, *J* = 2.1 Hz, 1H), 3.13 (ddq, *J* = 2.1, 2.1, 2.1, 5.3, 18.1 Hz, 1H), 2.94 (dq, *J* = 2.1, 16.4 Hz, 1H), 2.85 (ddq, *J* = 2.1, 2.1, 2.1, 7.7, 18.1 Hz, 1H), 2.67 (dq, *J* = 2.1, 16.4 Hz, 1H), 1.35 (s, 3H). <sup>13</sup>C NMR (100 MHz, CDCl<sub>3</sub>): δ 156.8, 145.1, 142.4, 110.6, 109.1, 106.4, 92.1, 48.1, 44.5, 35.6, 20.1. IR (thin film): 3122, 3080, 2982, 2940, 1664, 1554, 1505, 1434, 1367, 1316 cm<sup>-1</sup>. [α]<sub>23</sub><sup>D</sup> = +60.5 (c 0.70, CHCl<sub>3</sub>). Chiral HPLC: Chiralpak IB, 0.8 mL/min, 1% *i*-PrOH in heptane, λ = 220 nm, *t*<sub>R, major</sub> = 9.2 min, *t*<sub>R, minor</sub> = 10.0 min. HRMS: calcd for (M+H<sup>+</sup>) C<sub>11</sub>H<sub>14</sub>NO<sub>3</sub> 208.0973; found 208.0963. R<sub>f</sub> 0.43 (10% diethyl ether in pet ether).

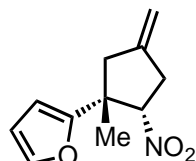

**2-((1R,2S)-1-Methyl-4-methylene-2-nitrocyclopentyl)furan (5b):** <sup>1</sup>H NMR (400 MHz, CDCl<sub>3</sub>): δ 7.32 (dd, *J* = 0.8, 1.9, Hz, 1H), 6.27 (dd, *J* = 1.9, 3.3 Hz, 1H), 6.14 (dd, *J* = 0.8, 3.3 Hz, 1H), 5.11 (quintet, *J* = 2.1 Hz, 1H), 5.06 (quintet, *J* = 2.1 Hz, 1H), 4.87 (dd, *J* = 4.1, 7.2 Hz, 1H), 3.28-3.21 (m, 1H), 3.18-3.10 (m, 1H), 2.88 (ddq, *J* = 2.1, 2.1, 2.1, 7.2, 18.2 Hz, 1H), 2.43 (ddq, *J* = 0.5, 1.7, 1.7, 1.7, 16.1 Hz, 1H), 1.48 (d, *J* = 0.5 Hz, 3H). <sup>13</sup>C NMR (100 MHz, CDCl<sub>3</sub>): δ 155.0, 145.0, 142.8, 110.5, 109.6, 106.9, 94.2, 48.8, 43.4, 36.2, 25.1. IR (thin film): 3121, 3079, 2978, 2934, 1664, 1554, 1504, 1434, 1370, 1312 cm<sup>-1</sup>. [α]<sub>25</sub><sup>D</sup> = +74.8 (c 0.39, CHCl<sub>3</sub>). Chiral HPLC: Chiralpak IA, 0.8 mL/min, 1% *i*-

PrOH in heptane,  $\lambda = 220$  nm,  $t_{R, \text{major}} = 9.1$  min,  $t_{R, \text{minor}} = 14.4$  min.  $R_f$  0.30 (10% diethyl ether in pet ether).

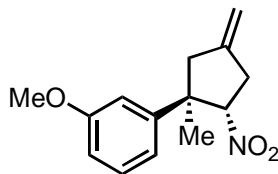

**1-Methoxy-3-((1R,2S)-1-methyl-4-methylene-2-nitrocyclopentyl)benzene (6a):** The reaction was performed with 14.7 mg (0.076 mmol) of nitroalkene according to general procedure B in dioxane at 50 °C, but 3.3 mg  $\text{Pd}(\text{dba})_2$  and 7.2 mg ligand **L3** were used. The reaction was concentrated and purified by successive flash chromatography (50% dichloromethane in pet ether, then 7% to 10% diethyl ether in pet ether) to give the diastereomeric products as clear, colorless oils (8.0 mg and 3.7 mg, 62% combined yield, 96% ee and 41% ee, respectively).  $^1\text{H}$  NMR (400 MHz,  $\text{CDCl}_3$ ):  $\delta$  7.28 (t,  $J = 8.2$  Hz, 1H), 7.00 (ddd,  $J = 0.9, 1.8, 7.8$  Hz, 1H), 6.96 (t,  $J = 2.4$  Hz, 1H), 6.80 (ddd,  $J = 0.8, 2.4, 8.2$  Hz, 1H), 5.13 (quintet,  $J = 2.3$  Hz, 1H), 5.10 (dd,  $J = 3.4, 7.2$  Hz, 1H), 5.02 (quintet,  $J = 2.3$  Hz, 1H), 3.81 (s, 3H), 3.07-2.98 (m, 2H), 2.81-2.62 (m, 2H), 1.41 (s, 3H).  $^{13}\text{C}$  NMR (100 MHz,  $\text{CDCl}_3$ ):  $\delta$  160.1, 146.3, 146.3, 130.1, 118.8, 113.1, 112.0, 108.5, 95.5, 55.6, 51.1, 45.0, 36.1, 23.9. IR (thin film): 3078, 2967, 2837, 1663, 1602, 1550, 1491, 1367  $\text{cm}^{-1}$ .  $[\alpha]_{26}^D = +61.6$  (c 0.76,  $\text{CHCl}_3$ ). Chiral HPLC: Chiralpak IB, 0.8 mL/min, 1% *i*-PrOH in heptane,  $\lambda = 220$  nm,  $t_{R, \text{minor}} = 12.2$  min,  $t_{R, \text{major}} = 12.9$  min. HRMS: calcd for the amine ( $\text{M}+\text{H}^+$ )  $\text{C}_{14}\text{H}_{20}\text{NO}$  218.1545; found 218.1544.  $R_f$  0.33 (10% diethyl ether in pet ether).

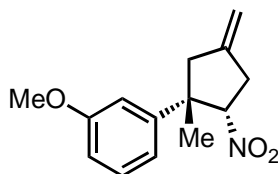

**1-Methoxy-3-((1S,2S)-1-methyl-4-methylene-2-nitrocyclopentyl)benzene (6b):**  $^1\text{H}$  NMR (400 MHz,  $\text{CDCl}_3$ ):  $\delta$  7.23 (t,  $J = 8.0$  Hz, 1H), 6.86 (ddd,  $J = 0.9, 1.7, 7.7$  Hz, 1H), 6.81 (t,  $J = 2.1$  Hz, 1H), 6.77 (ddd,  $J = 0.9, 2.5, 8.2$  Hz, 1H), 5.20-5.17 (m, 1H), 5.11 (dd,  $J = 3.4, 6.1$  Hz, 1H), 5.09-5.06 (m, 1H), 3.79 (s, 3H), 3.52 (d,  $J = 15.5$  Hz, 1H), 3.05-3.00

(m, 2H), 2.55 (d,  $J = 15.5$  Hz, 1H), 1.35 (d,  $J = 0.8$  Hz, 3H).  $^{13}\text{C}$  NMR (100 MHz,  $\text{CDCl}_3$ ):  $\delta$  159.9, 146.1, 144.5, 129.9, 118.6, 112.9, 112.2, 109.7, 95.1, 55.5, 52.4, 43.2, 37.3, 29.6. IR (thin film): 3078, 2967, 2836, 1662, 1604, 1550, 1489, 1432,  $1370\text{ cm}^{-1}$ .  $[\alpha]_{26}^{\text{D}} = +71.4$  (c 0.31,  $\text{CHCl}_3$ ). Chiral HPLC: Chiralpak AD-H, 0.8 mL/min, 5% *i*-PrOH in heptane,  $\lambda = 220$  nm,  $t_{\text{R, minor}} = 9.2$  min,  $t_{\text{R, major}} = 11.8$  min.  $R_f$  0.23 (10% diethyl ether in pet ether).

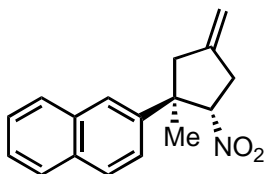

**2-((1R,2S)-1-Methyl-4-methylene-2-nitrocyclopentyl)naphthalene (7a):** The reaction was performed with 16.2 mg (0.076 mmol) of nitroalkene according to general procedure B in dioxane at  $50\text{ }^{\circ}\text{C}$  and purified by successive flash chromatography (25% dichloromethane in pet ether, then 5% diethyl ether in pet ether) to give the diastereomeric products as clear, colorless oils (10.0 mg and 4.3 mg, 70% combined yield, 96% ee and 78% ee, respectively).  $^1\text{H}$  NMR (400 MHz,  $\text{CDCl}_3$ ):  $\delta$  7.87-7.78 (m, 4H), 7.56-7.46 (m, 3H), 5.22 (dd,  $J = 3.7, 7.4$  Hz, 1H), 5.20-5.17 (m, 1H), 5.06-5.03 (m, 1H), 3.17 (d,  $J = 16.9$  Hz, 1H), 3.10-3.03 (m, 1H), 2.86 (dd,  $J = 2.5, 16.9$  Hz, 1H), 2.69 (ddq,  $J = 2.1, 2.1, 2.1, 7.1, 18.1$  Hz, 1H), 1.50 (s, 3H).  $^{13}\text{C}$  NMR (100 MHz,  $\text{CDCl}_3$ ):  $\delta$  146.2, 141.6, 133.5, 132.6, 129.0, 128.5, 127.8, 126.8, 126.6, 125.2, 124.6, 108.6, 95.3, 51.2, 45.0, 36.1, 23.8. IR (thin film): 3058, 2973, 1663, 1599, 1547, 1506, 1456,  $1366\text{ cm}^{-1}$ .  $[\alpha]_{26}^{\text{D}} = +93.1$  (c 1.0,  $\text{CHCl}_3$ ). Chiral HPLC: Chiralpak OJ-H, 0.8 mL/min, 1% *i*-PrOH in heptane,  $\lambda = 254$  nm,  $t_{\text{R, major}} = 37.2$  min,  $t_{\text{R, minor}} = 49.7$  min. HRMS: calcd for the amine ( $\text{M}+\text{H}^+$ )  $\text{C}_{17}\text{H}_{20}\text{N}$  238.1595; found 238.1602.  $R_f$  0.44 (10% diethyl ether in pet ether).

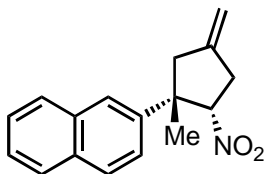

**2-((1*S*,2*S*)-1-Methyl-4-methylene-2-nitrocyclopentyl)naphthalene (7b):**  $^1\text{H}$  NMR (400 MHz,  $\text{CDCl}_3$ ):  $\delta$  7.80-7.76 (m, 3H), 7.67 (d,  $J = 1.9$  Hz, 1H), 7.46-7.41 (m, 3H), 5.23-5.20 (m, 2H), 5.11-5.09 (m, 1H), 3.67 (d,  $J = 14.9$  Hz, 1H), 3.06-3.01 (m, 2H), 2.65 (d,  $J = 14.9$  Hz, 1H), 1.40 (s, 3H).  $^{13}\text{C}$  NMR (100 MHz,  $\text{CDCl}_3$ ):  $\delta$  146.1, 140.2, 133.5, 132.7, 128.5, 128.3, 127.8, 126.5, 126.3, 125.1, 124.6, 109.8, 95.1, 52.6, 43.1, 37.2, 29.4. IR (thin film): 3057, 2969, 2927, 1663, 1600, 1549, 1506, 1370  $\text{cm}^{-1}$ .  $[\alpha]_{26}^{\text{D}} = +105.7$  (c 0.43,  $\text{CHCl}_3$ ). Chiral HPLC: Chiralpak AD-H, 0.8 mL/min, 1% *i*-PrOH in heptane,  $\lambda = \text{nm}$ ,  $t_{\text{R, major}} = 17.0$  min,  $t_{\text{R, minor}} = 19.2$  min.  $R_f$  0.28 (10% diethyl ether in pet ether).

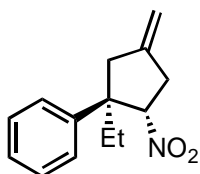

**((1*R*,2*S*)-1-Ethyl-4-methylene-2-nitrocyclopentyl)benzene (8a):** The reaction was performed with 13.5 mg (12.0  $\mu\text{L}$ , 0.076 mmol) of nitroalkene according to general procedure B in toluene and purified by flash chromatography (4% to 8% diethyl ether in pet ether) to give the diastereomeric products as clear, colorless oils (13.1 mg and 2.1 mg, 87% combined yield, 90% ee and 67% ee, respectively).  $^1\text{H}$  NMR (400 MHz,  $\text{CDCl}_3$ ):  $\delta$  7.39-7.24 (m, 5H), 5.18 (bs, 1H), 5.08 (d,  $J = 6.6$  Hz, 1H), 5.00 (bs, 1H), 3.15 (d,  $J = 17.0$  Hz, 1H), 2.88 (d,  $J = 18.3$  Hz, 1H), 2.77 (dd,  $J = 2.8, 17.0$  Hz, 1H), 2.55-2.46 (m, 1H), 2.13 (dq,  $J = 7.6, 14.9$  Hz, 1H), 1.44 (dq,  $J = 7.6, 14.9$  Hz, 1H), 0.60 (t,  $J = 7.6$  Hz, 3H).  $^{13}\text{C}$  NMR (100 MHz,  $\text{CDCl}_3$ ):  $\delta$  147.0, 141.8, 129.1, 127.5, 127.2, 108.1, 96.9, 56.0, 40.2, 36.3, 30.5, 9.7. IR (thin film): 2970, 1650, 1548, 1449, 1365  $\text{cm}^{-1}$ .  $[\alpha]_{23}^{\text{D}} = +6.1$  (c 1.07,  $\text{CHCl}_3$ ). Chiral HPLC: Chiralpak IB, 0.8 mL/min, 1% *i*-PrOH in heptane,  $\lambda = 220$  nm,  $t_{\text{R, minor}} = 6.5$  min,  $t_{\text{R, major}} = 7.0$  min. HRMS: calcd for  $(\text{M}+\text{H}^+)$   $\text{C}_{14}\text{H}_{18}\text{NO}_2$  232.1337; found 232.1324.  $R_f$  0.51 (10% diethyl ether in pet ether).

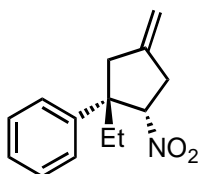

**((1*S*,2*S*)-1-Ethyl-4-methylene-2-nitrocyclopentyl)benzene (8b):**  $^1\text{H}$  NMR (400 MHz,  $\text{CDCl}_3$ ):  $\delta$  7.32-7.19 (m, 5H), 5.19-5.13 (m, 2H), 5.06-5.04 (m, 1H), 3.42-3.35 (m, 1H), 3.02-2.98 (m, 2H), 2.70 (d,  $J = 16.2$  Hz, 1H), 1.80-1.70 (m, 1H), 1.61-1.52 (m, 1H), 0.61 (t,  $J = 7.4$  Hz, 3H).  $^{13}\text{C}$  NMR (100 MHz,  $\text{CDCl}_3$ ):  $\delta$  146.1, 140.3, 128.6, 127.4, 127.2, 109.5, 95.2, 56.7, 39.3, 37.1, 32.8, 8.8. IR (thin film): 2970, 2930, 1650, 1550, 1498, 1447, 1368  $\text{cm}^{-1}$ .  $[\alpha]_{25}^{\text{D}} = +81.3$  (c 0.23,  $\text{CHCl}_3$ ). Chiral HPLC: Chiralpak AD-H, 0.8 mL/min, 1% *i*-PrOH in heptane,  $\lambda = 220$  nm,  $t_{\text{R, major}} = 9.2$  min,  $t_{\text{R, minor}} = 10.3$  min.  $R_f$  0.36 (10% diethyl ether in pet ether).

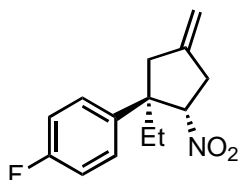

**1-((1*R*,2*S*)-1-Ethyl-4-methylene-2-nitrocyclopentyl)-4-fluorobenzene (9a):** The reaction was performed with 14.8 mg (12.5  $\mu\text{L}$ , 0.076 mmol) of nitroalkene according to general procedure B in toluene and purified by flash chromatography (5% to 7% diethyl ether in pet ether) to give the diastereomeric products as clear, colorless oils (15.4 mg and 2.3 mg, 93% combined yield, 95% ee and 52% ee, respectively).  $^1\text{H}$  NMR (400 MHz,  $\text{CDCl}_3$ ):  $\delta$  7.35 (dd,  $J = 5.2, 9.0$  Hz, 2H), 7.05 (dd,  $J = 8.5, 9.0$  Hz, 2H), 5.11 (bs, 1H), 5.03-5.00 (m, 2H), 3.10 (d,  $J = 16.5$  Hz, 1H), 2.89 (d,  $J = 18.4$  Hz, 1H), 2.82-2.75 (m, 1H), 2.55-2.46 (m, 1H), 2.09 (dq,  $J = 7.5, 13.5$  Hz, 1H), 1.44 (dq,  $J = 7.5, 13.5$  Hz, 1H), 0.60 (t,  $J = 7.5$  Hz, 3H).  $^{13}\text{C}$  NMR (100 MHz,  $\text{CDCl}_3$ ):  $\delta$  161.9 (d,  $J = 246$  Hz), 146.7, 137.5 (d,  $J = 3.1$  Hz), 129.0 (d,  $J = 8.4$  Hz), 116.0 (d,  $J = 21.2$  Hz), 108.4, 96.8, 55.5, 40.4, 36.2, 30.5, 9.6. IR (thin film): 2971, 2936, 1663, 1603, 1549, 1511, 1367  $\text{cm}^{-1}$ .  $[\alpha]_{25}^{\text{D}} = +24.8$  (c 1.54,  $\text{CHCl}_3$ ). Chiral HPLC: Chiralpak OJ-H, 0.8 mL/min, 0.2% *i*-PrOH in heptane,  $\lambda = 220$  nm,  $t_{\text{R, minor}} = 19.0$  min,  $t_{\text{R, major}} = 21.7$  min. HRMS: calcd for  $(\text{M}+\text{Na}^+)$   $\text{C}_{14}\text{H}_{16}\text{FNO}_2\text{Na}$  272.1063; found 272.1058.  $R_f$  0.47 (10% diethyl ether in pet ether).

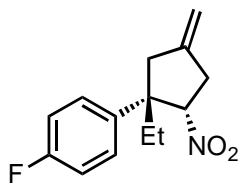

**1-((1S,2S)-1-Ethyl-4-methylene-2-nitrocyclopentyl)-4-fluorobenzene (9b):**  $^1\text{H}$  NMR (400 MHz,  $\text{CDCl}_3$ ):  $\delta$  7.18 (dd,  $J = 5.2, 8.6$  Hz, 2H), 7.00 (t,  $J = 8.6$  Hz, 2H), 5.18 (bs, 1H), 5.11 (t,  $J = 4.8$  Hz, 1H), 5.06 (bs, 1H), 3.34 (d,  $J = 15.6$  Hz, 1H), 3.02-2.99 (m, 2H), 2.69 (d,  $J = 15.6$  Hz, 1H), 1.78-1.68 (m, 1H), 1.62-1.52 (m, 1H), 0.61 (t,  $J = 7.4$  Hz, 3H).  $^{13}\text{C}$  NMR (100 MHz,  $\text{CDCl}_3$ ):  $\delta$  161.9 (d,  $J = 246$  Hz), 145.7, 135.9 (d,  $J = 3.7$  Hz), 128.8 (d,  $J = 7.4$  Hz), 115.4 (d,  $J = 20.9$  Hz), 109.6, 95.1, 56.1, 39.4, 36.9, 32.6, 8.6. IR (thin film): 2971, 2931, 1658, 1606, 1551, 1513, 1369  $\text{cm}^{-1}$ .  $[\alpha]_{25}^{\text{D}} = +54.4$  (c 0.29,  $\text{CHCl}_3$ ). Chiral HPLC: Chiralpak IC, 0.8 mL/min, 1% *i*-PrOH in heptane,  $\lambda = 220$  nm,  $t_{\text{R, major}} = 12.2$  min,  $t_{\text{R, minor}} = 13.4$  min.  $R_f$  0.29 (10% diethyl ether in pet ether).

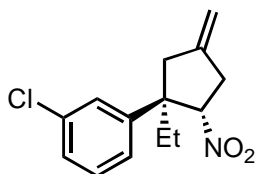

**1-Chloro-3-((1R,2S)-1-ethyl-4-methylene-2-nitrocyclopentyl)benzene (10a):** The reaction was performed with 16.1 mg (13  $\mu\text{L}$ , 0.076 mmol) of nitroalkene according to general procedure B in toluene and purified by flash chromatography (4% to 8% diethyl ether in pet ether) to give the diastereomeric products as clear, colorless oils (17.4 mg and 2.5 mg, 99% combined yield, 93% ee and 58% ee, respectively).  $^1\text{H}$  NMR (400 MHz,  $\text{CDCl}_3$ ):  $\delta$  7.35-7.24 (m, 4H), 5.20 (bs, 1H), 5.05-5.01 (m, 2H), 3.10 (d,  $J = 17.8$  Hz, 1H), 2.91 (d,  $J = 17.8$  Hz, 1H), 2.82-2.75 (m, 1H), 2.56-2.47 (m, 1H), 2.09 (dq,  $J = 7.5, 13.6$  Hz, 1H), 1.45 (dq,  $J = 7.5, 13.6$ , 1H), 0.61 (t,  $J = 7.5$  Hz, 3H).  $^{13}\text{C}$  NMR (100 MHz,  $\text{CDCl}_3$ ):  $\delta$  146.3, 144.2, 135.2, 130.4, 127.8, 127.6, 125.5, 108.6, 96.5, 55.9, 40.2, 36.2, 30.4, 9.7. IR (thin film): 2970, 1660, 1594, 1549, 1444, 1366  $\text{cm}^{-1}$ .  $[\alpha]_{25}^{\text{D}} = +27.6$  (c 1.74,  $\text{CHCl}_3$ ). Chiral HPLC: Chiralpak OD-H, 0.8 mL/min, 1% *i*-PrOH in heptane,  $\lambda = 220$  nm,  $t_{\text{R, minor}} = 8.2$  min,  $t_{\text{R, major}} = 9.2$  min. HRMS: calcd for  $(\text{M}+\text{H}^+)$   $\text{C}_{14}\text{H}_{17}\text{ClNO}_2$  266.0948; found 266.0934.  $R_f$  0.47 (10% diethyl ether in pet ether).

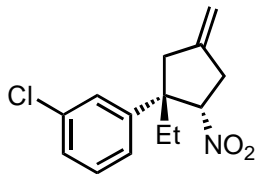

**1-Chloro-3-((1S,2S)-1-ethyl-4-methylene-2-nitrocyclopentyl)benzene (10b):**  $^1\text{H}$  NMR (400 MHz,  $\text{CDCl}_3$ ):  $\delta$  7.27-7.09 (m, 4H), 5.19 (bs, 1H), 5.12 (dd,  $J = 3.7, 5.9$  Hz, 1H), 5.06 (bs, 1H), 3.35 (dd,  $J = 1.8, 15.7$  Hz, 1H), 3.03-2.99 (m, 2H), 2.69 (d,  $J = 15.7$  Hz, 1H), 1.76-1.66 (m, 1H), 1.57 (dq,  $J = 7.5, 14.5$  Hz, 1H), 0.62 (t,  $J = 7.5$  Hz, 3H).  $^{13}\text{C}$  NMR (100 MHz,  $\text{CDCl}_3$ ):  $\delta$  145.5, 142.6, 134.6, 129.9, 127.7, 127.6, 125.4, 109.9, 95.0, 56.5, 39.2, 37.1, 32.7, 8.7. IR (thin film): 2971, 2932, 1655, 1597, 1550, 1421, 1368  $\text{cm}^{-1}$ .  $[\alpha]_{25}^{\text{D}} = +57.8$  (c 0.31,  $\text{CHCl}_3$ ). Chiral HPLC: Chiralpak IB, 0.8 mL/min, 1% *i*-PrOH in heptane,  $\lambda = 220$  nm,  $t_{\text{R, major}} = 8.4$  min,  $t_{\text{R, minor}} = 10.2$  min.  $R_f$  0.29 (10% diethyl ether in pet ether).

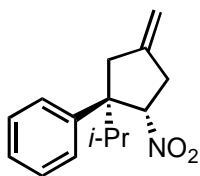

**((1R,2S)-1-Isopropyl-4-methylene-2-nitrocyclopentyl)benzene (11a):** The reaction was performed with 14.5 mg (13.5  $\mu\text{L}$ , 0.076 mmol) of nitroalkene according to general procedure B in toluene and purified by flash chromatography (33% dichloromethane in pet ether) to give the product as a clear, colorless oil (16.6 mg, 89% yield, 81% ee). The product was contaminated by approximately 6% of the nitroalkene, which could not be removed by chromatography.  $^1\text{H}$  NMR (400 MHz,  $\text{CDCl}_3$ ):  $\delta$  7.40-7.27 (m, 5H), 5.65 (d,  $J = 6.5$  Hz, 1H), 5.08-5.05 (m, 1H), 4.87-4.84 (m, 1H), 3.31-3.24 (m, 1H), 2.96-2.89 (m, 1H), 2.84-2.77 (m, 1H), 2.41 (ddq,  $J = 2.7, 2.7, 2.7, 6.5, 18.5$  Hz, 1H), 1.80 (septet,  $J = 6.8$  Hz, 1H), 0.91 (d,  $J = 6.8$  Hz, 3H), 0.69 (d,  $J = 6.8$  Hz, 3H).  $^{13}\text{C}$  NMR (100 MHz,  $\text{CDCl}_3$ ):  $\delta$  146.0, 136.8, 128.5, 128.4, 127.6, 108.3, 94.1, 60.1, 41.4, 37.0, 34.5, 19.7, 19.3. IR (thin film): 3060, 2969, 1667, 1599, 1554, 1447, 1367, 1308  $\text{cm}^{-1}$ .  $[\alpha]_{24}^{\text{D}} = +58.9$  (c 1.05,  $\text{CHCl}_3$ ). Chiral HPLC: Chiralpak IC, 0.8 mL/min, 0.2% *i*-PrOH in heptane,  $\lambda = 220$  nm,  $t_{\text{R, major}} = 19.1$  min,  $t_{\text{R, minor}} = 21.8$  min. HRMS: calcd for the amine ( $\text{M}+\text{H}^+$ )  $\text{C}_{15}\text{H}_{22}\text{N}$  216.1752; found 216.1752.  $R_f$  0.49 (40% dichloromethane in pet ether).

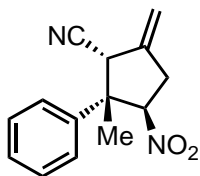

**(1S,2R,3S)-2-Methyl-5-methylene-3-nitro-2-phenylcyclopentanecarbonitrile (12):**

The reaction was performed with 12.7 mg (0.078 mmol) of nitroalkene according to general procedure C and purified by flash chromatography (13% ethyl acetate in hexanes) to give the product as a white solid (18.3 mg, 97% yield, 92% ee), mp 67-69 °C. <sup>1</sup>H NMR (400 MHz, CDCl<sub>3</sub>): δ 7.50-7.31 (m, 5H), 5.60 (q, *J* = 2.5 Hz, 1H), 5.36 (q, *J* = 2.5 Hz, 1H), 5.05 (dd, *J* = 1.5, 7.2 Hz, 1H), 4.19-4.16 (m, 1H), 3.15-3.07 (dm, *J* = 19.0 Hz, 1H), 2.90 (ddq, *J* = 2.5, 2.5, 2.5, 7.2, 19.0 Hz, 1H), 1.67 (s, 3H). <sup>13</sup>C NMR (100 MHz, CDCl<sub>3</sub>): δ 142.1, 139.7, 129.4, 128.7, 126.7, 117.6, 111.7, 94.4, 53.6, 45.7, 35.2, 22.8. IR (thin film): 2986, 2244, 1665, 1551, 1499, 1446, 1366, 1302 cm<sup>-1</sup>. [α]<sub>23</sub><sup>D</sup> = -0.6 (c 0.89, CHCl<sub>3</sub>). Chiral HPLC: Chiralpak AD-H, 0.8 mL/min, 1% *i*-PrOH in heptane, λ = 220 nm, *t*<sub>R, minor</sub> = 21.2 min, *t*<sub>R, major</sub> = 27.0 min. HRMS: calcd for the amine (M+Na<sup>+</sup>) C<sub>14</sub>H<sub>16</sub>N<sub>2</sub>Na 235.1211; found 235.1217. R<sub>f</sub> 0.18 (15% ethyl acetate in hexanes).

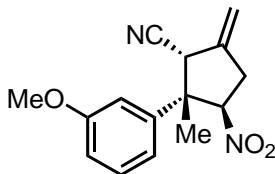

**(1S,2R,3S)-2-(3-Methoxyphenyl)-2-methyl-5-methylene-3-**

**nitrocyclopentanecarbonitrile (13):** The reaction was performed with 14.7 mg (0.076 mmol) of nitroalkene according to general procedure C and purified by flash chromatography (20% ethyl acetate in hexanes) to give the product as a clear, colorless oil (20.6 mg, 100% yield, 90% ee) that solidified on standing, mp 102-104 °C. <sup>1</sup>H NMR (400 MHz, CDCl<sub>3</sub>): δ 7.31 (t, *J* = 8.1 Hz, 1H), 7.05 (ddd, *J* = 0.8, 2.2, 7.8 Hz, 1H), 7.03 (t, *J* = 2.2 Hz, 1H), 6.86 (ddd, *J* = 0.8, 2.4, 8.1 Hz, 1H), 5.60 (q, *J* = 2.6 Hz, 1H), 5.36-5.34 (m, 1H), 5.05 (dd, *J* = 1.7, 7.2 Hz, 1H), 4.18-4.15 (m, 1H), 3.81 (s, 3H), 3.14-3.07 (m, 1H), 2.92 (ddq, *J* = 2.6, 2.6, 2.6, 7.2, 19.0 Hz, 1H), 1.65 (s, 3H). <sup>13</sup>C NMR (100 MHz, CDCl<sub>3</sub>): δ 160.2, 142.2, 141.2, 130.4, 118.9, 117.6, 113.4, 113.4, 111.7, 94.4,

55.6, 53.6, 45.8, 35.2, 22.8. IR (thin film): 2939, 2244, 1665, 1603, 1552, 1494, 1463, 1432, 1366, 1295, 1243  $\text{cm}^{-1}$ .  $[\alpha]_{24}^D = +5.5$  (c 0.93,  $\text{CHCl}_3$ ). Chiral HPLC: Chiralpak AD-H, 0.8 mL/min, 1% *i*-PrOH in heptane,  $\lambda = 220$  nm,  $t_{R, \text{minor}} = 30.7$  min,  $t_{R, \text{major}} = 35.6$  min. HRMS: calcd for  $(\text{M}+\text{H}^+)$   $\text{C}_{15}\text{H}_{17}\text{N}_2\text{O}_3$  273.1239; found 273.1234.  $R_f$  0.40 (30% ethyl acetate in hexanes).

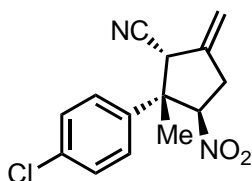

**(1R, 2S, 3R)-2-(4-Chlorophenyl)-2-methyl-5-methylene-3-nitrocyclopentanecarbonitrile (14):** The reaction was performed with 15.0 mg (0.076 mmol) of nitroalkene according to general procedure C and purified by flash chromatography (10% ethyl acetate in hexanes) to give the product as a light yellow oil (18.0 mg, 87% yield, >20:1 dr):  $^1\text{H}$  NMR (500 MHz,  $\text{CDCl}_3$ ):  $\delta$  7.43-7.40 (m, 2 H), 7.38-7.35 (m, 2 H), 5.60 (q,  $J = 2.4$  Hz, 1 H), 5.37 (dtd,  $J = 3.1, 2.1, 0.9$  Hz, 1 H), 5.00 (dd,  $J = 7.2, 1.7$  Hz, 1 H), 4.16 (s, 1 H), 3.14 (ddt,  $J = 19.0, 3.5, 1.9$  Hz, 1 H), 2.89 (ddq,  $J = 19.0, 7.2, 2.4$  Hz, 1 H), 1.65 (s, 3 H);  $^{13}\text{C}$  NMR (125 MHz,  $\text{CDCl}_3$ ):  $\delta$  141.3, 137.8, 134.5, 129.2, 127.8, 117.0, 111.9, 93.7, 52.9, 45.5, 34.8, 22.4; IR (neat): 2918, 2245, 1553  $\text{cm}^{-1}$ .  $[\alpha]_{23}^D = -7.90$  (c 1.0,  $\text{CHCl}_3$ ). Chiral HPLC: 99% ee, Chiralpak AD-H, 0.8 mL/min, 1% *i*-PrOH in heptane,  $\lambda = 220$  nm,  $t_{R, \text{minor}} = 30.1$  min,  $t_{R, \text{major}} = 39.4$  min. HRMS: calcd for the amine  $(\text{M} + \text{H})$   $\text{C}_{14}\text{H}_{16}\text{ClN}_2$  247.0924; found 247.0997.  $R_f$  0.41 (20% ethyl acetate in hexanes).

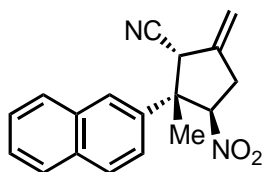

**(1R, 2S, 3R)-2-Methyl-5-methylene-2-(naphthalen-2-yl)-3-nitrocyclopentanecarbonitrile (15):** The reaction was performed with 16.0 mg (0.076 mmol) of nitroalkene according to general procedure C and purified by flash chromatography (10% ethyl acetate in hexanes) to give the product as a white solid (20.5

mg, 92% yield, >20:1 dr): mp = 158 °C;  $^1\text{H}$  NMR (500 MHz,  $\text{CDCl}_3$ ):  $\delta$  7.97 (d,  $J$  = 2.0 Hz, 1 H), 7.89 (d,  $J$  = 8.8 Hz, 1 H), 7.86-7.82 (m, 2 H), 7.57-7.51 (m, 3 H), 5.68 (q,  $J$  = 2.2 Hz, 1 H), 5.40 (q,  $J$  = 2.2 Hz, 1 H), 5.16 (dd,  $J$  = 7.2, 1.5 Hz, 1 H), 4.27 (br s, 1 H), 3.14 (d,  $J$  = 19.0 Hz, 1 H), 2.92 (ddq,  $J$  = 19.0, 7.2, 2.4 Hz, 1 H), 1.76 (s, 3 H);  $^{13}\text{C}$  NMR (125 MHz,  $\text{CDCl}_3$ ):  $\delta$  141.7, 136.4, 132.9, 132.5, 129.1, 128.4, 127.4, 127.0, 126.8, 125.8, 123.7, 117.3, 111.5, 93.9, 53.4, 45.4, 34.8, 22.6; IR (neat): 3056, 2245, 1552, 1363, 755  $\text{cm}^{-1}$ .  $[\alpha]_{23}^{\text{D}}$  = 32.33 (c 1.0,  $\text{CHCl}_3$ ). Chiral HPLC: 99% ee, Chiralpak AD-H, 0.8 mL/min, 1% *i*-PrOH in heptane,  $\lambda$  = 254 nm,  $t_{\text{R, minor}}$  = 36.2 min,  $t_{\text{R, major}}$  = 43.2 min. Mass: Anal calcd for  $\text{C}_{18}\text{H}_{16}\text{N}_2\text{O}_2$ : C, 73.95; H, 5.52; N, 9.58; found: C, 74.22; H, 5.59; N, 9.41.  $R_f$  0.26 (10% ethyl acetate in hexanes).

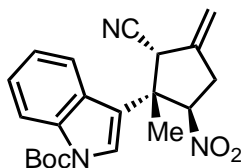

***tert*-Butyl-2((1*R*, 2*R*, 5*R*)-2-cyano-1-methyl-3-methylene-5-nitrocyclopentyl)-1*H*-indole-1-carboxylate (16):** The reaction was performed with 23.0 mg (0.076 mmol) of nitroalkene according to general procedure C and purified by flash chromatography (5% ethyl acetate in hexanes) to give the product as an oil (29.0 mg, >99% yield, >20:1 dr):  $^1\text{H}$  NMR (500 MHz,  $\text{CDCl}_3$ ):  $\delta$  8.21 (d,  $J$  = 7.6 Hz, 1 H), 7.88 (s, 1 H), 7.75 (d,  $J$  = 7.9 Hz, 1 H), 7.38 (t,  $J$  = 7.6 Hz, 1 H), 7.34-7.31 (m, 1 H), 5.68 (d,  $J$  = 2.5 Hz, 1 H), 5.43 (d,  $J$  = 6.3 Hz, 1 H), 5.34 (d,  $J$  = 2.4 Hz, 1 H), 4.22 (s, 1 H), 3.11 (d,  $J$  = 18.8 Hz, 1 H), 2.80 (ddq,  $J$  = 18.9, 7.2, 2.2 Hz, 1 H), 1.75 (s, 3 H), 1.66 (s, 9 H);  $^{13}\text{C}$  NMR (125 MHz,  $\text{CDCl}_3$ ):  $\delta$  150.1, 149.0, 140.6, 135.9, 127.2, 125.0, 124.1, 123.0, 119.8, 117.1, 115.9, 111.5, 90.8, 84.4, 50.2, 45.5, 34.5, 28.1, 21.1; IR (neat): 2979, 1738, 1553  $\text{cm}^{-1}$ .  $[\alpha]_{23}^{\text{D}}$  = 49.04 (c 2.0,  $\text{CHCl}_3$ ). Chiral HPLC: 95% ee, Chiralpak AD-H, 0.8 mL/min, 1% *i*-PrOH in heptane,  $\lambda$  = 254 nm,  $t_{\text{R, minor}}$  = 11.6 min,  $t_{\text{R, major}}$  = 16.2 min. HRMS: calcd for the amine ( $\text{M} + \text{H}$ )  $\text{C}_{21}\text{H}_{26}\text{N}_3\text{O}_2$  352.2025; found 352.2012.  $R_f$  0.20 (10% ethyl acetate in hexanes).

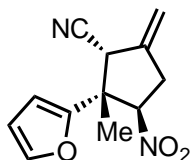

**(1R, 2R, 3R)-2-(Furan-2-yl)-2-methyl-5-methylene-3-nitrocyclopentanecarbonitrile (17):**

The reaction was performed with 12.0 mg (0.076 mmol) of nitroalkene according to general procedure C and purified by flash chromatography (10% ethyl acetate in hexanes) to give the product as an oil (17.1 mg, 97% yield, >20:1 dr):  $^1\text{H}$  NMR (500 MHz,  $\text{CDCl}_3$ ):  $\delta$  7.39 (dd,  $J = 1.9, 0.8$  Hz, 1 H), 6.42 (dd,  $J = 3.4, 0.8$  Hz, 1 H), 6.36 (dd,  $J = 3.4, 1.9$  Hz, 1 H), 5.50 (q,  $J = 2.5$  Hz, 1 H), 5.31 (dtd,  $J = 3.1, 2.1, 0.9$  Hz, 1 H), 5.14 (dd,  $J = 6.1, 3.0$  Hz, 1 H), 4.12–4.10 (m, 1 H), 3.16–3.13 (m, 2 H), 1.60 (s, 3 H);  $^{13}\text{C}$  NMR (125 MHz,  $\text{CDCl}_3$ ):  $\delta$  151.7, 143.0, 141.1, 116.7, 111.8, 110.7, 108.4, 91.6, 50.9, 45.2, 35.7, 19.4; IR (neat): 3125, 2909, 2247, 1554, 1367  $\text{cm}^{-1}$ .  $[\alpha]_{23}^{\text{D}} = -4.49$  (c 1.0,  $\text{CHCl}_3$ ). Chiral HPLC: >99% ee, Chiralpak IC, 0.8 mL/min, 1% *i*-PrOH in heptane,  $\lambda = 254$  nm,  $t_{\text{R, minor}} = 27.0$  min,  $t_{\text{R, major}} = 32.8$  min. HRMS: calcd for amine ( $\text{M} + \text{H}$ )  $\text{C}_{12}\text{H}_{15}\text{N}_2\text{O}$  203.1184; found 203.1178.  $R_f$  0.37 (20% ethyl acetate in hexanes).

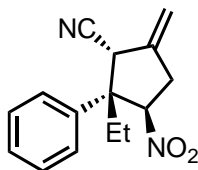

**(1R, 2S, 3R)-2-Ethyl-5-methylene-3-nitro-2-phenylcyclopentanecarbonitrile (18):**

The reaction was performed with 13.0 mg (0.076 mmol) of nitroalkene according to general procedure C and purified by flash chromatography (10% ethyl acetate in hexanes) to give the product as an oil (18.4 mg, 94% yield, >20:1 dr):  $^1\text{H}$  NMR (500 MHz,  $\text{CDCl}_3$ ):  $\delta$  7.49–7.46 (m, 2 H), 7.43–7.39 (m, 2 H), 7.35–7.32 (m, 1 H), 5.61 (q,  $J = 2.2$  Hz, 1 H), 5.32 (q,  $J = 2.2$  Hz, 1 H), 5.04 (d,  $J = 6.8$  Hz, 1 H), 4.23 (s, 1 H), 3.00 (dt,  $J = 19.0, 1.0$  Hz, 1 H), 2.83 (ddq,  $J = 19.0, 7.0, 2.5$  Hz, 1 H), 2.35 (dq,  $J = 14.7, 7.4$  Hz, 1 H), 1.76 (dq,  $J = 14.5, 7.3$  Hz, 1 H), 0.94 (t,  $J = 7.5$  Hz, 3 H);  $^{13}\text{C}$  NMR (125 MHz,  $\text{CDCl}_3$ ):  $\delta$  142.1, 136.8, 129.2, 128.2, 127.1, 118.6, 111.2, 94.9, 57.5, 42.9, 34.8, 29.1, 9.1; IR (neat): 2979, 2243, 1551, 1365  $\text{cm}^{-1}$ .  $[\alpha]_{23}^{\text{D}} = -4.49$  (c 1.0,  $\text{CHCl}_3$ ). Chiral HPLC: 98% ee, Chiralpak AD-H, 0.8 mL/min, 1% *i*-PrOH in heptane,  $\lambda = 220$  nm,  $t_{\text{R, minor}} = 16.9$  min,  $t_{\text{R, major}} = 21.1$  min.

major = 31.6 min. Mass: Anal calcd for C<sub>15</sub>H<sub>16</sub>N<sub>2</sub>O<sub>2</sub>: C, 70.29; H, 6.29; N, 10.93; found: C, 70.11; H, 6.35; N, 11.02. R<sub>f</sub> 0.50 (20% ethyl acetate in hexanes).

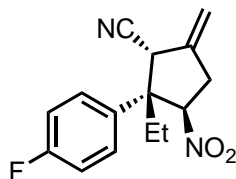

**(1R, 2S, 3R)-2-Ethyl-2-(4-fluorophenyl)-5-methylene-3-nitrocyclopentanecarbonitrile (19):** The reaction was performed with 15.0 mg (0.078 mmol) of nitroalkene according to general procedure C and purified by flash chromatography (10% ethyl acetate in hexanes) to give the product as a light yellow oil (21.0 mg, >99% yield, >20:1 dr): <sup>1</sup>H NMR (500 MHz, CDCl<sub>3</sub>): δ 7.47-7.43 (m, 2 H), 7.13-7.09 (m, 2 H), 5.61 (d, *J* = 2.5 Hz, 1 H), 5.34 (d, *J* = 2.5 Hz, 1 H), 4.99 (d, *J* = 6.7 Hz, 1 H), 4.22 (s, 1 H), 3.02 (d, *J* = 19.0 Hz, 1 H), 2.82 (ddq, *J* = 19.0, 7.0, 2.4 Hz, 1 H), 2.30 (dq, *J* = 14.7, 7.4 Hz, 1 H), 1.77 (dq, *J* = 14.6, 7.3 Hz, 1 H), 0.93 (t, *J* = 7.5 Hz, 3 H); <sup>13</sup>C NMR (125 MHz, CDCl<sub>3</sub>): δ 161.1, 141.8, 132.6, 129.1, 129.0, 118.4, 116.3, 116.1, 111.6, 94.7, 57.0, 43.1, 34.7, 29.1, 9.1; IR (neat): 2980, 2244, 1552, 1514 cm<sup>-1</sup>. [α]<sub>23</sub><sup>D</sup> = -6.42 (c 1.0, CHCl<sub>3</sub>). Chiral HPLC: 98% ee, Chiralpak AD-H, 0.8 mL/min, 1% *i*-PrOH in heptane, λ = 254 nm, t<sub>R, minor</sub> = 24.6 min, t<sub>R, major</sub> = 31.4 min. HRMS: calcd for amine (M + H) C<sub>15</sub>H<sub>18</sub>FN<sub>2</sub> 245.1454; found 245.1455. R<sub>f</sub> 0.23 (10% ethyl acetate in hexanes).

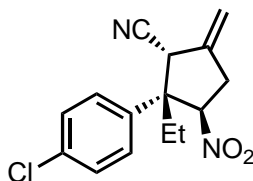

**(1R, 2S, 3R)-2-(4-Chlorophenyl)-2-ethyl-5-methylene-3-nitrocyclopentanecarbonitrile (20):** The reaction was performed with 16.0 mg (0.076 mmol) of nitroalkene according to general procedure C and purified by flash chromatography (10% ethyl acetate in hexanes) to give the product as an oil (21.6 mg, 98% yield, >20:1 dr): <sup>1</sup>H NMR (500 MHz, CDCl<sub>3</sub>): δ 7.42-7.32 (m, 4 H), 5.62 (d, *J* = 2.2 Hz, 1 H), 5.35 (d, *J* = 2.2 Hz, 1 H), 5.02 (d, *J* = 6.8 Hz, 1 H), 4.23 (s, 1 H), 3.03 (d, *J* =

19.1 Hz, 1 H), 2.83 (ddq,  $J = 19.1, 7.1, 2.4$  Hz, 1 H), 2.30 (dq,  $J = 14.8, 7.4$  Hz, 1 H), 1.77 (dq,  $J = 14.6, 7.3$  Hz, 1 H), 0.95 (t,  $J = 7.5$  Hz, 3 H);  $^{13}\text{C}$  NMR (125 MHz,  $\text{CDCl}_3$ ):  $\delta$  141.5, 139.0, 135.3, 130.4, 128.6, 127.3, 125.5, 118.2, 111.7, 94.4, 57.2, 42.9, 34.7, 29.0, 9.1; IR (neat): 2979, 2244, 1553  $\text{cm}^{-1}$ .  $[\alpha]_{23}^{\text{D}} = 1.19$  (c 1.0,  $\text{CHCl}_3$ ). Chiral HPLC: 98% ee, Chiralpak AD-H, 0.8 mL/min, 1% *i*-PrOH in heptane,  $\lambda = 254$  nm,  $t_{\text{R, minor}} = 19.5$  min,  $t_{\text{R, major}} = 25.4$  min. HRMS: calcd for amine ( $\text{M} + \text{H}$ )  $\text{C}_{15}\text{H}_{18}\text{ClN}_2$  261.1159; found 261.1154.  $R_f$  0.19 (10% ethyl acetate in hexanes).

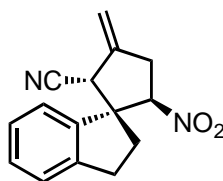

**(1R,2S,5S)-3-Methylene-5-nitro-2',3'-dihydrospiro[cyclopentane-1,1'-indene]-2-**

**carbonitrile (21):** The reaction was performed with 13.3 mg (0.076 mmol) of nitroalkene according to general procedure C and purified by flash chromatography (15% ethyl acetate in hexanes) to give the product as a white solid (19.1 mg, 99% yield, 92% ee), mp 122-124  $^{\circ}\text{C}$ .  $^1\text{H}$  NMR (400 MHz,  $\text{CDCl}_3$ ):  $\delta$  7.33-7.28 (m, 2H), 7.24-7.19 (m, 1H), 7.12 (d,  $J = 7.5$  Hz, 1H), 5.60 (q,  $J = 2.5$  Hz, 1H), 5.46-5.44 (m, 1H), 4.94 (t,  $J = 4.6$  Hz, 1H), 4.32-4.29 (m, 1H), 3.20 (dq,  $J = 2.2, 2.2, 2.2, 4.6$  Hz, 2H), 3.09-3.04 (m, 2H), 2.30 (dt,  $J = 8.3, 8.3, 13.5$  Hz, 1H), 2.14 (ddd,  $J = 5.2, 6.8, 13.5$  Hz, 1H).  $^{13}\text{C}$  NMR (100 MHz,  $\text{CDCl}_3$ ):  $\delta$  143.9, 141.6, 141.5, 129.6, 127.6, 125.9, 123.5, 117.7, 113.2, 92.1, 62.2, 44.1, 35.8, 34.2, 30.6. IR (thin film): 2926, 2854, 2245, 1665, 1550, 1476, 1458, 1366, 1300  $\text{cm}^{-1}$ .  $[\alpha]_{23}^{\text{D}} = -21.4$  (c 0.88,  $\text{CHCl}_3$ ). Chiral HPLC: Chiralpak AD-H, 0.8 mL/min, 1% *i*-PrOH in heptane,  $\lambda = 220$  nm,  $t_{\text{R, minor}} = 23.6$  min,  $t_{\text{R, major}} = 26.6$  min. HRMS: calcd for the amine ( $\text{M} + \text{Na}^+$ )  $\text{C}_{15}\text{H}_{16}\text{N}_2\text{Na}$  247.1211; found 247.1221.  $R_f$  0.23 (15% ethyl acetate in hexanes).

## F. Cycloadduct Derivatives

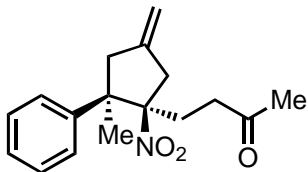

**4-((1R,2R)-2-Methyl-4-methylene-1-nitro-2-phenylcyclopentyl)butan-2-one (4):** To a solution of nitrocyclopentane **3a** and **3b** (18.5 mg as a 3:1 mixture, 0.085 mmol) in acetonitrile (1.5 mL) was added DBU (14  $\mu$ L, 0.094 mmol) and 3-buten-2-one (7.6  $\mu$ L, 0.094 mmol). The pale yellow solution was stirred at room temperature for 45 minutes before a second charge of 3-buten-2-one (2  $\mu$ L, 0.025 mmol) was added. After another 45 minutes, the reaction was concentrated and filtered through a plug of silica gel (15% ethyl acetate in hexanes) to give the product as a clear, colorless oil (21.3 mg, 87% yield, dr 7.5:1, 57% ee). The major diastereomer was purified by flash chromatography (10% ethyl acetate in hexanes) for characterization purposes.  $^1\text{H}$  NMR (400 MHz,  $\text{CDCl}_3$ ):  $\delta$  7.36-7.24 (m, 5H), 5.13 (quintet,  $J = 2.2$  Hz, 1H), 5.07 (quintet,  $J = 2.2$  Hz, 1H), 3.44 (d,  $J = 16.7$  Hz, 1H), 3.37 (d,  $J = 17.8$  Hz, 1H), 2.71-2.64 (m, 1H), 2.60 (dq,  $J = 1.8, 17.8$  Hz, 1H), 2.46 (dq,  $J = 1.8, 16.7$  Hz, 1H), 2.37-2.31 (m, 2H), 2.19-2.11 (m, 1H), 2.14 (s, 3H), 1.57 (s, 3H).  $^{13}\text{C}$  NMR (100 MHz,  $\text{CDCl}_3$ ):  $\delta$  206.9, 144.9, 141.4, 128.7, 127.9, 126.8, 109.1, 102.8, 53.3, 44.8, 40.0, 39.2, 30.4, 27.2, 24.3. IR (thin film): 3061, 2930, 1717, 1663, 1537, 1499, 1436, 1354  $\text{cm}^{-1}$ .  $[\alpha]_{24}^D = -26.86$  (c 1.44,  $\text{CHCl}_3$ ). Chiral HPLC: Chiralpak IC, 0.8 mL/min, 10% *i*-PrOH in heptane,  $\lambda = 220$  nm,  $t_{R, \text{minor}} = 12.7$  min,  $t_{R, \text{major}} = 29.5$  min.  $R_f$  0.50 (30% ethyl acetate in hexanes).

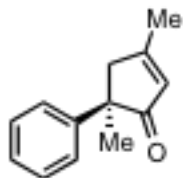

**(R)-3-methyl-5-(naphthalen-2-yl)cyclopent-2-enone (27):** To a solution of nitrocyclopentane **3a** (20.3 mg, 0.09 mmol) in THF (1.0 mL) at  $-78$   $^{\circ}\text{C}$  was added KO $t$ -Bu (102  $\mu$ L, 1 M in THF, 0.10 mmol) and the yellow solution was stirred for 20 minutes at  $-78$   $^{\circ}\text{C}$ . The dry ice-acetone bath was then removed, dimethyldioxirane (1.1 mL, approx. 1 M in acetone, 0.11 mmol) was added, and the mixture was immediately placed in a bath at approximately  $-20$   $^{\circ}\text{C}$ . The mixture was stirred for 10 minutes and then added

to a well-stirred solution of 0.25 M, pH 7.0 phosphate buffer (5 mL) and extracted with diethyl ether (3 x 3 mL). The combined organic layers were washed with brine, dried over MgSO<sub>4</sub>, concentrated and purified by flash chromatography (15% ethyl acetate in hexanes) to yield the product as a clear, colorless oil (11.3 mg, 65% yield). <sup>1</sup>H NMR (400 MHz, CDCl<sub>3</sub>): δ 7.33-7.18 (m, 5H), 6.00 (s, 1H), 2.98 (d, *J* = 19.2 Hz, 1H), 2.75 (d, *J* = 19.2 Hz, 1H), 2.18 (s, 3H), 1.53 (s, 3H). <sup>13</sup>C NMR (100 MHz, CDCl<sub>3</sub>): δ 212.1, 176.8, 144.3, 129.0, 128.9, 126.8, 126.2, 52.5, 52.2, 24.6, 19.7. IR (thin film): 3059, 2964, 2924, 1700, 1625, 1496, 1432 cm<sup>-1</sup>. [α]<sub>24</sub><sup>D</sup> = -7.4 (c 0.96, CHCl<sub>3</sub>). Chiral HPLC: Chiralpak AD-H, 0.8 mL/min, 2% *i*-PrOH in heptane, λ = 220 nm, t<sub>R</sub>, major = 15.6 min, t<sub>R</sub>, minor = 17.1 min. HRMS: calcd for (M+H<sup>+</sup>) C<sub>13</sub>H<sub>15</sub>O 187.1123; found 187.1114. R<sub>f</sub> 0.42 (30% ethyl acetate in hexanes).

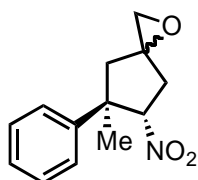

**(5R,6S)-5-Methyl-6-nitro-5-phenyl-1-oxaspiro[2.4]heptane (28):** To a solution of nitrocyclopentane **3a** (15.3 mg, 0.071 mmol) in chloroform (0.5 mL) was added *m*-chloroperoxybenzoic acid (18.2 mg, 0.11 mmol). The solution was stirred for 15 hours at room temperature, during which a white solid precipitated. The suspension was diluted with diethyl ether (3 mL), and washed with sat. NaHSO<sub>3</sub> (2 mL), sat. NaHCO<sub>3</sub> (2 x 2 mL), H<sub>2</sub>O (2 mL) and brine (2 mL). The organic layer was dried over MgSO<sub>4</sub>, concentrated and filtered through a plug of SiO<sub>2</sub> (30% ethyl acetate in hexanes) to yield the product as a clear, colorless oil (15.9 mg, 97% yield, 2.5:1 dr, as determined by <sup>1</sup>H NMR). <sup>1</sup>H NMR (400 MHz, CDCl<sub>3</sub>): δ 7.58-7.55 (m, 1.4H), 7.45-7.37 (m, 2.6H), 7.32-7.28 (m, 1H), 5.21-5.16 (m, 1H), 3.06 (d, *J* = 4.7 Hz, 0.7H), 3.04 (d, *J* = 4.7 Hz, 0.7H), 2.98 (d, *J* = 4.7 Hz, 0.3H), 2.88 (d, *J* = 4.7 Hz, 0.3H), 2.62-2.41 (m, 3H), 2.32 (d, *J* = 14.7 Hz, 0.3H), 2.17 (dd, *J* = 6.9, 16.0 Hz, 0.7H), 1.53 (s, 0.9H), 1.46 (s, 2.1H).

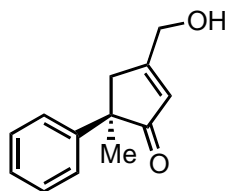

**(R)-3-(Hydroxymethyl)-5-methyl-5-phenylcyclopent-2-enone (29):** To a solution of epoxide **28** (16.1 mg, 0.07 mmol) in THF (1 mL) at  $-78\text{ }^{\circ}\text{C}$  was added KO $t$ -Bu (100  $\mu\text{L}$ , 1 M in THF, 0.1 mmol) and the yellow solution was stirred for 20 minutes at  $-78\text{ }^{\circ}\text{C}$ . Dimethyldioxirane (1.5 mL, approx. 0.1 M in acetone, 0.15 mmol) was added and the suspension was warmed to  $0\text{ }^{\circ}\text{C}$ . After 15 minutes, the reaction was warmed to room temperature and stirred another 15 minutes, then added to a solution of 0.25 M, pH 7.0 phosphate buffer (5 mL) and extracted with diethyl ether (3 x 5 mL). The combined organic layers were washed with brine, dried over  $\text{MgSO}_4$ , concentrated and purified by flash chromatography (2% methanol in dichloromethane) to yield the product as a clear, colorless oil (10.2 mg, 73% yield).  $^1\text{H}$  NMR (400 MHz,  $\text{CDCl}_3$ ):  $\delta$  7.32-7.19 (m, 5H), 6.24 (quintet,  $J = 1.7\text{ Hz}$ , 1H), 4.49 (s, 2H), 2.97 (d,  $J = 18.5\text{ Hz}$ , 1H), 2.74 (d,  $J = 18.5\text{ Hz}$ , 1H), 2.57 (bs, 1H), 1.54 (s, 3H).  $^{13}\text{C}$  NMR (100 MHz,  $\text{CDCl}_3$ ):  $\delta$  211.6, 179.3, 143.9, 128.9, 127.0, 126.4, 126.2, 63.1, 51.9, 47.1, 24.6. IR (thin film): 3416, 3060, 2926, 1695, 1622, 1496, 1445  $\text{cm}^{-1}$ .  $[\alpha]_{23}^{\text{D}} = -3.4$  (c 0.97,  $\text{CHCl}_3$ ). Chiral HPLC: Chiralpak AD-H, 0.8 mL/min, 10%  $i$ -PrOH in heptane,  $\lambda = 220\text{ nm}$ ,  $t_{\text{R, major}} = 8.1\text{ min}$ ,  $t_{\text{R, minor}} = 8.8\text{ min}$ . HRMS: calcd for  $(\text{M}+\text{Na}^+)$   $\text{C}_{13}\text{H}_{14}\text{O}_2\text{Na}$  225.0891; found 225.0897.  $R_f$  0.27 (10% methanol in dichloromethane).

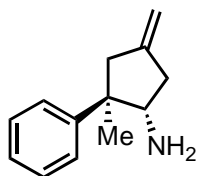

**(1S,2R)-2-Methyl-4-methylene-2-phenylcyclopentanamine (30):** A suspension of nitrocyclopentane **3a** (13.6 mg, 0.063 mmol) in concentrated HCl (126  $\mu\text{L}$ , 1.52 mmol) and methanol (0.65 mL) was placed in an ambient water bath. Zinc dust (167.4 mg, 1.30 mmol) was carefully added with vigorous stirring over 1 minute, and the mixture was stirred for 10 minutes. The reaction was then quenched with sat.  $\text{NaHCO}_3$  (10 mL) and extracted with ethyl acetate (3 x 5 mL). The combined extracts were dried over  $\text{MgSO}_4$ ,

concentrated and purified by flash chromatography (dichloromethane to 10% methanol in dichloromethane) to afford the product as a clear, colorless oil (6.6 mg, 56% yield).  $^1\text{H}$  NMR (400 MHz,  $\text{CDCl}_3$ ):  $\delta$  7.43-7.19 (m, 5H), 4.95 (s, 1H), 4.92 (s, 1H), 3.53 (t,  $J = 8.9$  Hz, 1H), 2.85-2.73 (m, 2H), 2.50 (dd,  $J = 1.5, 16.0$  Hz, 1H), 2.26-2.17 (m, 1H), 1.69 (br s, 2H), 1.27 (s, 3H).

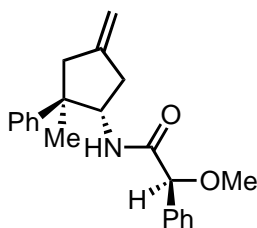

**(S)-2-Methoxy-N-((1S,2R)-2-methyl-4-methylene-2-phenylcyclopentyl)-2-phenylacetamide (31):** To a solution of aminocyclopentane **30** (3.4 mg, 0.018 mmol) in dichloromethane (300  $\mu\text{L}$ ) was added (*S*)-*O*-methylmandelic acid (3.3 mg, 0.020 mmol) followed by *N,N'*-dicyclohexylcarbodiimide (4.5 mg, 0.022 mmol). The mixture was stirred under nitrogen for 1 hour, filtered, washed with dichloromethane and concentrated. Purified by flash chromatography (15% ethyl acetate in hexanes) to yield the product as a clear, colorless oil (5.0 mg, 83% yield).  $^1\text{H}$  NMR (400 MHz,  $\text{CDCl}_3$ ):  $\delta$  7.43-7.21 (m, 9H observed), 6.90 (d,  $J = 8.9$  Hz, 1H), 4.99 (s, 1H), 4.91 (s, 1H), 4.75 (q,  $J = 8.1$  Hz, 1H), 4.61 (s, 1H), 3.33 (s, 3H), 2.83 (dd,  $J = 7.9$  Hz, 1H), 2.79 (d,  $J = 17.4$  Hz, 1H), 2.56 (d,  $J = 7.4$  Hz, 1H), 2.20 (dd,  $J = 7.9$  Hz, 1H), 1.38 (s, 3H).  $R_f$  0.41 (30% ethyl acetate in hexanes).

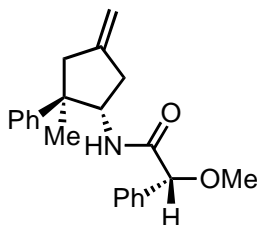

**(S)-2-Methoxy-N-((1S,2R)-2-methyl-4-methylene-2-phenylcyclopentyl)-2-phenylacetamide (32):** To a solution of aminocyclopentane **30** (3.2 mg, 0.017 mmol) in dichloromethane (300  $\mu\text{L}$ ) was added (*R*)-*O*-methylmandelic acid (3.1 mg, 0.019 mmol) followed by *N,N'*-dicyclohexylcarbodiimide (4.3 mg, 0.021 mmol). The mixture was

stirred under nitrogen for 1 hour, filtered, washed with dichloromethane and concentrated. Purified by flash chromatography (15 to 20% ethyl acetate in hexanes) to yield the product as a clear, colorless oil (4.7 mg, 78% yield).  $^1\text{H}$  NMR (400 MHz,  $\text{CDCl}_3$ ):  $\delta$  7.33-7.12 (m, 8H observed), 6.90 (bd,  $J = 8.8$  Hz, 1H), 5.02 (s, 1H), 4.95 (s, 1H), 4.69 (q,  $J = 8.7$  Hz, 1H), 4.61 (s, 1H), 3.35 (s, 3H), 2.90 (dd,  $J = 8.3, 16.7$  Hz, 1H), 2.80 (d,  $J = 16.7$  Hz, 1H), 2.55 (dq,  $J = 1.6, 16.1$  Hz, 1H), 2.30 (ddq,  $J = 2.3, 7.7, 17.1$  Hz, 1H), 1.29 (s, 3H).  $R_f$  0.33 (30% ethyl acetate in hexanes).

## F. Spectra

Std proton

Archive directory:

Sample directory:

File: dab-xv-42B

Pulse Sequence: s2pul

Solvent: cdcl3

Temp. 20.0 C / 293.1 K

Relax. delay 0.500 sec

Pulse 45.0 degrees

Acq. time 4.000 sec

Width 5605.4 Hz

12 repetitions

OBSERVE H1, 399.7345542 MHz

DATA PROCESSING

FT size 65536

Total time 1 min

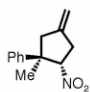

**3a**

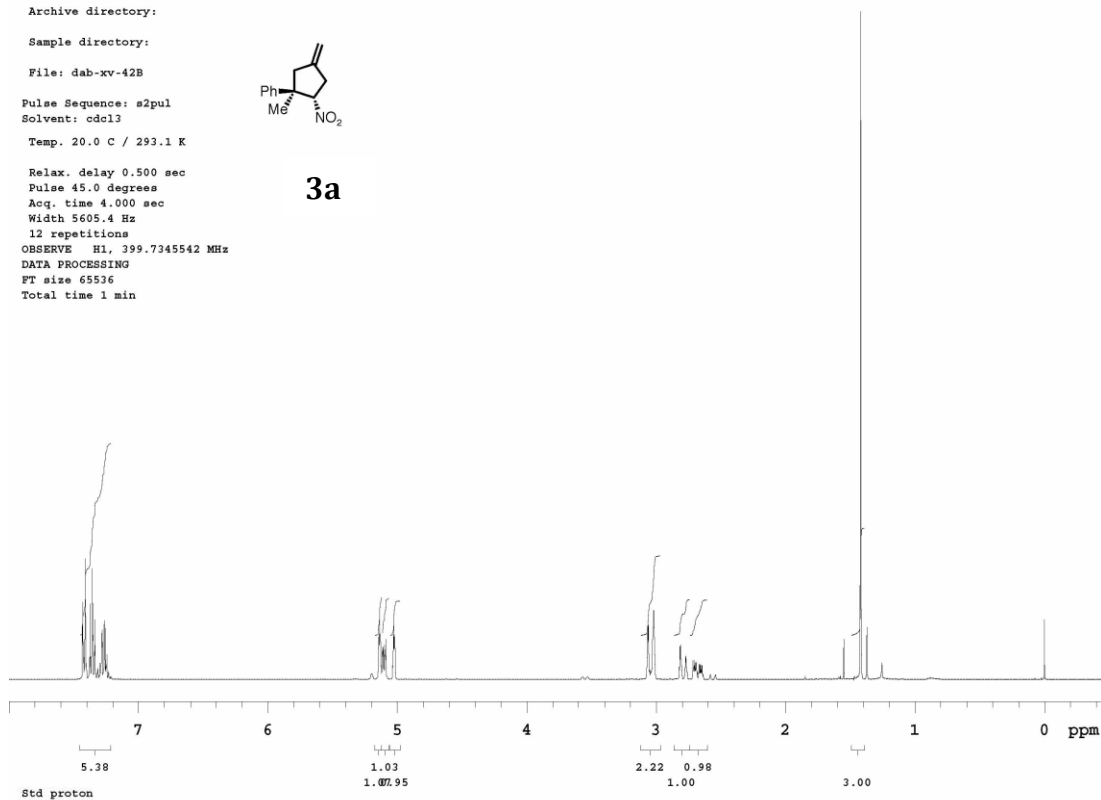

Archive directory:

Sample directory:

File: dab-xiv-73AC13

Pulse Sequence: s2pul

Solvent: cdcl3

Temp. 22.0 C / 295.1 K

User: 1-14-87

Relax. delay 1.000 sec

Pulse 39.5 degrees

Acq. time 1.300 sec

Width 24509.8 Hz

44 repetitions

OBSERVE C13, 100.5132997 MHz

DECOUPLE H1, 399.7365548 MHz

Power 43 dB

continuously on

WALTZ-16 modulated

DATA PROCESSING

Line broadening 0.5 Hz

FT size 65536

Total time 19 min

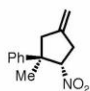

**3a**

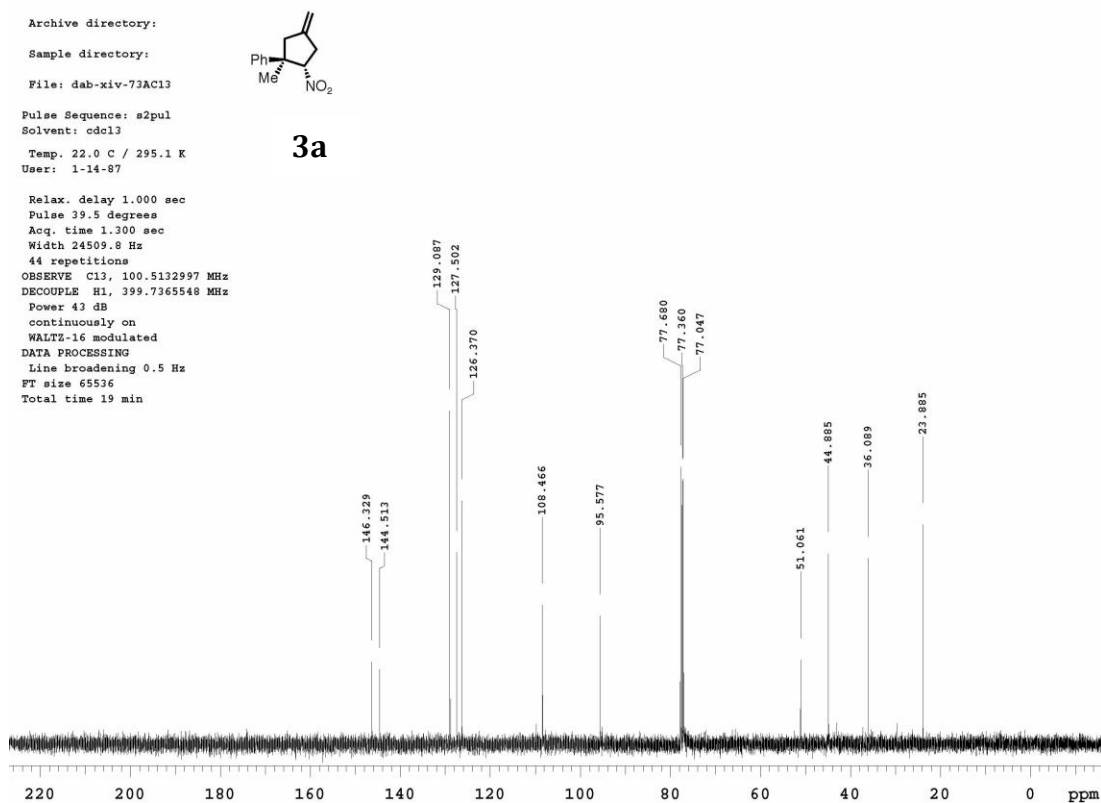

Std proton

Archive directory:

Sample directory:

File: dab-xv-42B

Pulse Sequence: s2pul

Solvent: cdcl3

Temp. 20.0 C / 293.1 K

Relax. delay 0.500 sec

Pulse 45.0 degrees

Acq. time 4.000 sec

Width 5605.4 Hz

12 repetitions

OBSERVE H1, 399.7345510 MHz

DATA PROCESSING

FT size 65536

Total time 1 min

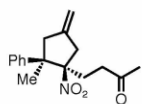

4

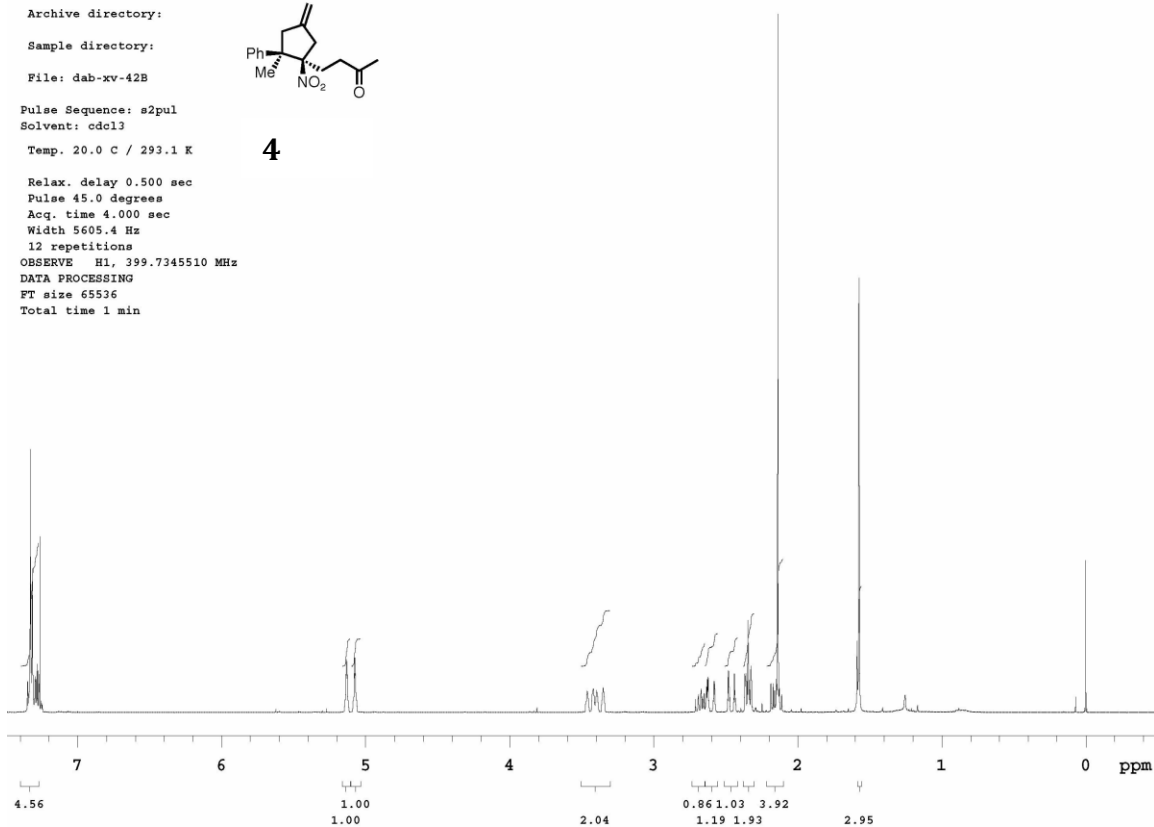

Std proton

Archive directory:

Sample directory:

File: dab-xv-42BC13

Pulse Sequence: s2pul

Solvent: cdcl3

Temp. 20.0 C / 293.1 K

User: 1-14-87

Relax. delay 1.000 sec

Pulse 39.5 degrees

Acq. time 1.300 sec

Width 24509.8 Hz

244 repetitions

OBSERVE C13, 100.5132997 MHz

DECOUPLE H1, 399.7365548 MHz

Power 43 dB

continuously on

WALTZ-16 modulated

DATA PROCESSING

Line broadening 0.5 Hz

FT size 65536

Total time 19 min

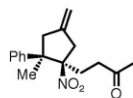

4

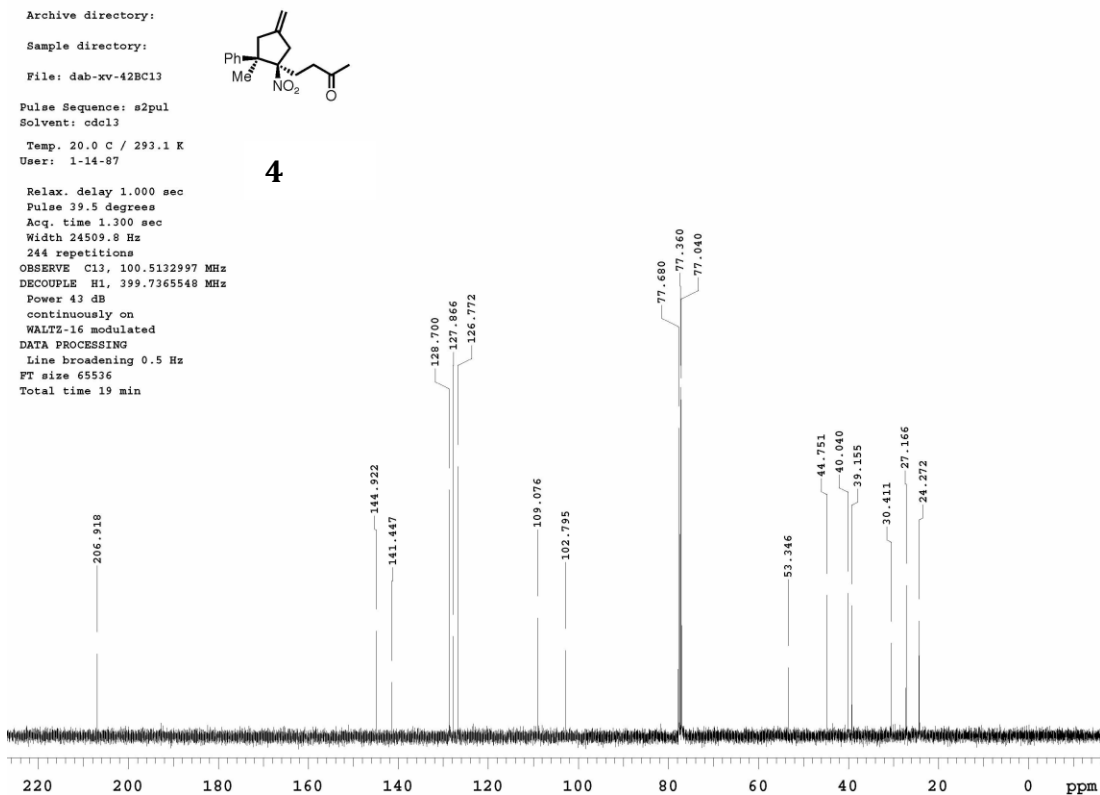

Std proton

Archive directory:

Sample directory:

File: dab-xiv-72A

Pulse Sequence: s2pul

Solvent: cdcl3

Temp. 22.0 C / 295.1 K

Relax. delay 0.500 sec

Pulse 45.0 degrees

Acq. time 4.000 sec

Width 5605.4 Hz

8 repetitions

OBSERVE H1, 399.7345511 MHz

DATA PROCESSING

FT size 65536

Total time 1 min

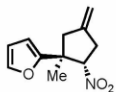

5a

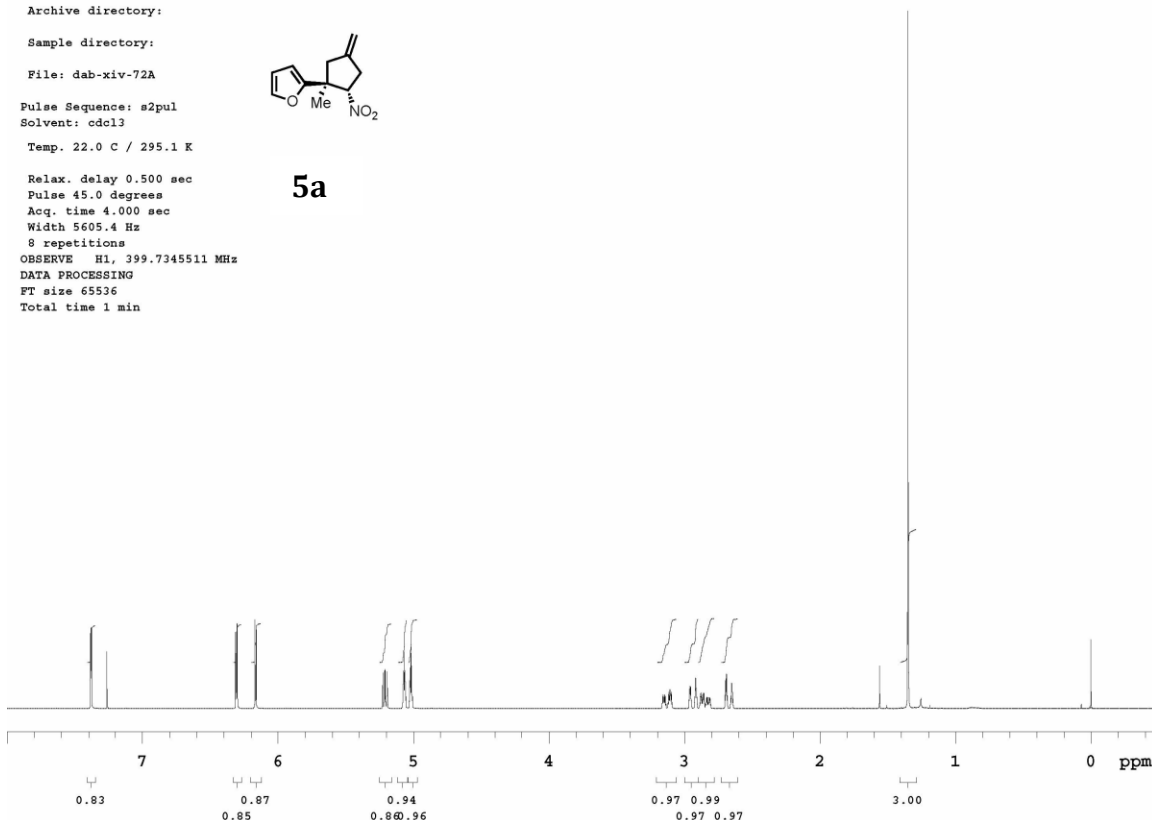

Archive directory:

Sample directory:

File: dab-xiv-72AC13

Pulse Sequence: s2pul

Solvent: cdcl3

Temp. 22.0 C / 295.1 K

User: 1-14-87

Relax. delay 1.000 sec

Pulse 39.5 degrees

Acq. time 1.300 sec

Width 24509.8 Hz

80 repetitions

OBSERVE C13, 100.5132990 MHz

DECOUPLE H1, 399.7365548 MHz

Power 43 dB

continuously on

WALTZ-16 modulated

DATA PROCESSING

Line broadening 0.5 Hz

FT size 65536

Total time 19 min

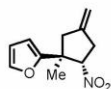

5a

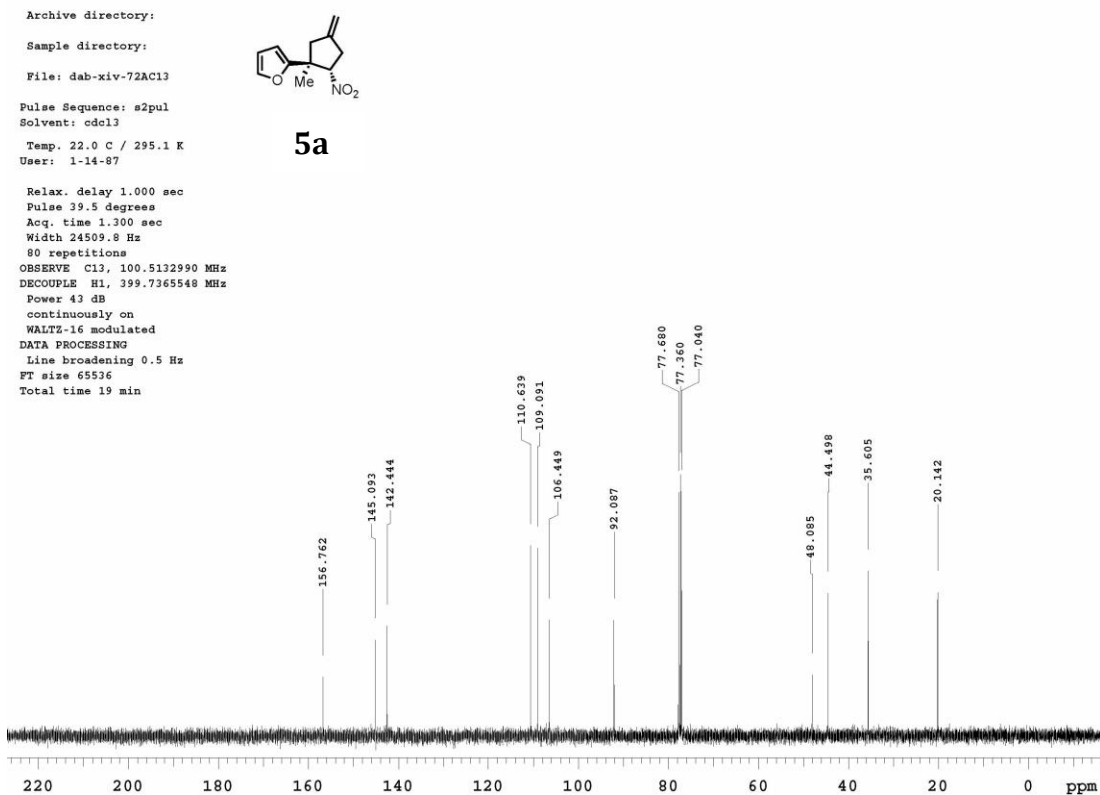

Std proton

Archive directory:

Sample directory:

File: dab-xvi-11A

Pulse Sequence: s2pul

Solvent: cdcl3

Temp. 23.0 C / 296.1 K

Relax. delay 0.500 sec

Pulse 45.0 degrees

Acq. time 4.000 sec

Width 5605.4 Hz

4 repetitions

OBSERVE H1, 399.7345515 MHz

DATA PROCESSING

FT size 65536

Total time 1 min

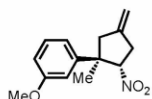

6a

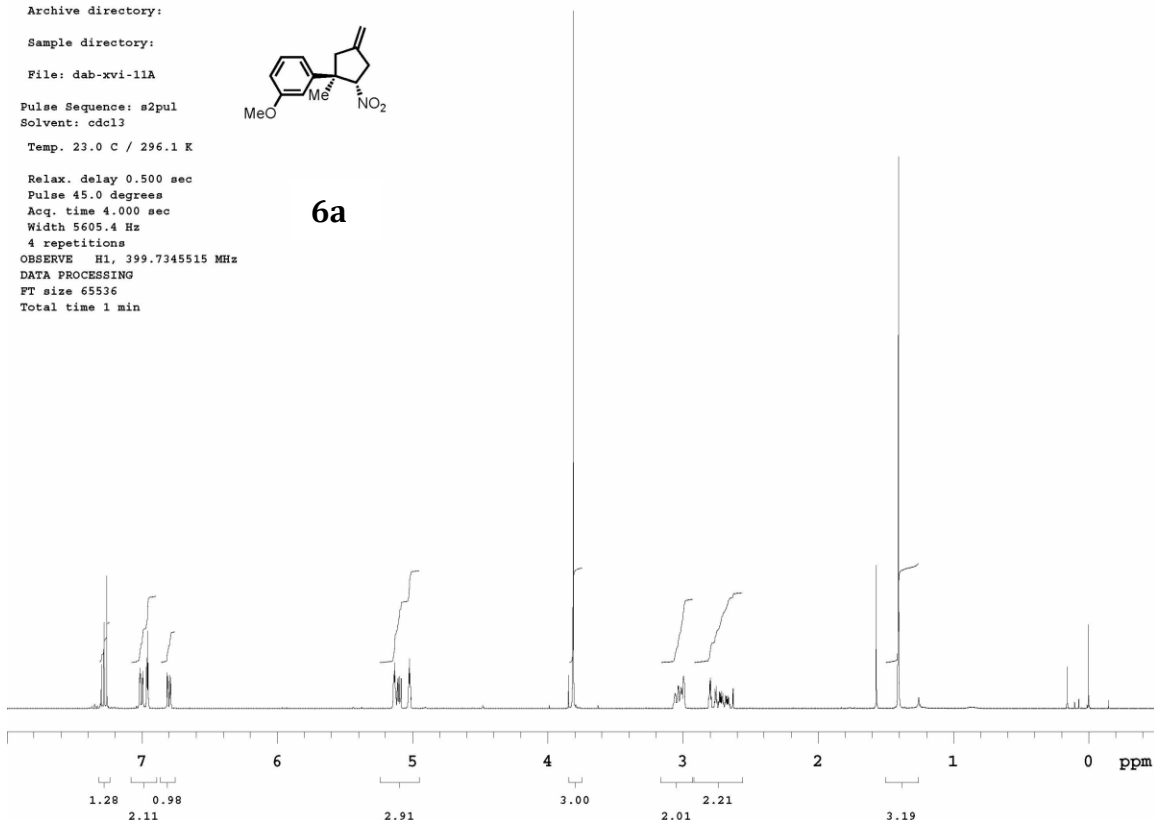

Std proton

Archive directory:

Sample directory:

File: dab-xvi-11AC13

Pulse Sequence: s2pul

Solvent: cdcl3

Temp. 23.0 C / 296.1 K

User: 1-14-87

Relax. delay 1.000 sec

Pulse 39.5 degrees

Acq. time 1.300 sec

Width 24509.8 Hz

132 repetitions

OBSERVE C13, 100.5132982 MHz

DECOUPLE H1, 399.7365548 MHz

Power 43 dB

continuously on

WALTZ-16 modulated

DATA PROCESSING

Line broadening 0.5 Hz

FT size 65536

Total time 19 min

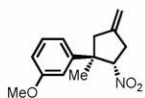

6a

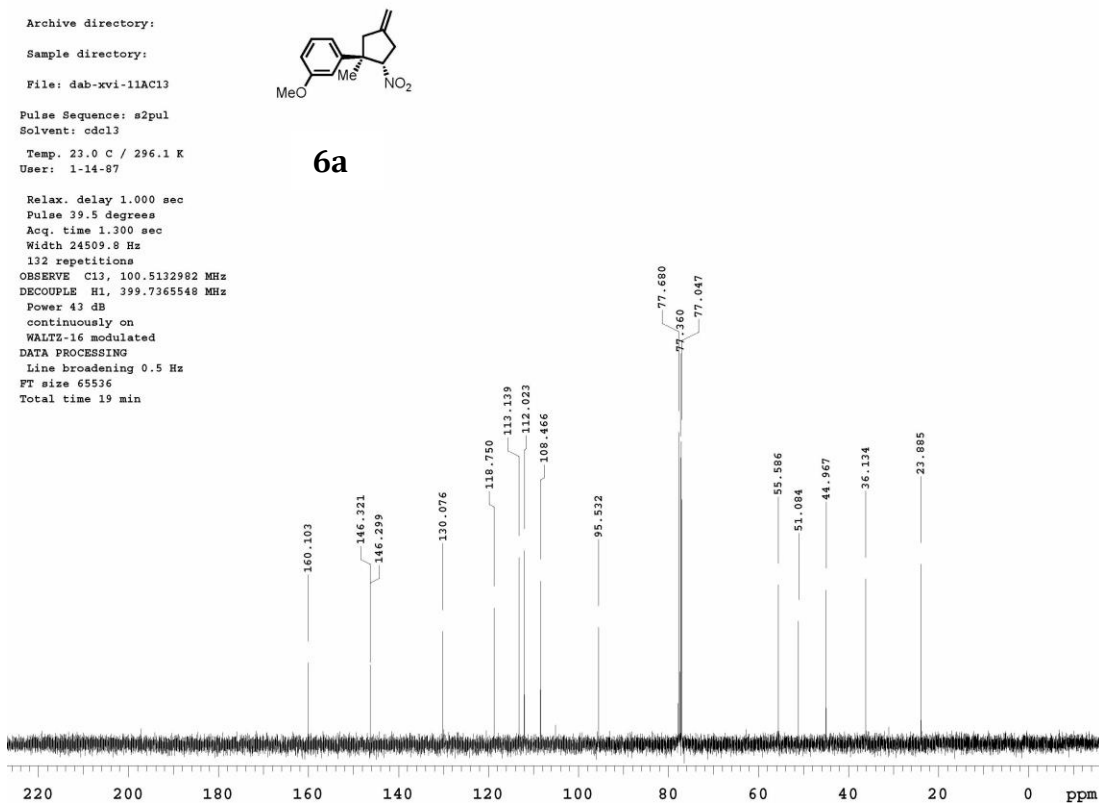

Std proton

Archive directory:

Sample directory:

File: dab-xvi-12A

Pulse Sequence: s2pul

Solvent: cdcl3

Temp. 23.0 C / 296.1 K

Relax. delay 0.500 sec

Pulse 45.0 degrees

Acq. time 4.000 sec

Width 5605.4 Hz

8 repetitions

OBSERVE H1, 399.7345592 MHz

DATA PROCESSING

FT size 65536

Total time 1 min

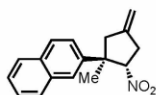

7a

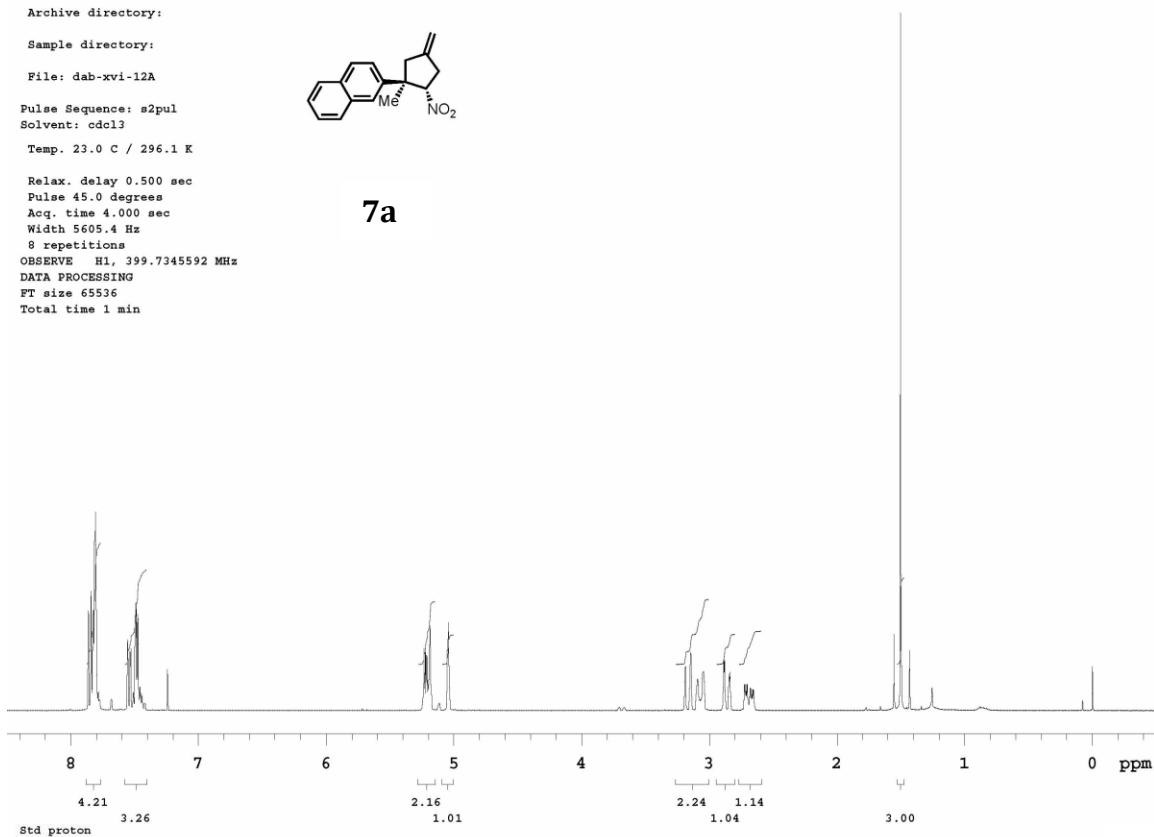

Archive directory:

Sample directory:

File: dab-xvi-12AC13

Pulse Sequence: s2pul

Solvent: cdcl3

Temp. 23.0 C / 296.1 K

User: 1-14-87

Relax. delay 1.000 sec

Pulse 39.5 degrees

Acq. time 1.300 sec

Width 24509.8 Hz

64 repetitions

OBSERVE C13, 100.5133012 MHz

DECOUPLE H1, 399.7365548 MHz

Power 43 dB

Continuously on

WALTZ-16 modulated

DATA PROCESSING

Line broadening 0.5 Hz

FT size 65536

Total time 19 min

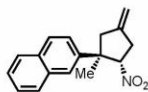

7a

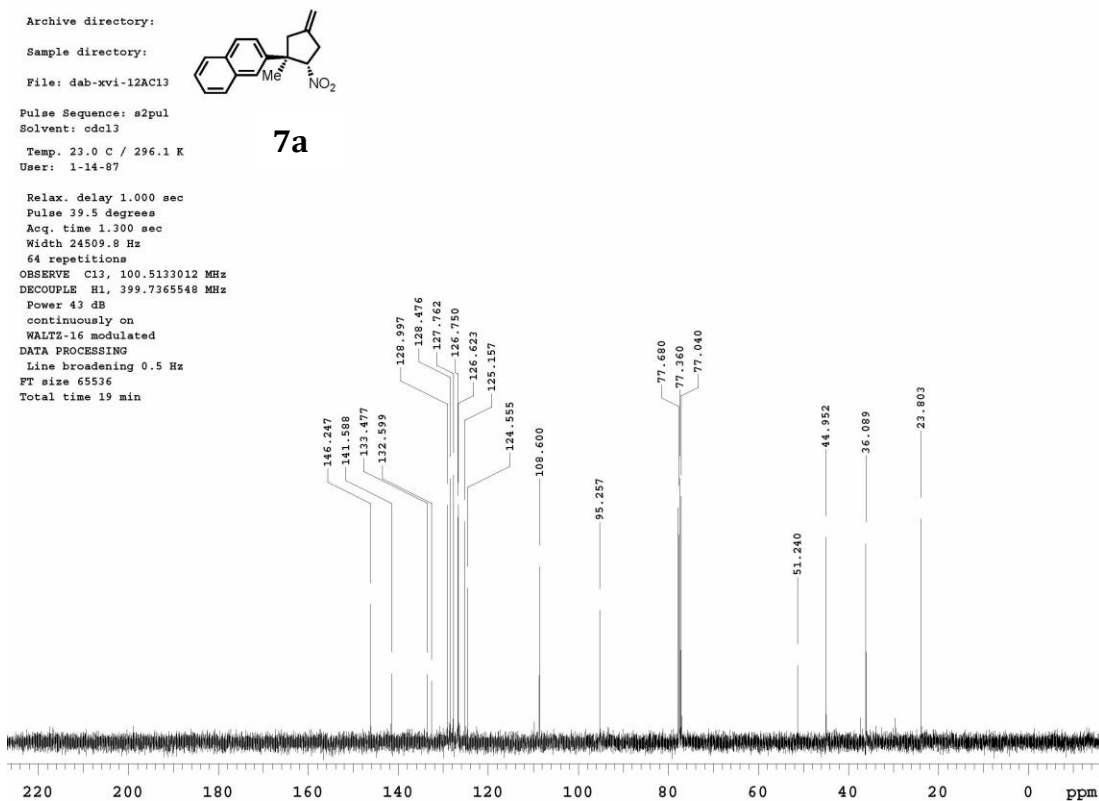

Std proton

Archive directory:

Sample directory:

File: dab-xiv-74A

Pulse Sequence: s2pul

Solvent: cdcl3

Temp. 22.0 C / 295.1 K

Relax. delay 0.500 sec

Pulse 45.0 degrees

Acq. time 4.000 sec

Width 5605.4 Hz

8 repetitions

OBSERVE H1, 399.7345518 MHz

DATA PROCESSING

FT size 65536

Total time 1 min

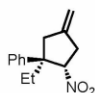

8a

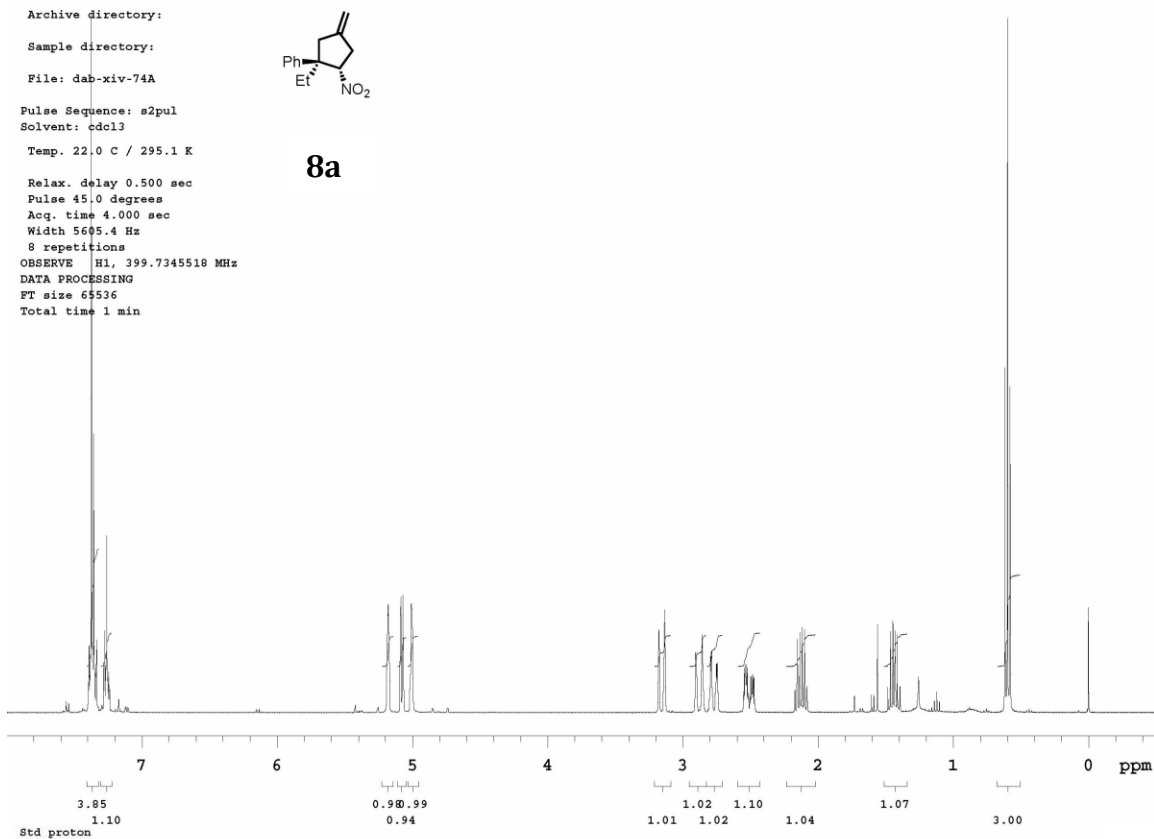

Archive directory:

Sample directory:

File: dab-xiv-74AC13

Pulse Sequence: s2pul

Solvent: cdcl3

Temp. 22.0 C / 295.1 K

User: 1-14-87

Relax. delay 1.000 sec

Pulse 39.5 degrees

Acq. time 1.300 sec

Width 24509.8 Hz

52 repetitions

OBSERVE C13, 100.5132990 MHz

DECOUPLE H1, 399.7365548 MHz

Power 43 dB

continuously on

WALTZ-16 modulated

DATA PROCESSING

Line broadening 0.5 Hz

FT size 65536

Total time 19 min

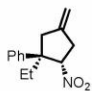

8a

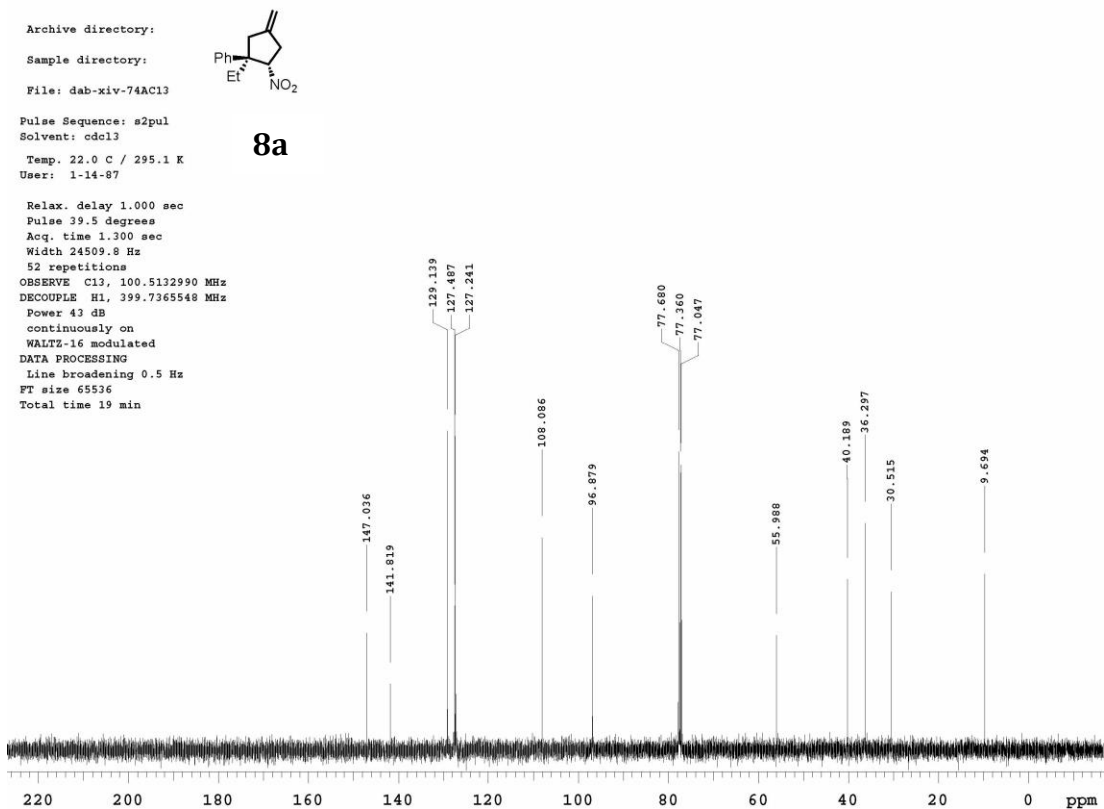

Std proton

Archive directory:

Sample directory:

File: dab-xv-01A

Pulse Sequence: s2pul

Solvent: cdcl3

Temp. 22.0 C / 295.1 K

Relax. delay 0.500 sec

Pulse 45.0 degrees

Acq. time 4.000 sec

Width 5605.4 Hz

4 repetitions

OBSERVE H1, 399.7345505 MHz

DATA PROCESSING

FT size 65536

Total time 1 min

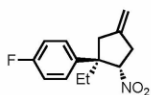

9a

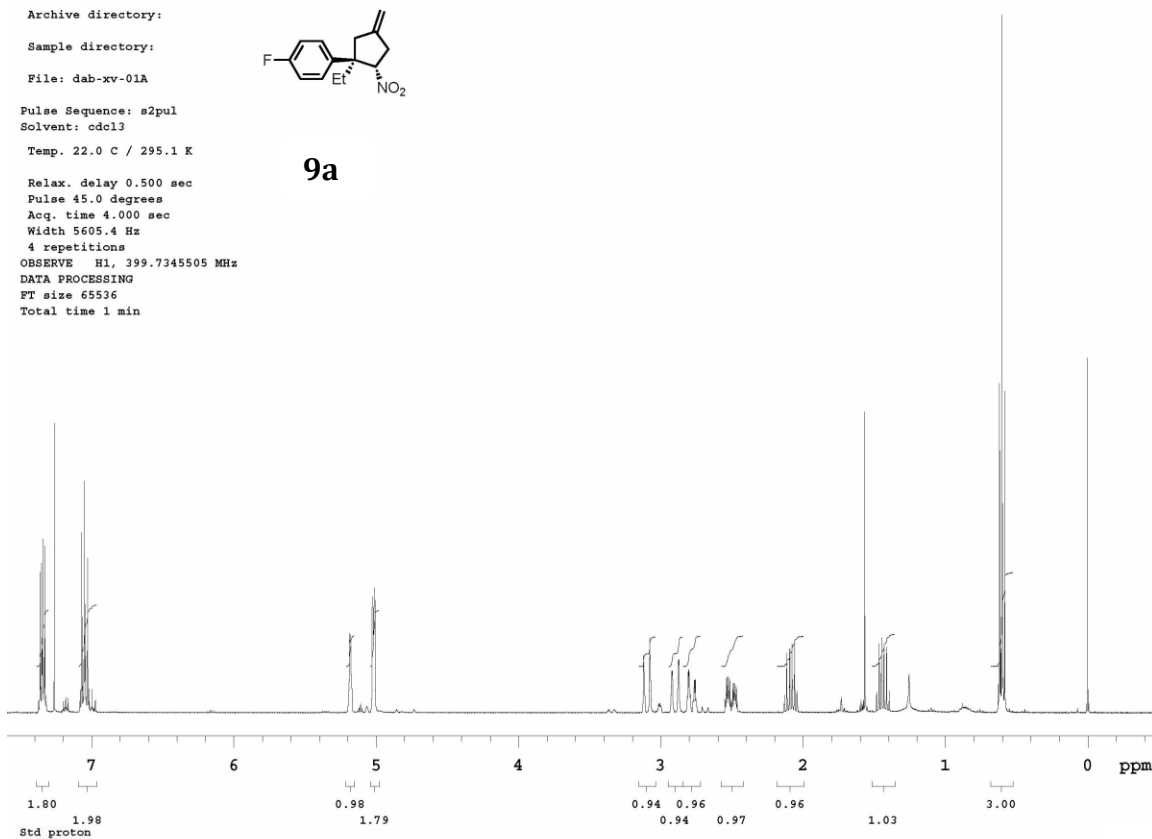

Archive directory:

Sample directory:

File: dab-xv-01AC13

Pulse Sequence: s2pul

Solvent: cdcl3

Temp. 22.0 C / 295.1 K

User: 1-14-87

Relax. delay 1.000 sec

Pulse 39.5 degrees

Acq. time 1.300 sec

Width 24509.8 Hz

228 repetitions

OBSERVE C13, 100.5132990 MHz

DECOUPLE H1, 399.7365548 MHz

Power 43 dB

continuously on

WALTZ-16 modulated

DATA PROCESSING

Line broadening 0.5 Hz

FT size 65536

Total time 19 min

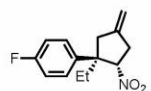

9a

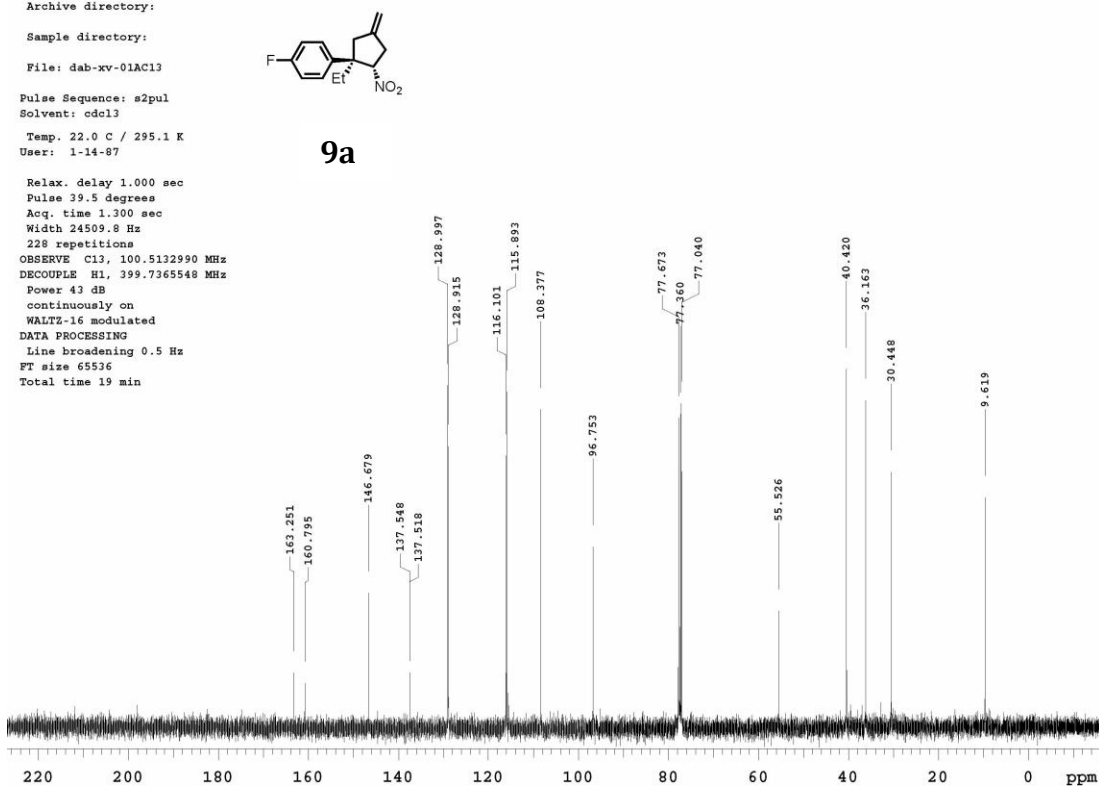

Std proton

Archive directory:

Sample directory:

File: dab-xiv-88A

Pulse Sequence: s2pul

Solvent: cdcl3

Temp. 22.0 C / 295.1 K

Relax. delay 0.500 sec

Pulse 45.0 degrees

Acq. time 4.000 sec

Width 5605.4 Hz

8 repetitions

OBSERVE H1, 399.7345505 MHz

DATA PROCESSING

FT size 65536

Total time 1 min

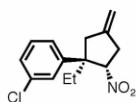

**10a**

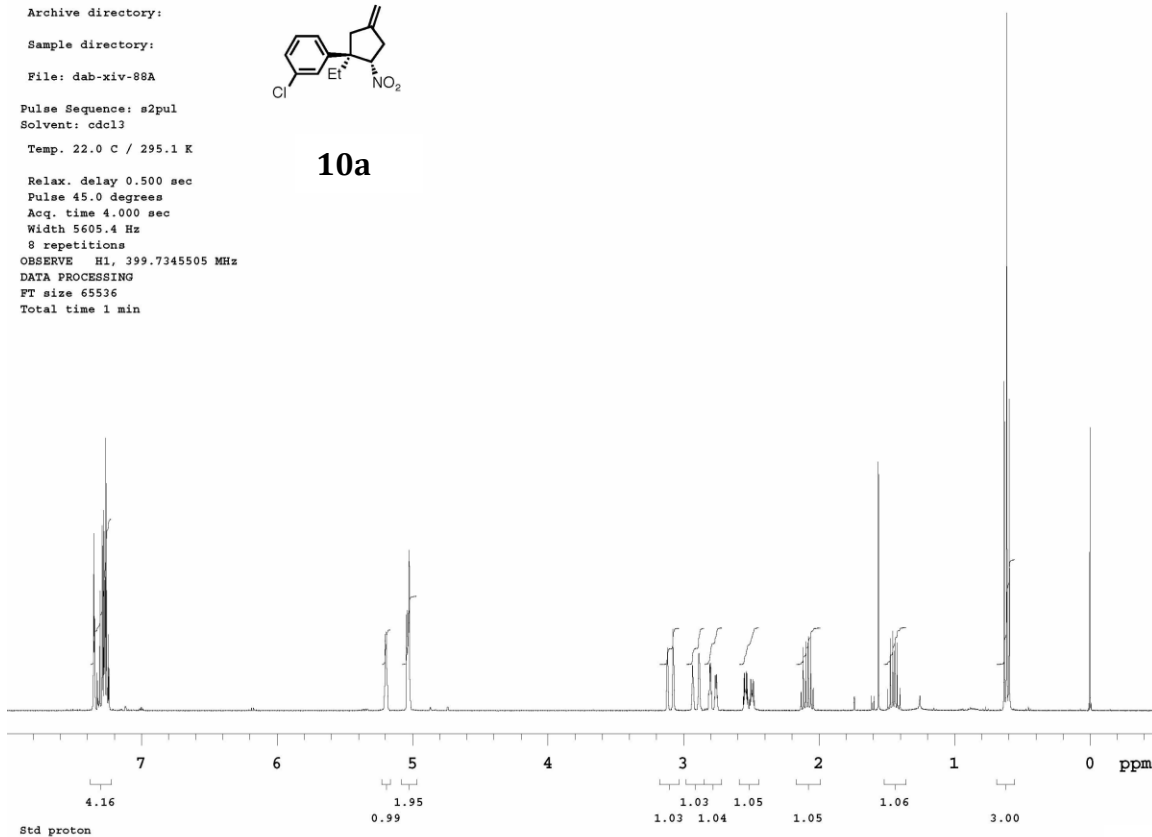

Archive directory:

Sample directory:

File: dab-xiv-88AC13

Pulse Sequence: s2pul

Solvent: cdcl3

Temp. 22.0 C / 295.1 K

User: 1-14-87

Relax. delay 1.000 sec

Pulse 39.5 degrees

Acq. time 1.300 sec

Width 24509.8 Hz

164 repetitions

OBSERVE C13, 100.5132982 MHz

DECOUPLE H1, 399.7365548 MHz

Power 43 dB

continuously on

WALTZ-16 modulated

DATA PROCESSING

Line broadening 0.5 Hz

FT size 65536

Total time 19 min

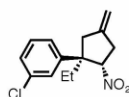

**10a**

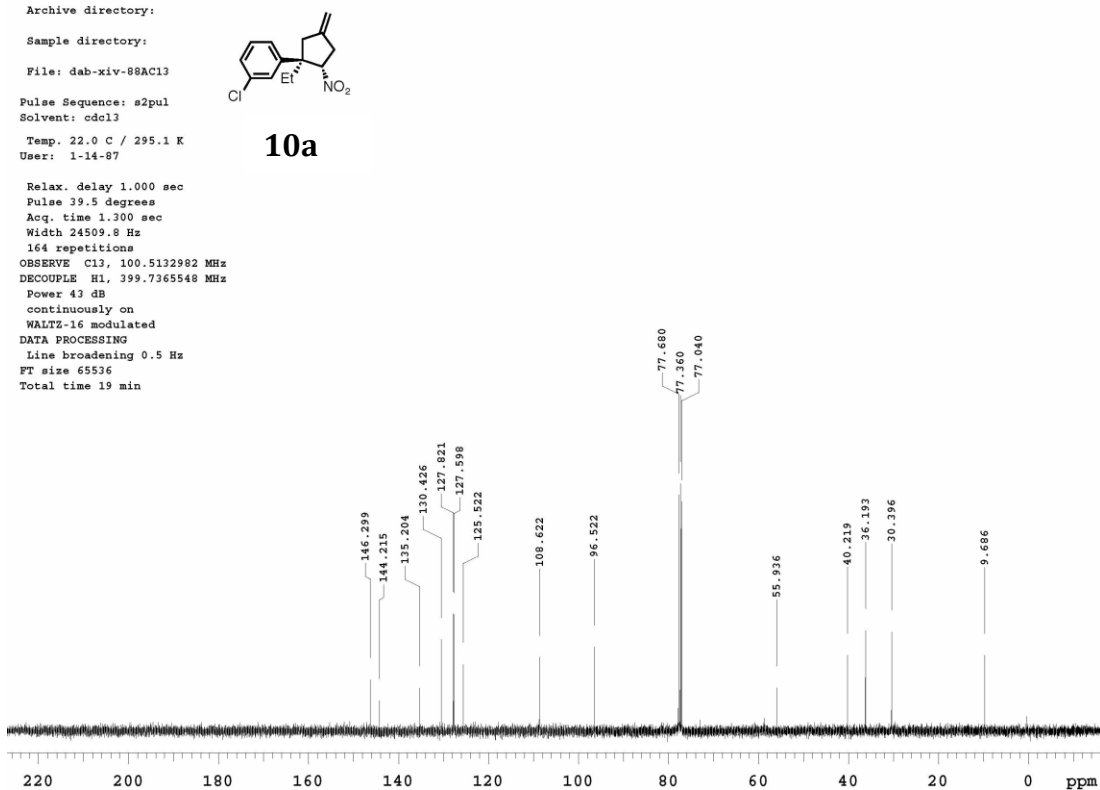

Std proton

Archive directory:

Sample directory:

File: dab-xv-46Proton

Pulse Sequence: s2pul

Solvent: cdcl3

Temp. 20.0 C / 293.1 K

Relax. delay 0.500 sec

Pulse 45.0 degrees

Acq. time 4.000 sec

Width 5605.4 Hz

16 repetitions

OBSERVE H1, 399.7345518 MHz

DATA PROCESSING

FT size 65536

Total time 1 min

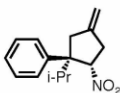

**11a**

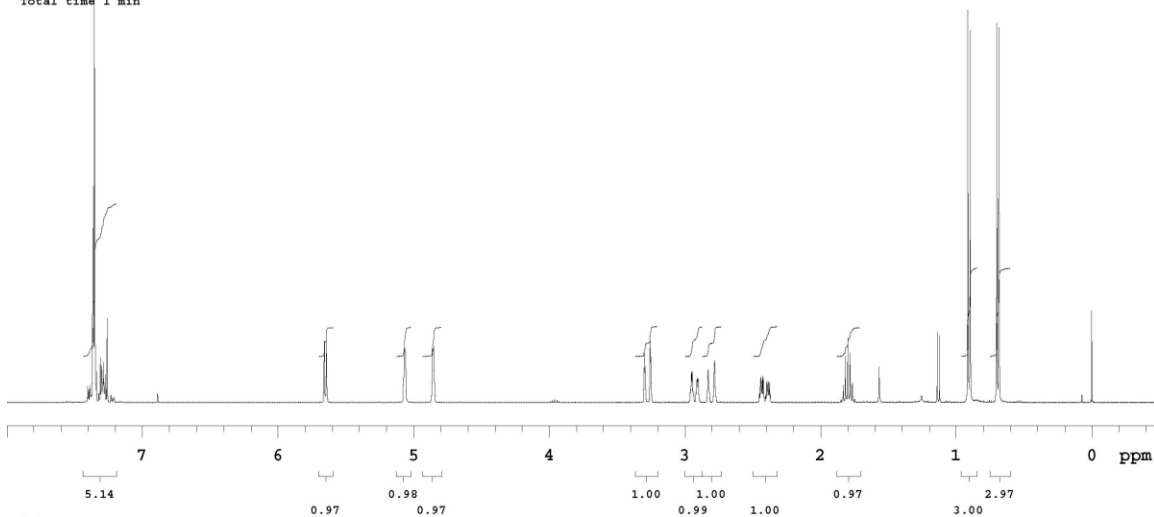

Archive directory:

Sample directory:

File: dab-xv-46C13-2

Pulse Sequence: s2pul

Solvent: cdcl3

Temp. 20.0 C / 293.1 K

User: 1-14-87

Relax. delay 1.000 sec

Pulse 39.5 degrees

Acq. time 1.300 sec

Width 24509.8 Hz

40 repetitions

OBSERVE C13, 100.5132997 MHz

DECOUPLE H1, 399.7365548 MHz

Power 43 dB

Continuously on

WALTZ-16 modulated

DATA PROCESSING

Line broadening 0.5 Hz

FT size 65536

Total time 19 min

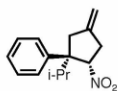

**11a**

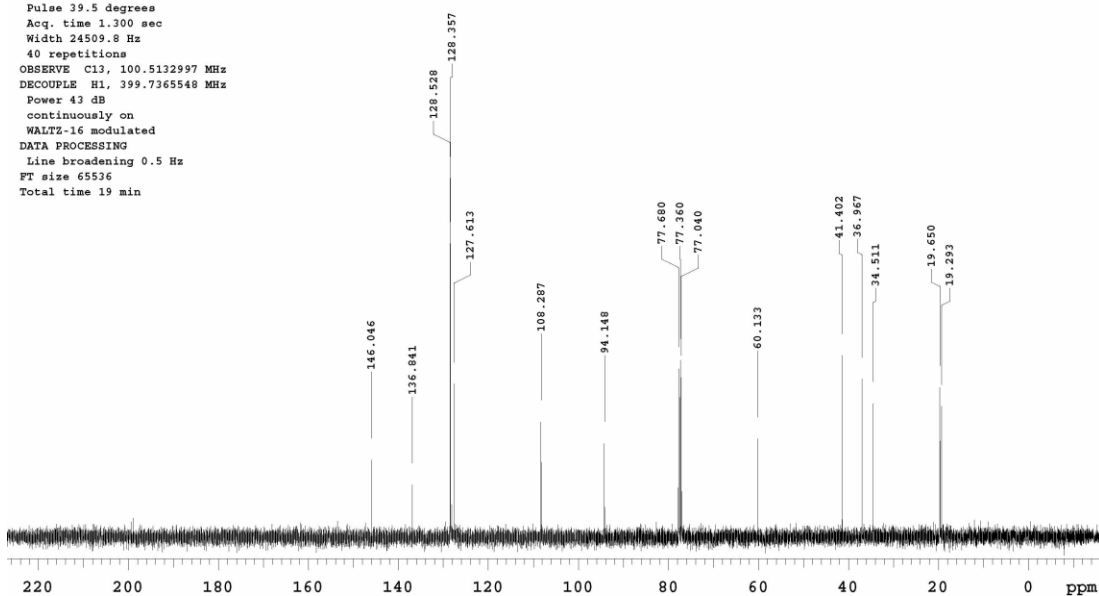

STANDARD 1H OBSERVE

Archive directory:  
/export/home/dbringle/vnmrsys/data  
Sample directory:

File: dab-xv-41

Pulse Sequence: s2pul  
Solvent: CDCl3  
Temp. 23.0 C / 296.1 K

Relax. delay 0.500 sec  
Pulse 52.1 degrees  
Acq. time 4.002 sec  
Width 4997.5 Hz  
16 repetitions  
OBSERVE H1, 400.1115371 MHz  
DATA PROCESSING  
FT size 65536  
Total time 1 min

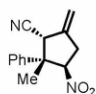

12

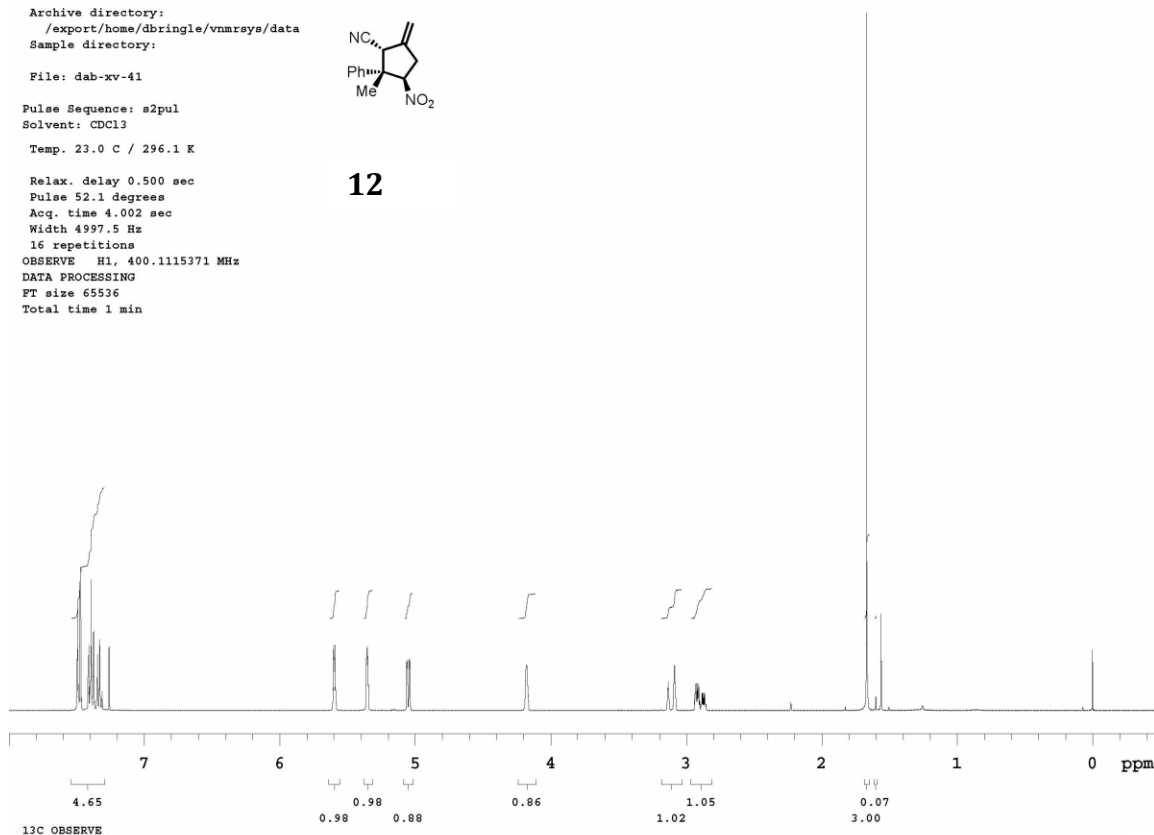

Archive directory:  
/export/home/dbringle/vnmrsys/data  
Sample directory:

File: dab-xv-41AC13

Pulse Sequence: s2pul  
Solvent: CDCl3

Relax. delay 0.500 sec  
Pulse 38.1 degrees  
Acq. time 1.199 sec  
Width 25000.0 Hz  
176 repetitions  
OBSERVE C13, 100.6080930 MHz  
DECOUPLE H1, 400.1115371 MHz  
Power 43 dB  
continuously on  
WALTZ-16 modulated  
DATA PROCESSING  
Line broadening 0.5 Hz  
FT size 65536  
Total time 29 min

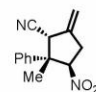

12

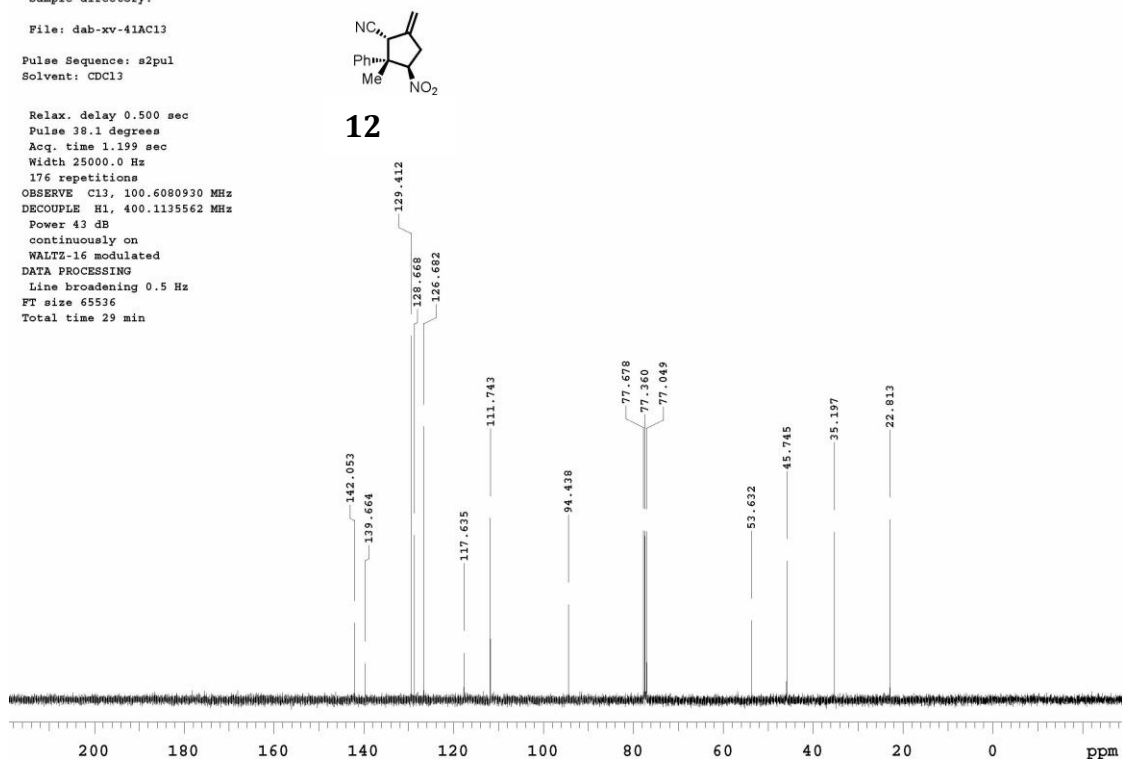

## STANDARD 1H OBSERVE

Archive directory:  
/export/home/dbringle/vnmrsvs/data  
Sample directory:

File: dab-xv-32

Pulse Sequence: s2pul  
Solvent: CDCl<sub>3</sub>  
Temp. 23.0 C / 296.1 K

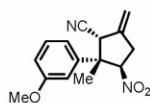

13

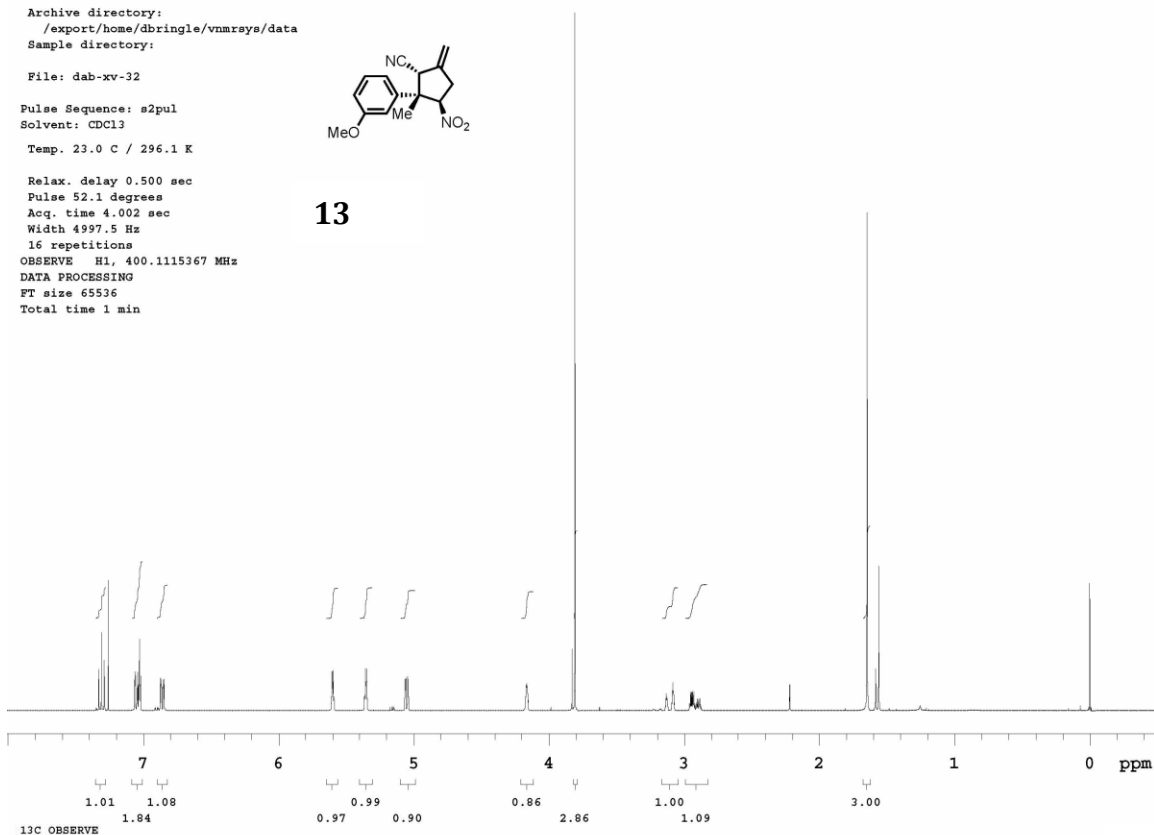

Archive directory:  
/export/home/dbringle/vnmrsvs/data  
Sample directory:

File: dab-xv-32BC13

Pulse Sequence: s2pul  
Solvent: CDCl<sub>3</sub>

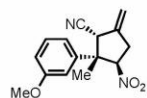

13

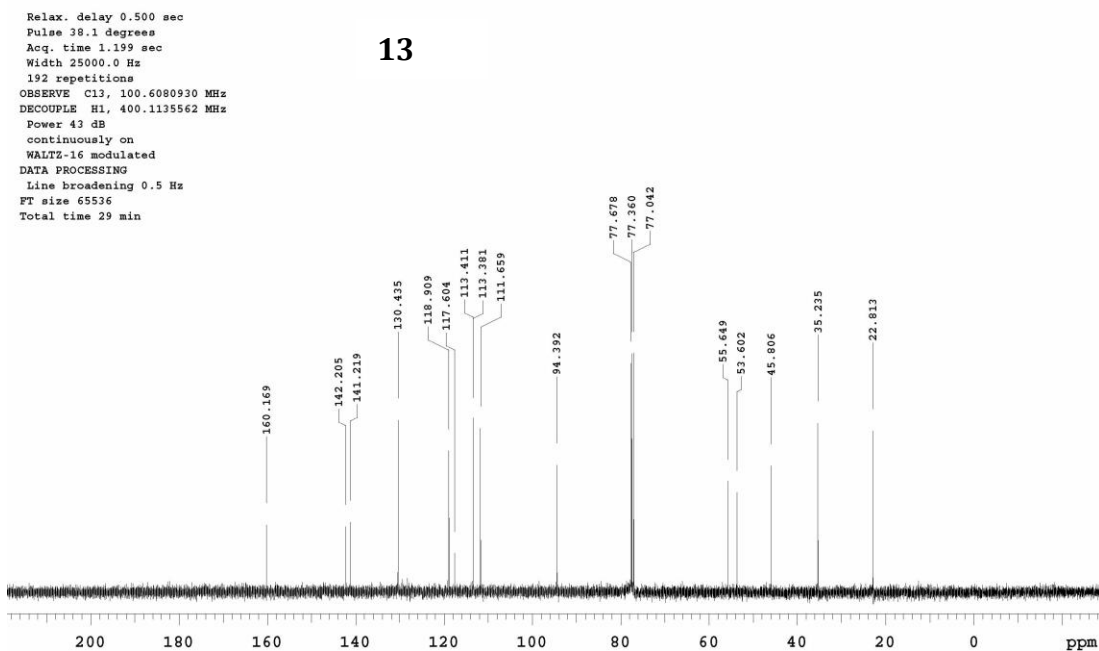

```

expl s2pu1
SAMPLE
date Aug 24 2012 dfrq 499.751
solvent CDC13 do H1
file exp dpwr 30
ACQUISITION
sfrq 499.751 dm nnn
tn H1 dm c
at 4.000 daf 200
np 64000 dseq 1.0
sw 8000.0 dres n
fb 4000 homo
bs 1 DEC2 0
tpwr 60 dfrq2 0
pw 5.0 dn2 1
dl 0 dpwr2 0
tof 0 dof2 0
nt 16 dm2 n
rt 16 dmm2 c
alock n dm2 200
gain 40 dres2 1.0
FLAGS n homo2 n
in n PROCESSING
dp y wfile ft
hs nm proc 65536
DISPLAY
sp -1513.7 math f
vp 7989.8
vs 151 werr
sc 0 wexp
wc 250 vbs
hzm 4.13 wnt wft
ls 2707.26
rf1 5142.1
rfp 3628.2
th 7
ins 1.000
nm cdc ph

```

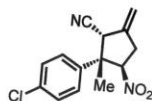

14

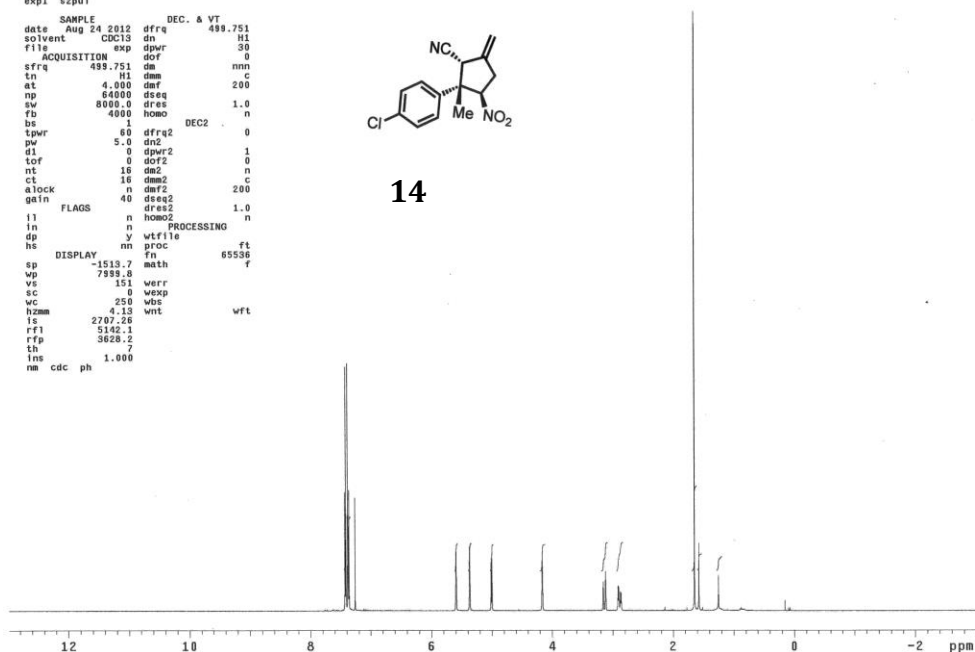

```

expl s2pu1
SAMPLE
date Aug 24 2012 do DEC. & VT H1
solvent CDC13 dof -499.0
file exp dm yyy
ACQUISITION
sfrq 125.674 dm 9950
tn C13 dpwr 45
at 1.500 PROCESSING
np 39016 lb 2.00
sw 39003.3 fn not used
fb 16000 math f
bs 16
pw 5.0 werr
tpwr 5.0 wexp
dl 0.500 wnt
tof 100.0 DISPLAY
nt 256 sp -4488.0
ct 64 wp 39002.5
alock n vs 16152
gain 54 sc 0
FLAGS n wc 250
in n hzm 5.80
dp y ls 595.00
hs nm rf1 14175.1
th rfp 9676.0
ins 23
al ph 1.000

```

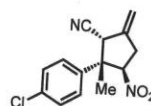

14

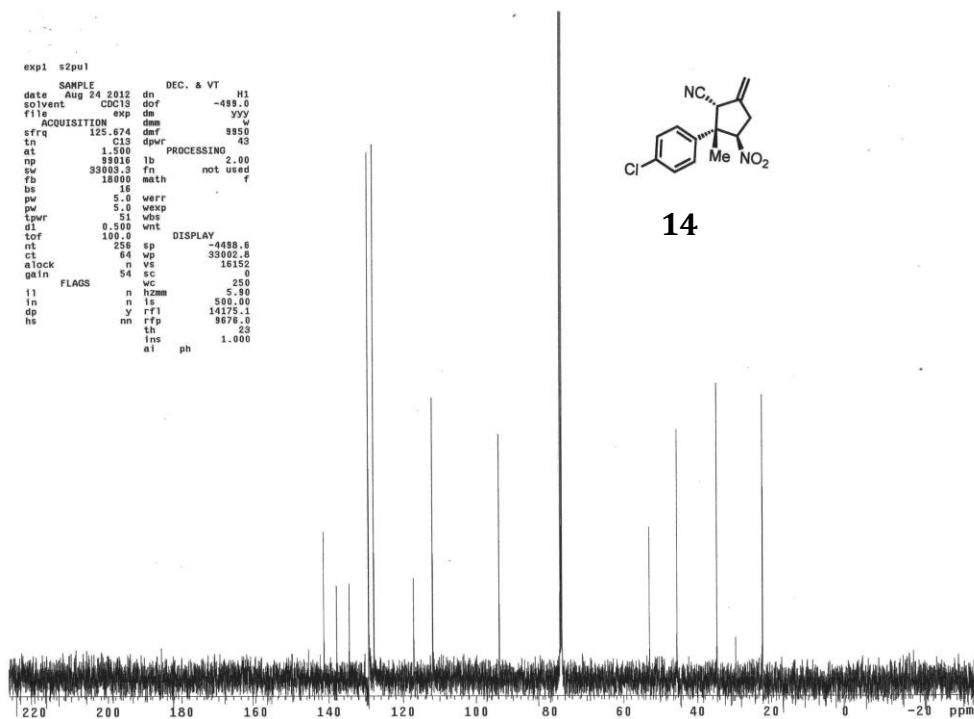

```

expl s2pul
SAMPLE
date Sep 12 2012 DEC. & VT
solvent CDC13 dn 499.751
file exp dpwr H1
ACQUISITION dnf 30
sfrq 499.751 dm nmn
tn H1 dm C
at 4.000 dmf 200
np 64000 dseq 1.0
sw 8000.0 dres n
fb 4000 homo
bs 1
tpwr 60 dfrq2 DEC2 0
pw 5.0 dn2 1
dt 0 dpr2 0
tof 0 dof2 0
nt 16 dm2 n
ct 16 dm2 c
atock n dm2 200
gain 40 dseq2 1.0
FLAGS n homo2 n
il n
in n PROCESSING
dp y utfile ft
hs nm proc 65536
DISPLAY fn
sp -1513.8 math
wp 7989.8 f
vs 151 verr
sc 0 wexp
wc 250 vbs wft
hzm 3.52 vnt
ls 2568.74
rf 5142.3
rfp 3628.2
th 7
ins 1.000
nm cdc ph

```

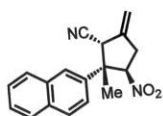

15

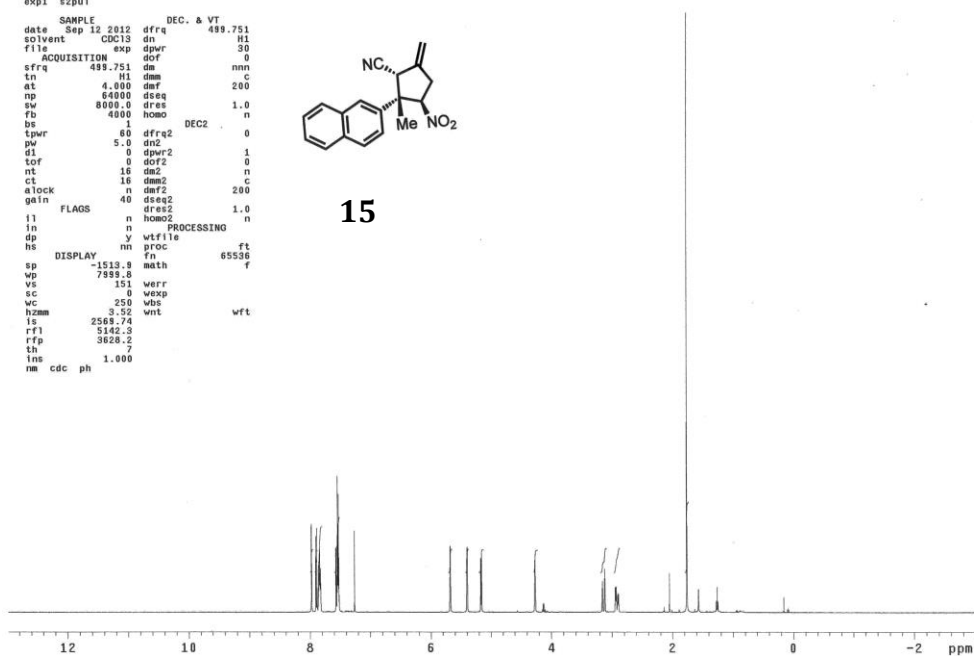

```

expl s2pul
SAMPLE
date Sep 12 2012 DEC. & VT
solvent CDC13 dn -499.0
file exp dm yyy
ACQUISITION dm w
sfrq 125.674 dmf 9950
tn CDC13 dpwr 48
at 1.500 PROCESSING
np 99915 lb 2.00
sw 39083.3 fn not used
fb 18000 math f
bs 16
pw 5.0 verr
dt 0.500 vnt
tpwr 100.0 DISPLAY
nt 1000 sp -4488.6
ct 396 wp 39082.6
atock n vs 53916
gain 54 sc 0
FLAGS n hzm 4.48
il n ls 500.00
in y rffl 14175.1
dp nm rfp 9676.0
hs ins 23
at ph 1.000

```

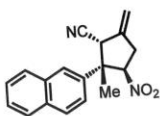

15

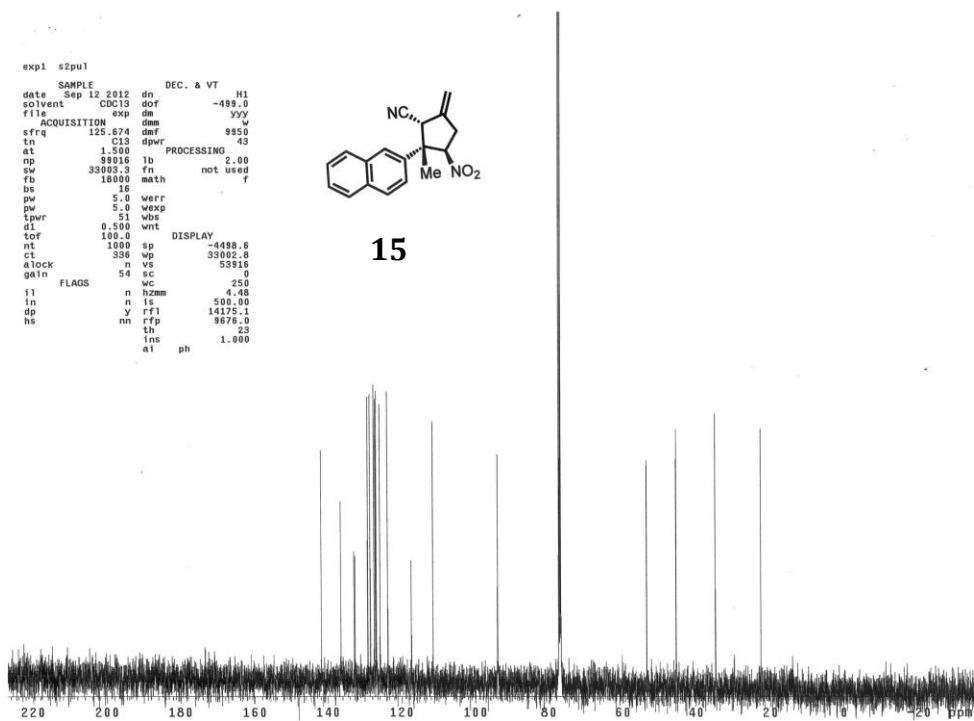

```

expt s2pu1
SAMPLE
date Oct 18 2012 DEC. & VT
solvent CDCl3 dn 499.751
file exp dpwr 30
ACQUISITION dof 0
sfrq 499.751 dm nnn
at 4.000 daf 200
np 64000 dseq
sw 8000.0 dres 1.0
fb 4000 homo n
bs 1
tpwr 60 dfrq2 0
pw 5.0 dn2 1
dl 0 dpwr2 0
tof 0 dof2 0
nt 16 dm2 n
ct 16 dnm2 200
alock n dseq2
gain 40 dres2 1.0
FLAGS n homo2
il n PROCESSING
in n vtrfile ft
hs nn proc 85536
DISPLAY fn
sp -1513.7 math
wp 7993.8 f
vs 420 verr
sc 0 wexp
wc 250 vbs
hwm 6.22 wnt wft
ls 1959.92
rfl 5142.1
rfp 3628.2
th
ins 1.000
nm cdc ph

```

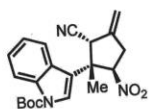

16

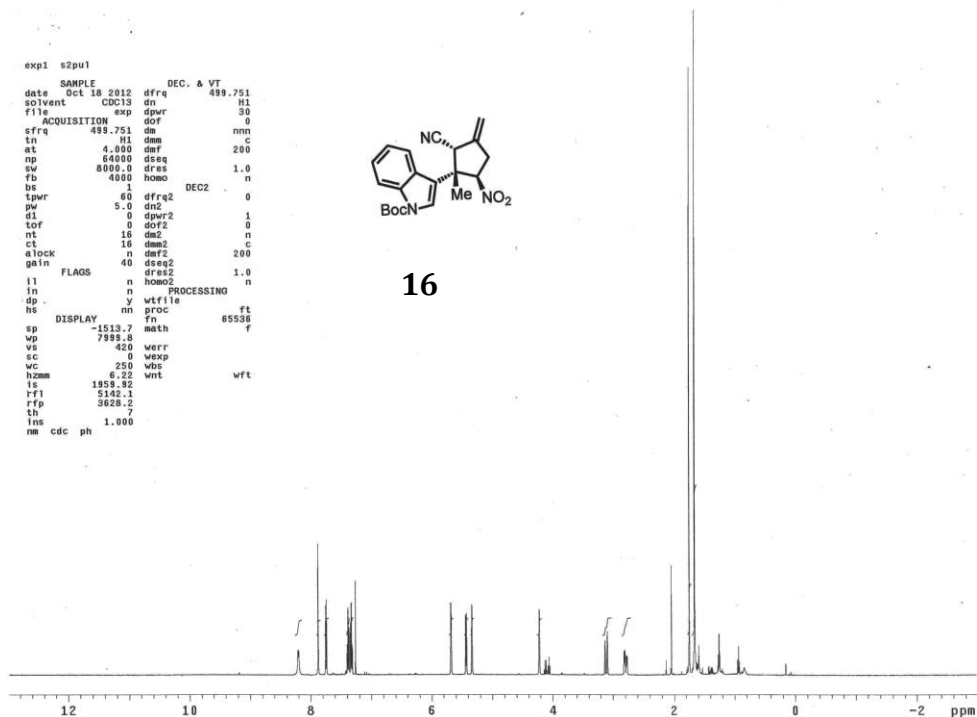

```

expt s2pu1
SAMPLE
date Oct 18 2012 DEC. & VT
solvent CDCl3 dn -499.0
file exp dm 330
ACQUISITION dm 330
sfrq 125.674 daf 9950
at 1.500 C13 45
np 33016 lb PROCESSING
sw 33003.3 fn not used
fb 16000 math f
bs 16
pw 5.0 verr
tpwr 5.0 wexp
dl 0.500 vbs
nt 100.0 wnt
tof 1000 sp DISPLAY
ct 128 wp -4498.6
alock n vs 33002.0
gain 54 sc 18189
FLAGS n wc
il n hwm 6.89
in n ls 500.00
dp y rfl 14175.1
hs nm rfp 9676.0
th
ins 1.000
at ph

```

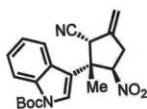

16

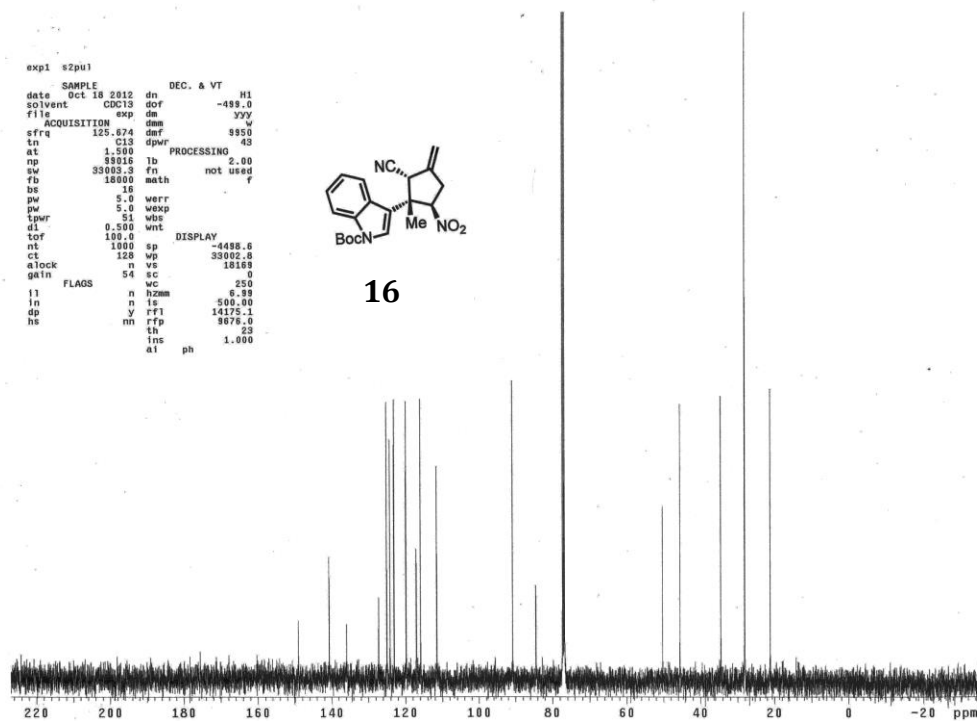

```

expt s2pu1
SAMPLE
date Aug 22 2012 DEC. & VT
solvent CDC13 dn 499.751
file exp dpwr H1
ACQUISITION dof 0
sfrq 499.751 dm nm
at 4.000 dmf 200
np 64000 dseq 1.0
sw 8000.0 drss n
fb 4000 homo
bs 1
tpwr 60 dfrq2 0
pw 5.0 dn2 1
dl 0 dpwr2 0
tof 0 dof2 0
nt 16 dm2 n
ct 16 dnm2 c
alock 40 dmf2 200
gain n dseq2 1.0
FLAGS n dm22 n
il n PROCESSING
in n vtrfile ft
dp y n
hs nn proc 65536
DISPLAY fn f
sp -1513.9 math
wp 7993.8
vs 151 verr
sc 20 wexp
wc 20 vbs wft
h2mm 2.80 vnt
ls 3079.32
rfl 5142.3
rpf 3628.2
th 7
ins 1.000
nm cdc ph

```

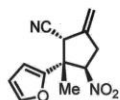

17

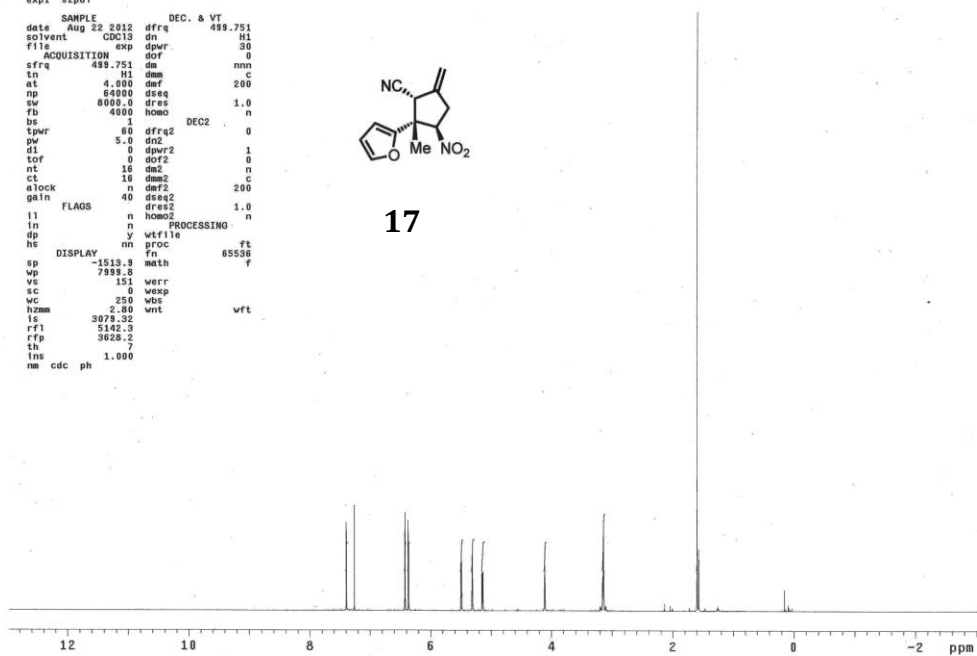

```

expt s2pu1
SAMPLE
date Aug 22 2012 DEC. & VT H1
solvent CDC13 dof -499.0
file exp dm yyy
ACQUISITION dm w
sfrq 125.674 dmf 9950
np 1.500 CLS 43
sw 39916.3 dpwr 2.00
fb 18000 fn not used
bs 16 math f
pw 5.0 verr
dl 0.500 vnt
nt 100.0 DISPLAY
ct 256 sp -4438.1
alock 176 wp 33982.0
gain 54 n vs 17521
FLAGS n wc 0
il n h2mm 132.01
in n ls 500.00
dp y rfl 14174.6
hs nn rpf 9676.0
ins th 23
at ph 1.000

```

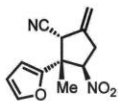

17

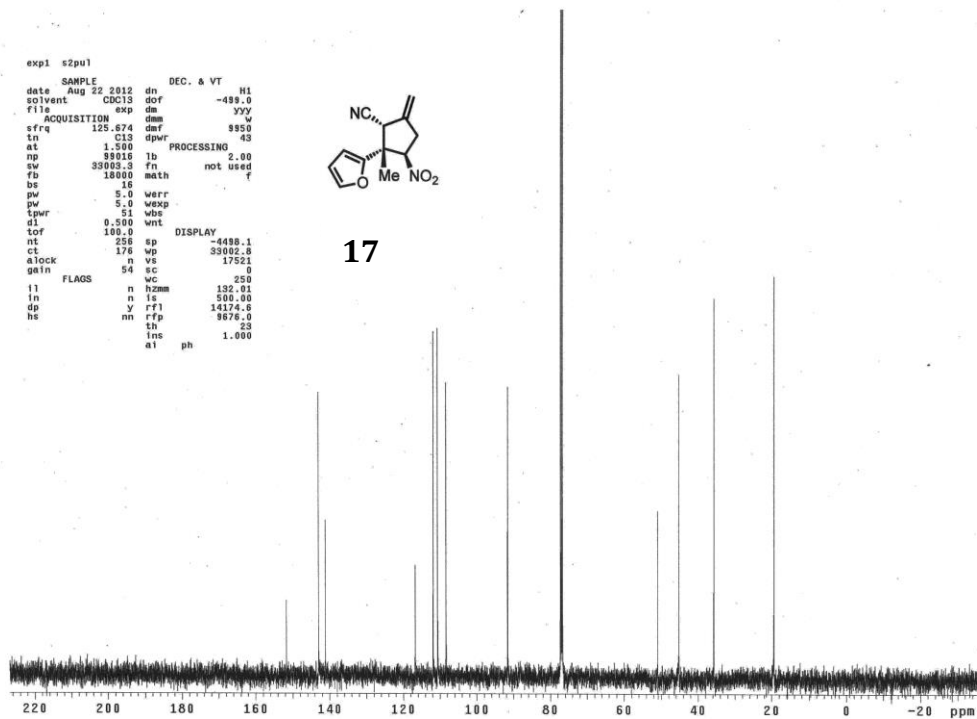

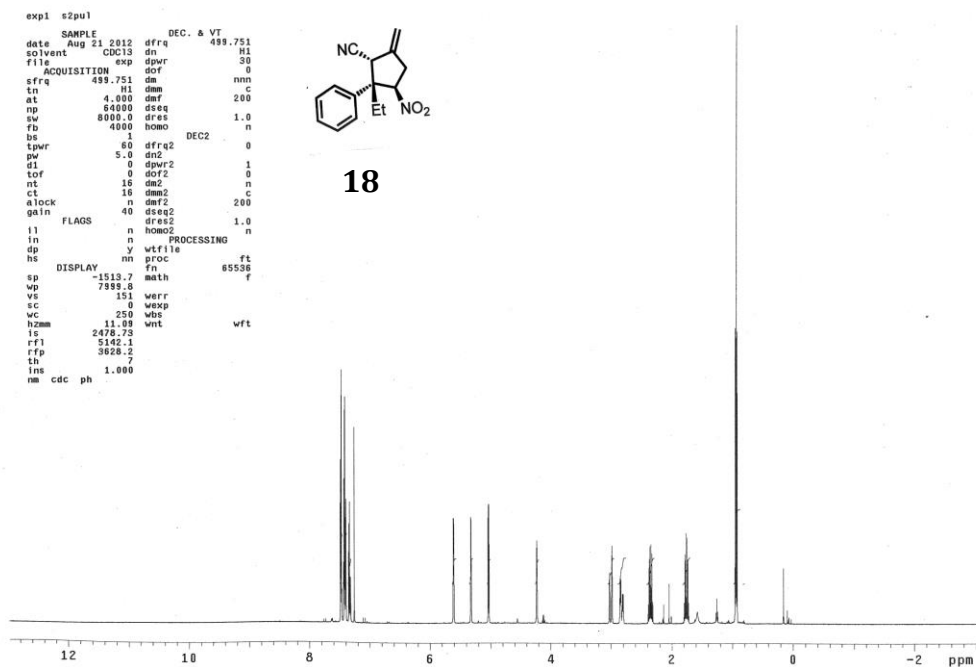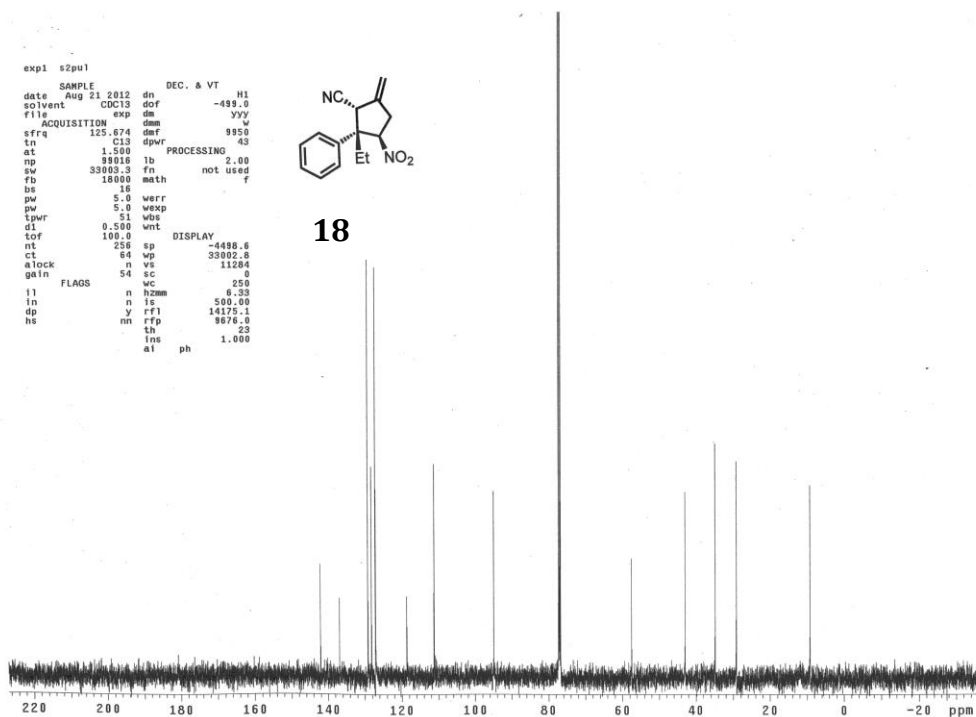

```

exp1 s2pu1
SAMPLE
date Sep 4 2012 dfrq 499.751
solvent CDCl3 dn H1
file ACQUISITION exp dpwr 30
sfrq 499.751 de nm
tn H1 dnm c
ot 4.000 dnr 200
np 64000 dseq 1.0
sw 8000.0 dres n
fb 6000 homo
bs 1 DEC2 0
tprw 60 dfrq2 0
pw 5.0 dn2 1
dl 0 dpr2 0
tof 0 dnf2 0
nt 16 dm2 n
ct 16 dnm2 c
alock n dnf2 200
gain 40 dseq2 1.0
flags n dres2 n
tl n homo2 n
in n PROCESSING
dp n wtfille ft
hs n proc f
DISPLAY
sp -1513.9 math f
wp 7999.8
vs 151 verr
sc 0 wexp
wc 250 wbs wft
hzmm 9.76 wnt
ls 2282.41
rfi 5142.3
rfp 3628.2
th 7
ins 1.000
nm cdc ph

```

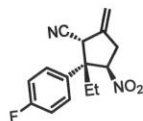

19

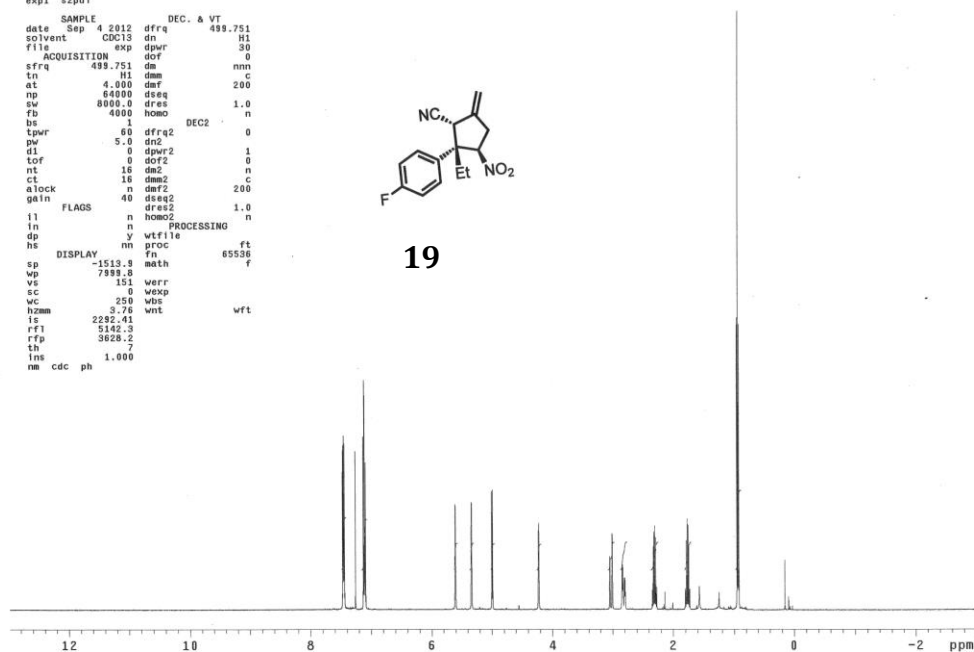

```

exp1 s2pu1
SAMPLE
date Sep 4 2012 dn -499.0 H1
solvent CDCl3 dnr yyy
file ACQUISITION exp dm 30
sfrq 125.674 dnm 9950
tn C13 dprw 43
ot 1.500 dn not used
np 99016 lb math f
sw 33083.3 fn
fb 16000
bs 16
tprw 5.0 verr
pw 5.0 wexp
dl 0.500 wnt
tof 100.0 DISPLAY
nt 256 sp -4498.1
ct 256 wp 33002.8
alock n vs 43087
gain 54 sc 0
flags n wc 132.01
tl n hzmm 500.00
in n ls 14574.6
dp y rfi 9676.0
hs nm rfp 23
ins 1.000
al ph

```

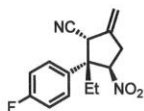

19

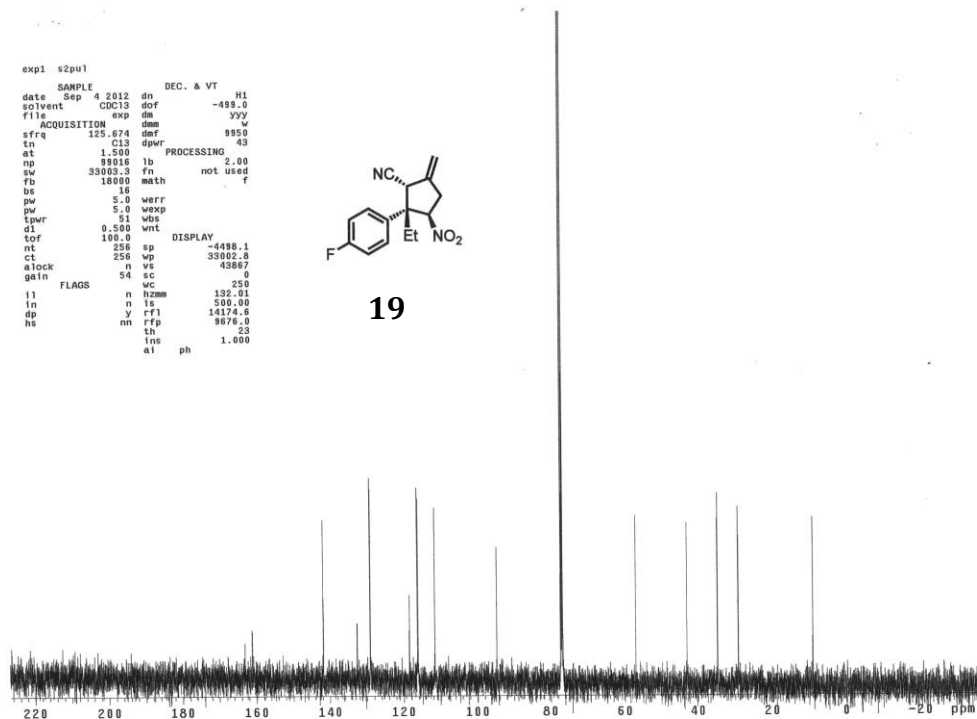

```

exp1 s2pu1
SAMPLE
date Sep 10 2012 dfrq DEC. & VT 499.751
solvent CDCl3 dn H1
file exp dpwr 30
ACQUISITION
sfrq 499.751 dm nnn
tn H1 dnm c
at 4.000 dmf 200
np 64000 dseq 1.0
sw 8000.8 dres n
fb 4000 homo n
bs 1 DECZ 0
tpwr 60 dfrq2 0
pw 5.0 dn2 1
dl 0 dpwr2 0
toF 0 doF2 0
nt 16 dm2 n
ct 16 dm2 c
alock n dmF2 200
gain 40 dseq2 1.0
FLAGS n dm2 n
ll n homo2 n
ln n PROCESSING
dp v wtrfile ft
hs m proc fn 65536
DISPLAY
sp -1514.2 math f
wp 7989.8
vs 151 verr
sc 0 wexp
wc 250 vbs wft
h2mm 5.28 wnt
fs 1946.33
rf1 5142.6
rfp 3628.2
th 7
ins
nm cdc ph 1.000

```

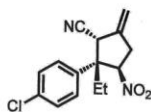

20

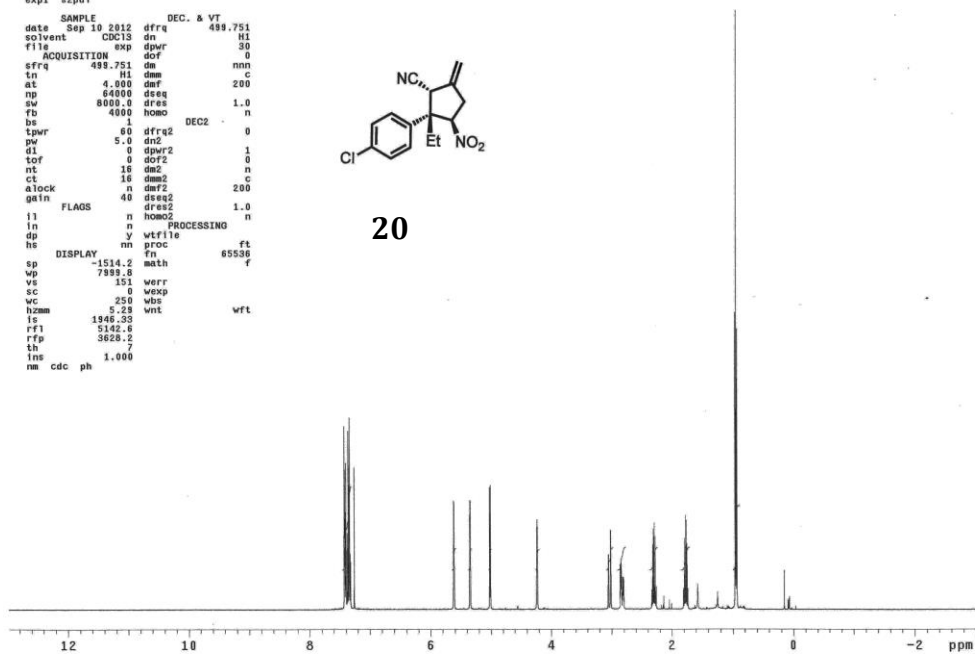

```

exp1 s2pu1
SAMPLE
date Sep 10 2012 dn DEC. & VT H1
solvent CDCl3 dof -499.0
file exp dm yyy
ACQUISITION
sfrq 125.674 dmf 9950
tn C13 dpwr 43
at 1.500 C13 PROCESSING 2.00
np 9909.6 lb not used
sw 33003.3 fn math f
fb 16000
bs 16
pw 5.0 verr
tpwr 5.0 wexp
dl 0.500 wnt
toF 100.0 DISPLAY
nt 256 sp -4488.6
ct 64 wp 33002.6
alock n vs 14898
gain 54 wc 0
FLAGS n h2mm 250
ll n ls 5.79
ln n is 500.00
dp v rf1 14175.1
hs nm rfp 8676.0
ins
at ph 1.000

```

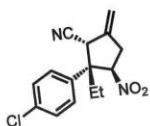

20

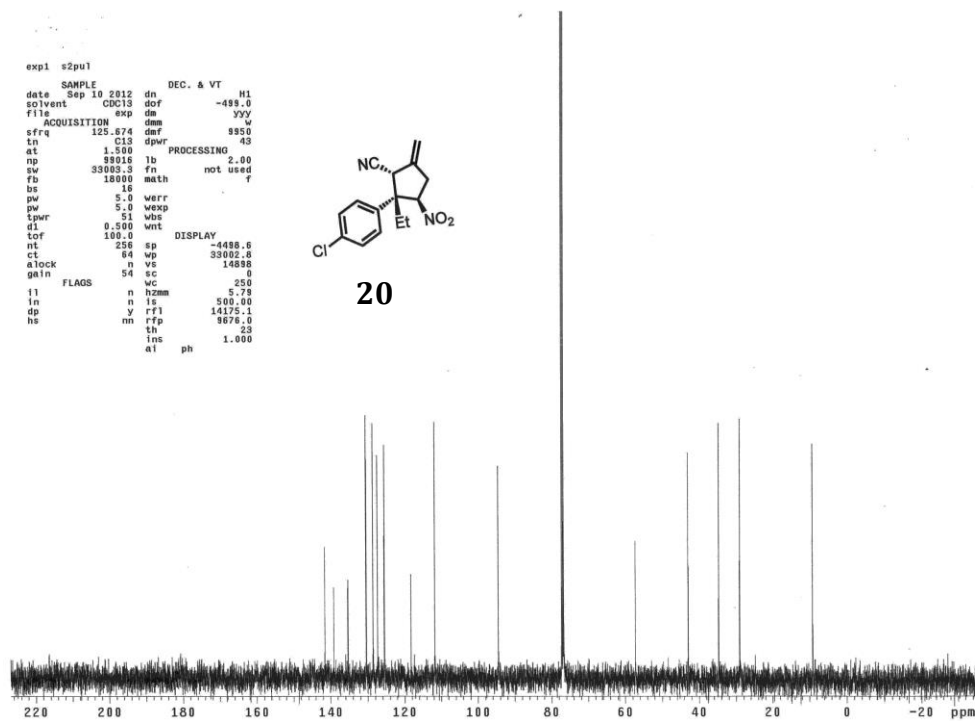

STANDARD 1H OBSERVE

Archive directory:  
/export/home/dbringle/vnmrnsys/data  
Sample directory:

File: dab-xv-31

Pulse Sequence: s2pul  
Solvent: CDCl3  
Temp. 23.0 C / 296.1 K

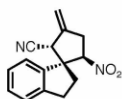

21

Relax. delay 0.500 sec  
Pulse 52.1 degrees  
Acq. time 4.002 sec  
Width 4997.5 Hz  
16 repetitions  
OBSERVE H1, 400.1115373 MHz  
DATA PROCESSING  
FT size 65536  
Total time 1 min

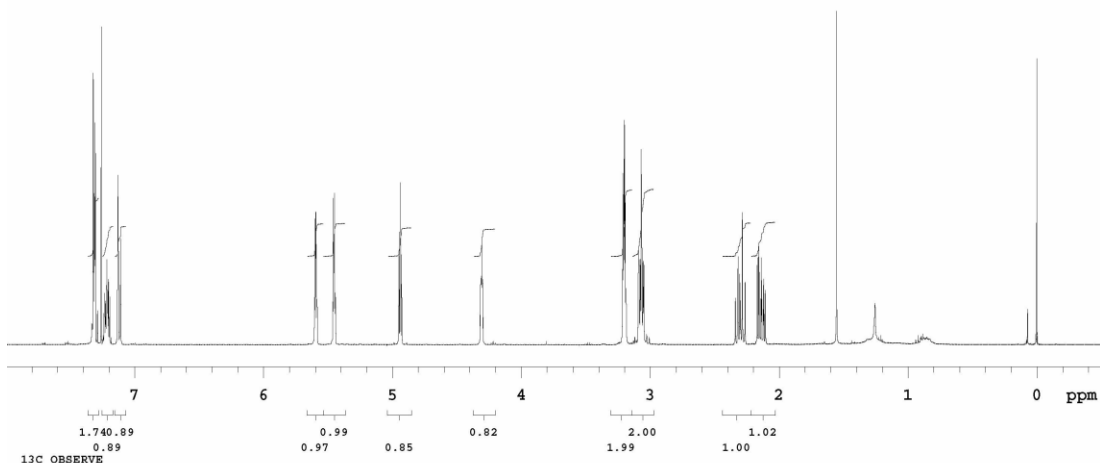

Archive directory:  
/export/home/dbringle/vnmrnsys/data  
Sample directory:

File: dab-xv-31BC13

Pulse Sequence: s2pul  
Solvent: CDCl3

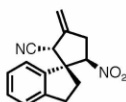

21

Relax. delay 0.500 sec  
Pulse 38.1 degrees  
Acq. time 1.199 sec  
Width 25000.0 Hz  
160 repetitions  
OBSERVE C13, 100.6080930 MHz  
DECOUPLE H1, 400.1135562 MHz  
Power 43 dB  
continuously on  
WALTZ-16 modulated  
DATA PROCESSING  
Line broadening 0.5 Hz  
FT size 65536  
Total time 29 min

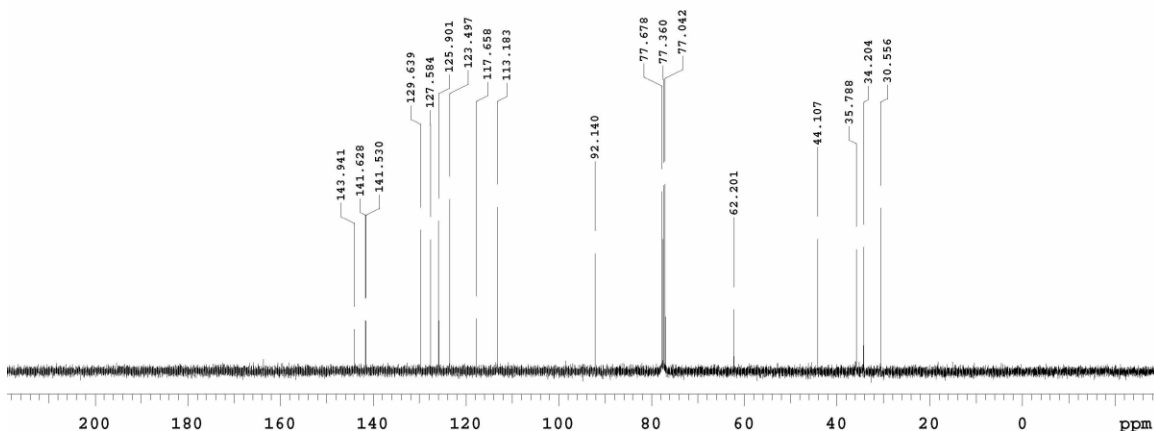

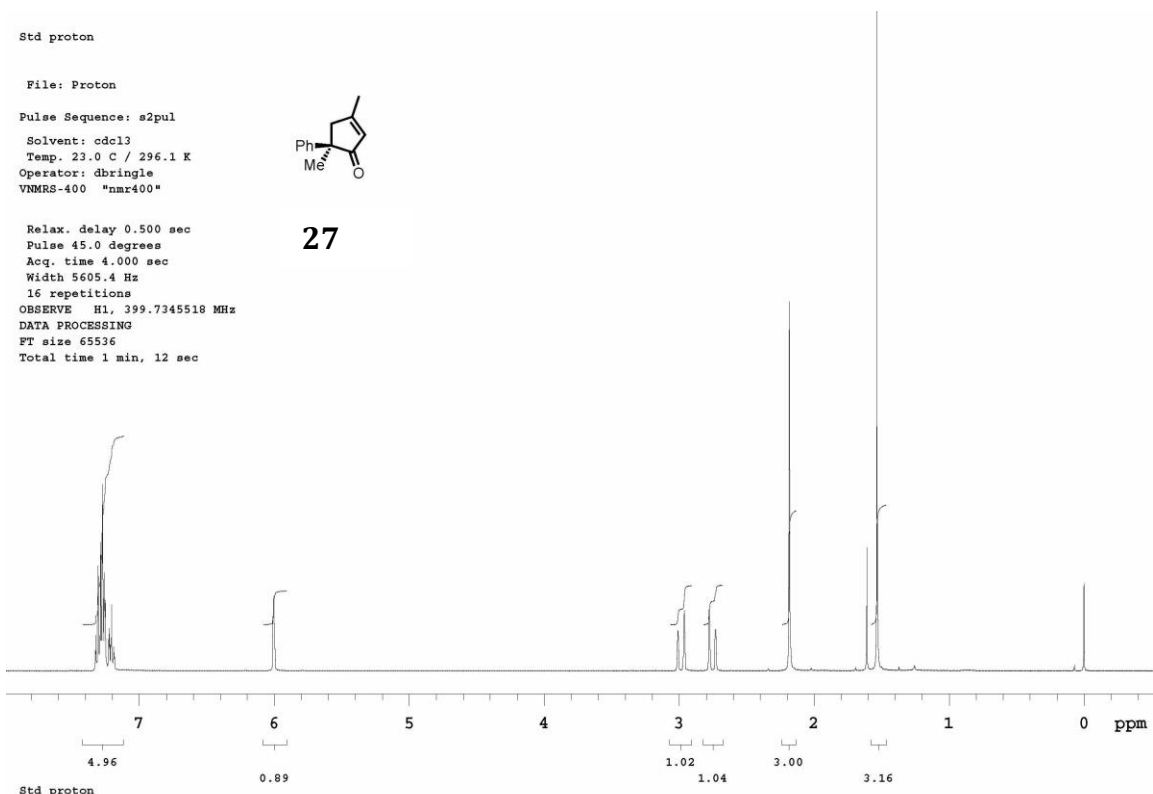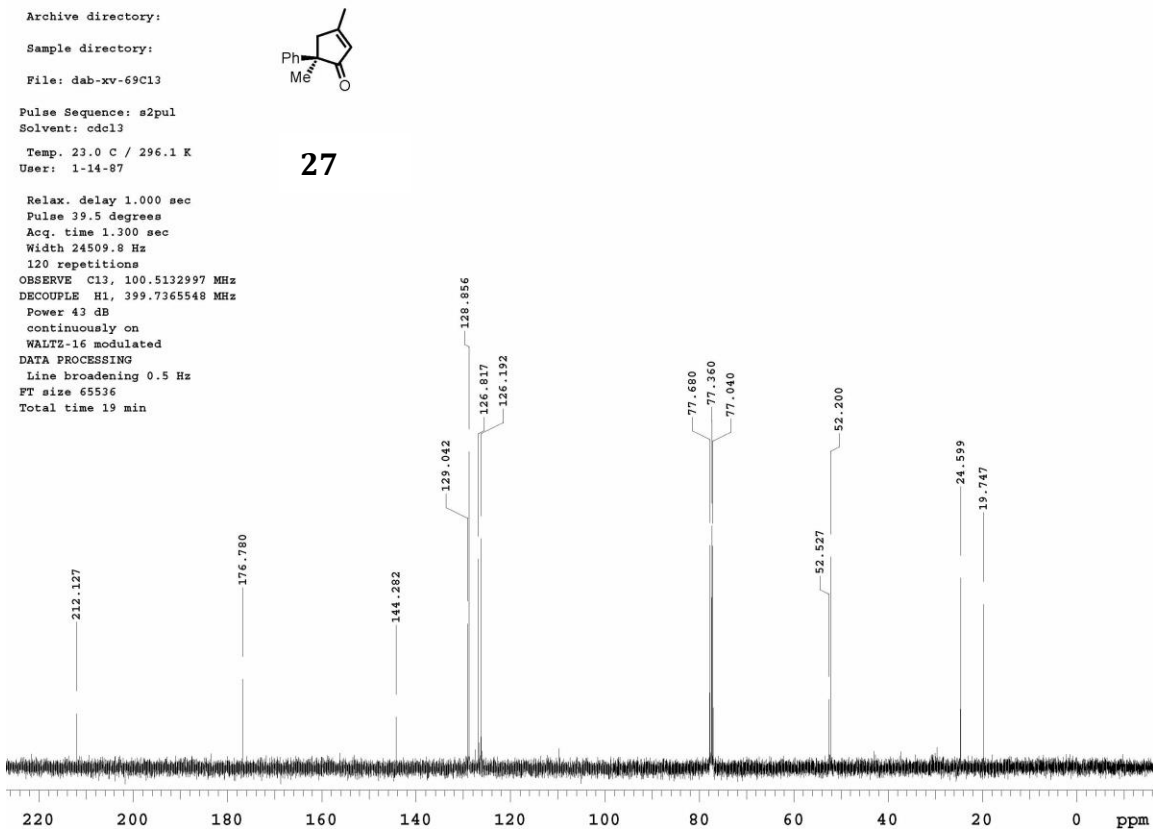

Std proton

Archive directory:

Sample directory:

File: dab-xvi-52

Pulse Sequence: s2pul

Solvent: cdcl3

Temp. 23.0 C / 296.1 K

Relax. delay 0.500 sec

Pulse 45.0 degrees

Acq. time 4.000 sec

Width 5605.4 Hz

16 repetitions

OBSERVE H1, 399.7345513 MHz

DATA PROCESSING

FT size 65536

Total time 1 min

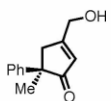

29

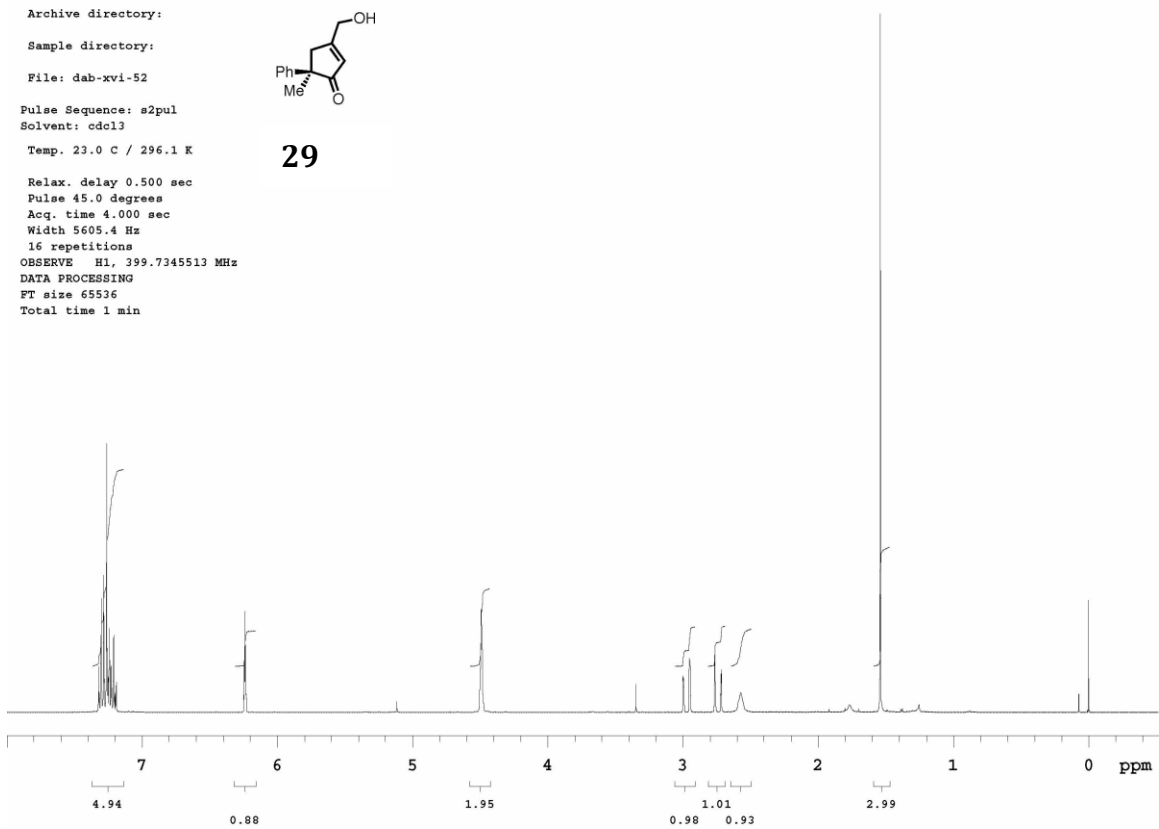

Std proton

Archive directory:

Sample directory:

File: dab-xvi-52C13

Pulse Sequence: s2pul

Solvent: cdcl3

Temp. 23.0 C / 296.1 K

User: 1-14-87

Relax. delay 1.000 sec

Pulse 39.5 degrees

Acq. time 1.300 sec

Width 24509.8 Hz

96 repetitions

OBSERVE C13, 100.5133005 MHz

DECOUPLE H1, 399.7365548 MHz

Power 43 dB

continuously on

WALTZ-16 modulated

DATA PROCESSING

Line broadening 0.5 Hz

FT size 65536

Total time 19 min

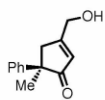

29

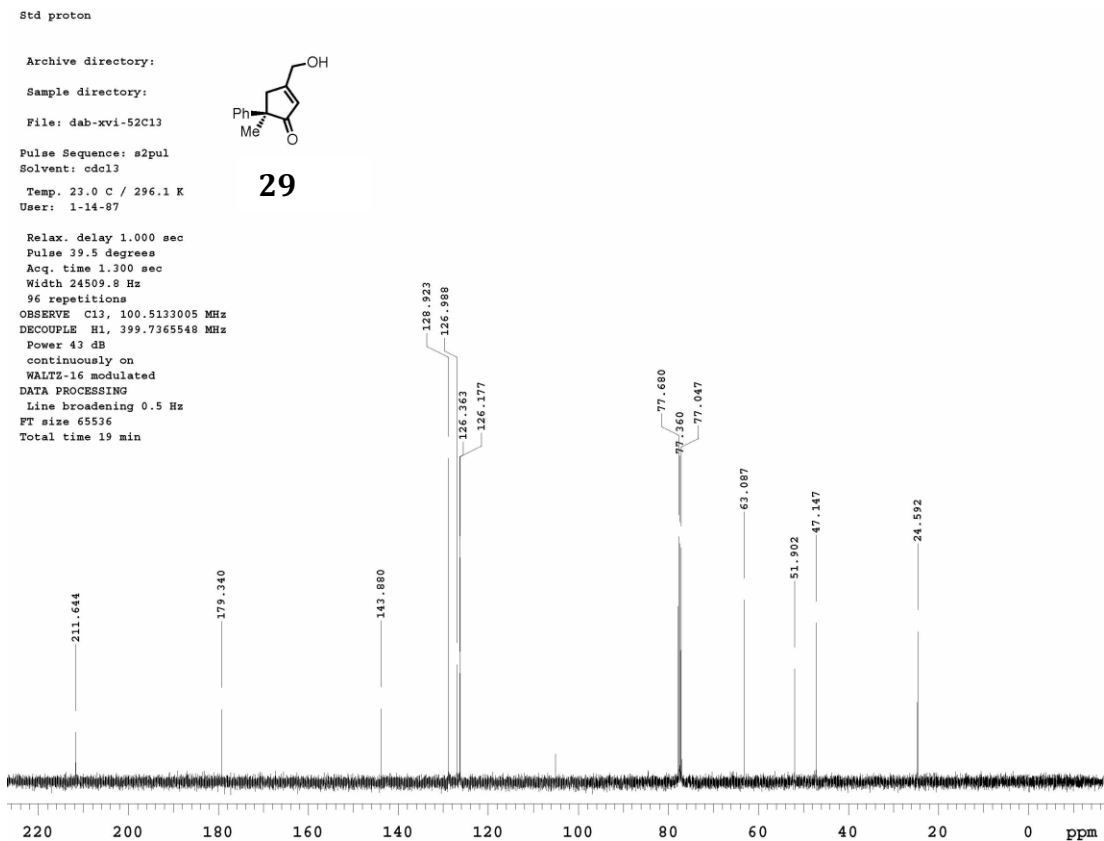

## G. References

---

- i. Perrin, D. D.; Armarego, W. L. F. *Purification of Laboratory Chemicals*, 5th Ed.; Pergamon Press: Oxford, 1988.
- ii. Komiya, S. *Synthesis of Organometallic Compounds. A Practical Guide*; John Wiley & Sons: New York, 1997.
- iii. Trost, B. M.; Chan, D. M. T. *J. Am. Chem. Soc.* **1979**, *101*, 6429.
- iv. Trost, B. M.; Nanninga, T. N.; Satoh, T. *J. Am. Chem. Soc.* **1985**, *107*, 721.
- v. Rimkus, A.; Sewald, N. *Org. Lett.* **2003**, *5*, 79.
- vi. Trost, B. M.; Silverman, S. M.; Stambuli, J. P. *J. Am. Chem. Soc.* **2007**, *129*, 12398.
- vii. B. M. Trost, R. C. Bunt, S. R. Pulley, *J. Org. Chem.* **1994**, *59*, 4202.
- viii. Fryszkowska, A.; Fisher, K.; Gardiner, J. M.; Stephens, G. M. *J. Org. Chem.* **2008**, *73*, 4295.
- ix. Martin, N. J. A.; Ozores, L.; List, B. *J. Am. Chem. Soc.* **2007**, *129*, 8976.
- x. Wu, J.; Mampreian, D. M.; Hoveyda, A. H. *J. Am. Chem. Soc.* **2005**, *127*, 4584.
